# Supplementary material
Source: PubMed Central journal article supplement (PMC9007557)

# Cu-Catalyzed Cross-Coupling of Nitroarenes with Aryl Boronic Acids to Construct Diarylamines

Xinyu Guan,<sup>1</sup> Haoran Zhu,<sup>1</sup> and Tom G. Driver<sup>1</sup>

<sup>1</sup> Department of Chemistry, University of Illinois at Chicago, 845 West Taylor Street, Chicago, IL, USA, 60607-7061  
[tgd@uic.edu](mailto:tgd@uic.edu)

## Supporting Information

### Contents:

|      |                                             |      |
|------|---------------------------------------------|------|
| I.   | Cu-Catalyzed Formation of Diarylamines..... | s-2  |
| II.  | Mechanistic Experiments.....                | s-13 |
| III. | Spectral Data.....                          | s-17 |

**General.** <sup>1</sup>H NMR and <sup>13</sup>C NMR spectra were recorded at ambient temperature using 500 MHz or 300 MHz spectrometers. The data are reported as follows: chemical shift in ppm from internal tetramethylsilane on the  $\delta$  scale, multiplicity (br = broad, s = singlet, d = doublet, t = triplet, q = quartet, m = multiplet), coupling constants (Hz) and integration. High-resolution mass spectra were obtained by peak matching. Melting points are reported uncorrected. Infrared spectroscopy was obtained using a diamond attenuated total reflectance (ATR) accessory. Analytical thin layer chromatography was performed on 0.25 mm extra hard silica gel plates with UV254 fluorescent indicator. HPLC analysis was conducted on an Agilent 1100 instrument equipped with a binary pump and diode array detector. Liquid chromatography was performed using forced flow (flash chromatography) of the indicated solvent system on 60Å (40 – 60  $\mu$ m) mesh silica gel (SiO<sub>2</sub>). Medium pressure liquid chromatography (MPLC) was performed to force flow the indicated solvent system down columns that had been packed with 60Å (40 – 60  $\mu$ m) mesh silica gel (SiO<sub>2</sub>). All reactions were carried out under an atmosphere of nitrogen in glassware, which had been oven-dried. Unless otherwise noted, all reagents were commercially obtained and, where appropriate, purified prior to use. Acetonitrile, methanol, Toluene, THF, Et<sub>2</sub>O, and CH<sub>2</sub>Cl<sub>2</sub> were dried by filtration through alumina according to the procedure of Grubbs.<sup>1</sup> Metal salts were stored in a nitrogen atmosphere dry box.

---

1. Pangborn, A. B.; Giardello, M. A.; Grubbs, R. H.; Rosen, R. K.; Timmers, F. J. *Organometallics* **1996**, *15*, 1518.

## I. Cu-Catalyzed Formation of Diarylamines

### A. Screening of Reductive Cross-coupling Conditions

In a 10 mL Schlenk tube under nitrogen, methyl 4-nitrobenzoate, 4-methoxyphenylboronic acid, catalyst and ligands were suspended in 1 mL of solvent. To the resulting mixture was added the silane reductant and the Schlenk tube was sealed. The reaction mixture was heated. After 30 h, the reaction mixture was cooled to room temperature and filtered through a pad of silica gel. The filtrate was concentrated *in vacuo*, and the residue was analyzed using <sup>1</sup>H NMR spectroscopy using CH<sub>2</sub>Br<sub>2</sub> as the internal standard.

**Table s1.** Optimization of Cu-catalyzed reductive cross-coupling reaction conditions to form diarylamines.

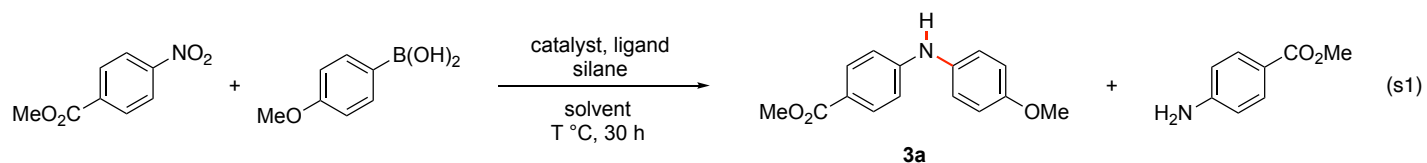

| Entry <sup>a</sup> | ArNO <sub>2</sub><br>(equiv) | ArB(OH) <sub>2</sub><br>(equiv) | catalyst              | mol % | ligand              | mol % | silane             | equiv | additive | mol % | solvent (0.1 M) | T<br>(°C) | %, Yield<br><b>3a</b> <sup>a</sup> | %, Yield<br>aniline <sup>a</sup> |
|--------------------|------------------------------|---------------------------------|-----------------------|-------|---------------------|-------|--------------------|-------|----------|-------|-----------------|-----------|------------------------------------|----------------------------------|
| 1                  | 1.0                          | 1.0                             | Pd(OAc) <sub>2</sub>  | 10    | Cy <sub>2</sub> PhP | 20    | PhSiH <sub>3</sub> | 3.0   | none     | ...   | PhMe            | 100       | 0                                  | 86                               |
| 2                  | 1.0                          | 1.0                             | Ni(acac) <sub>2</sub> | 10    | Cy <sub>2</sub> PhP | 20    | PhSiH <sub>3</sub> | 3.0   | none     | ...   | PhMe            | 100       | n.r.                               | n.r.                             |
| 3                  | 1.0                          | 1.0                             | Fe(OAc) <sub>2</sub>  | 10    | Cy <sub>2</sub> PhP | 20    | PhSiH <sub>3</sub> | 3.0   | none     | ...   | PhMe            | 100       | dec.                               | dec.                             |
| 4                  | 1.0                          | 1.0                             | Cu(OAc) <sub>2</sub>  | 10    | Cy <sub>2</sub> PhP | 20    | PhSiH <sub>3</sub> | 3.0   | none     | ...   | PhMe            | 100       | 21                                 | 40                               |
| 5                  | 1.0                          | 1.0                             | Cu(OAc) <sub>2</sub>  | 10    | DPPB                | 10    | PhSiH <sub>3</sub> | 3.0   | none     | ...   | PhMe            | 100       | 39                                 | 42                               |
| 6                  | 1.0                          | 1.0                             | Cu(OAc) <sub>2</sub>  | 10    | DPPB                | 20    | PhSiH <sub>3</sub> | 3.0   | none     | ...   | PhMe            | 100       | 35                                 | 21                               |
| 7                  | 1.0                          | 1.5                             | Cu(OAc) <sub>2</sub>  | 10    | DPPB                | 20    | PhSiH <sub>3</sub> | 3.0   | none     | ...   | PhMe            | 100       | 65                                 | 32                               |
| 8                  | 1.0                          | 2.0                             | Cu(OAc) <sub>2</sub>  | 10    | DPPB                | 20    | PhSiH <sub>3</sub> | 3.0   | none     | ...   | PhMe            | 100       | 33                                 | 42                               |
| 9                  | 1.5                          | 1.0                             | Cu(OAc) <sub>2</sub>  | 10    | DPPB                | 20    | PhSiH <sub>3</sub> | 3.0   | none     | ...   | PhMe            | 100       | 42                                 | 54                               |
| 10                 | 2.0                          | 1.0                             | Cu(OAc) <sub>2</sub>  | 10    | DPPB                | 20    | PhSiH <sub>3</sub> | 3.0   | none     | ...   | PhMe            | 100       | 45                                 | 69                               |
| 11                 | 1.5                          | 1.0                             | CuCl                  | 10    | DPPB                | 20    | PhSiH <sub>3</sub> | 3.0   | none     | ...   | PhMe            | 100       | 25                                 | 0                                |
| 12                 | 1.5                          | 1.0                             | CuOTf•PhMe            | 10    | DPPB                | 20    | PhSiH <sub>3</sub> | 3.0   | none     | ...   | PhMe            | 100       | n.r.                               | 0                                |
| 13                 | 1.5                          | 1.0                             | Cu <sub>2</sub> O     | 10    | DPPB                | 20    | PhSiH <sub>3</sub> | 3.0   | none     | ...   | PhMe            | 100       | 0                                  | 60                               |
| 14                 | 1.0                          | 1.5                             | Cu(OAc) <sub>2</sub>  | 10    | DPPB                | 20    | PhSiH <sub>3</sub> | 3.0   | none     | ...   | xylenes         | 100       | 55                                 | 35                               |
| 15                 | 1.0                          | 1.5                             | Cu(OAc) <sub>2</sub>  | 10    | DPPB                | 20    | PhSiH <sub>3</sub> | 3.0   | none     | ...   | DMF             | 100       | 10                                 | 10                               |
| 16                 | 1.0                          | 1.5                             | Cu(OAc) <sub>2</sub>  | 10    | DPPB                | 20    | PhSiH <sub>3</sub> | 3.0   | none     | ...   | DME             | 100       | 23                                 | 74                               |
| 17                 | 1.0                          | 1.5                             | Cu(OAc) <sub>2</sub>  | 10    | DPPB                | 20    | PhSiH <sub>3</sub> | 3.0   | none     | ...   | 1,4-dioxane     | 100       | 56                                 | 40                               |
| 18                 | 1.0                          | 1.5                             | Cu(OAc) <sub>2</sub>  | 10    | DPPB                | 20    | PhSiH <sub>3</sub> | 3.0   | none     | ...   | DCE             | 100       | 52                                 | 42                               |

| Entry <sup>a</sup> | ArNO <sub>2</sub><br>(equiv) | ArB(OH) <sub>2</sub><br>(equiv) | catalyst                | mol % | ligand | mol % | silane             | equiv | additive                       | mol % | solvent (0.1 M)              | T<br>(°C) | %, Yield<br><b>3a</b> | %, Yield<br>aniline |
|--------------------|------------------------------|---------------------------------|-------------------------|-------|--------|-------|--------------------|-------|--------------------------------|-------|------------------------------|-----------|-----------------------|---------------------|
| 19                 | 1.0                          | 1.5                             | Cu(OAc) <sub>2</sub>    | 10    | DPPB   | 20    | PhSiH <sub>3</sub> | 3.0   | none                           | ...   | EtOH                         | 100       | n.r.                  | n.r                 |
| 20                 | 1.0                          | 1.5                             | Cu(OAc) <sub>2</sub>    | 10    | DPPB   | 20    | PhSiH <sub>3</sub> | 3.0   | none                           | ...   | MeCN                         | 100       | 52                    | 28                  |
| 21                 | 1.0                          | 1.5                             | Cu(OAc) <sub>2</sub>    | 10    | DPPB   | 20    | PhSiH <sub>3</sub> | 3.0   | AcOH                           | 10    | MeCN                         | 100       | 46                    | 33                  |
| 22                 | 1.0                          | 1.5                             | Cu(OAc) <sub>2</sub>    | 10    | DPPB   | 20    | PhSiH <sub>3</sub> | 3.0   | K <sub>2</sub> CO <sub>3</sub> | 10    | MeCN                         | 100       | 0                     | 45                  |
| 23                 | 1.0                          | 1.5                             | Cu(OAc) <sub>2</sub>    | 10    | DPPB   | 20    | PhSiH <sub>3</sub> | 3.0   | KO <sup>t</sup> Bu             | 10    | MeCN                         | 100       | 24                    | 50                  |
| 24                 | 1.0                          | 1.5                             | Cu(OAc) <sub>2</sub>    | 10    | DPPB   | 20    | PhSiH <sub>3</sub> | 3.0   | CsF                            | 10    | MeCN                         | 100       | 39                    | 28                  |
| 25                 | 1.0                          | 1.5                             | Cu(OAc) <sub>2</sub>    | 10    | DPPB   | 20    | PhSiH <sub>3</sub> | 3.0   | MgO                            | 10    | MeCN                         | 100       | 44                    | 32                  |
| 26                 | 1.0                          | 1.5                             | Cu(OAc) <sub>2</sub>    | 10    | DPPB   | 10    | PhSiH <sub>3</sub> | 3.0   | none                           | ...   | MeCN                         | 100       | 42                    | 48                  |
| 27                 | 1.0                          | 1.5                             | Cu(OAc) <sub>2</sub>    | 5     | DPPB   | 10    | PhSiH <sub>3</sub> | 3.0   | none                           | ...   | MeCN                         | 100       | 55                    | 26                  |
| 28                 | 1.0                          | 1.5                             | Cu(OAc) <sub>2</sub>    | 2     | DPPB   | 4     | PhSiH <sub>3</sub> | 3.0   | none                           | ...   | MeCN                         | 100       | 50                    | 31                  |
| 29                 | 1.0                          | 1.5                             | Cu(OAc) <sub>2</sub>    | 1     | DPPB   | 2     | PhSiH <sub>3</sub> | 3.0   | none                           | ...   | MeCN                         | 100       | 31                    | 47                  |
| 30                 | 1.0                          | 1.5                             | CuCl <sub>2</sub>       | 5     | DPPB   | 10    | PhSiH <sub>3</sub> | 3.0   | none                           | ...   | MeCN                         | 100       | 35                    | 50                  |
| 31                 | 1.0                          | 1.5                             | CuCl <sub>2</sub>       | 5     | DPPB   | 10    | PhSiH <sub>3</sub> | 3.0   | AgClO <sub>4</sub>             | 10    | MeCN                         | 100       | 0                     | 64                  |
| 32                 | 1.0                          | 1.5                             | CuCl <sub>2</sub>       | 5     | DPPB   | 10    | PhSiH <sub>3</sub> | 3.0   | AgSbF <sub>6</sub>             | 10    | MeCN                         | 100       | 0                     | 80                  |
| 34                 | 1.0                          | 1.5                             | Cu(acac) <sub>2</sub>   | 5     | DPPB   | 10    | PhSiH <sub>3</sub> | 3.0   | none                           | ...   | MeCN                         | 100       | 50                    | 21                  |
| 34                 | 1.0                          | 1.5                             | Cu(tfacac) <sub>2</sub> | 5     | DPPB   | 10    | PhSiH <sub>3</sub> | 3.0   | none                           | ...   | MeCN                         | 100       | 45                    | 28                  |
| 35                 | 1.0                          | 1.5                             | CuSO <sub>4</sub>       | 5     | DPPB   | 10    | PhSiH <sub>3</sub> | 3.0   | none                           | ...   | MeCN                         | 100       | 36                    | 34                  |
| 36                 | 1.0                          | 1.5                             | Cu(TFA) <sub>2</sub>    | 5     | DPPB   | 10    | PhSiH <sub>3</sub> | 3.0   | none                           | ...   | MeCN                         | 100       | 55                    | 25                  |
| 37                 | 1.0                          | 1.5                             | Cu(OAc) <sub>2</sub>    | 5     | DPPB   | 10    | PhSiH <sub>3</sub> | 3.0   | none                           | ...   | MeCN                         | 80        | 61                    | 24                  |
| 38                 | 1.0                          | 1.5                             | Cu(OAc) <sub>2</sub>    | 5     | DPPB   | 10    | PhSiH <sub>3</sub> | 3.0   | none                           | ...   | MeCN                         | 60        | 63                    | 33                  |
| 39                 | 1.0                          | 1.5                             | Cu(OAc) <sub>2</sub>    | 5     | DPPB   | 10    | PhSiH <sub>3</sub> | 3.0   | none                           | ...   | MeCN                         | 40        | 21                    | 8                   |
| 40                 | 1.0                          | 1.5                             | Cu(OAc) <sub>2</sub>    | 5     | DPPB   | 10    | PhSiH <sub>3</sub> | 3.0   | none                           | ...   | MeCN                         | RT        | n.r.                  | n.r.                |
| 41                 | 1.0                          | 1.5                             | Cu(OAc) <sub>2</sub>    | 10    | DPPB   | 20    | PhSiH <sub>3</sub> | 3.0   | none                           | ...   | MeCN/PhMe (9:1)              | 60        | 55                    | 25                  |
| 42                 | 1.0                          | 1.5                             | Cu(OAc) <sub>2</sub>    | 10    | DPPB   | 20    | PhSiH <sub>3</sub> | 3.0   | none                           | ...   | MeCN/PhMe (4:1)              | 60        | 70                    | 20                  |
| 43                 | 1.0                          | 1.5                             | Cu(OAc) <sub>2</sub>    | 10    | DPPB   | 20    | PhSiH <sub>3</sub> | 3.0   | none                           | ...   | MeCN/PhMe (1:1)              | 60        | 76                    | 18                  |
| 44                 | 1.0                          | 1.5                             | Cu(OAc) <sub>2</sub>    | 10    | DPPB   | 20    | PhSiH <sub>3</sub> | 3.0   | none                           | ...   | MeCN/xylenes (1:1)           | 60        | 55                    | 26                  |
| 45                 | 1.0                          | 1.5                             | Cu(OAc) <sub>2</sub>    | 10    | DPPB   | 20    | PhSiH <sub>3</sub> | 3.0   | none                           | ...   | MeCN/PhCF <sub>3</sub> (1:1) | 60        | 65                    | 24                  |
| 46                 | 1.0                          | 1.5                             | Cu(OAc) <sub>2</sub>    | 10    | DPPB   | 20    | PhSiH <sub>3</sub> | 3.0   | none                           | ...   | MeCN/iPrOAc (1:1)            | 60        | 61                    | 25                  |
| 47                 | 1.0                          | 1.5                             | Cu(OAc) <sub>2</sub>    | 10    | DPPB   | 20    | PhSiH <sub>3</sub> | 3.0   | none                           | ...   | MeCN/DCE (1:1)               | 60        | 67                    | 29                  |
| 48                 | 1.0                          | 1.5                             | Cu(OAc) <sub>2</sub>    | 5     | DPPB   | 10    | PhSiH <sub>3</sub> | 3.0   | none                           | ...   | MeCN/DMF (1:1)               | 60        | 60                    | 19                  |
| 49                 | 1.0                          | 1.5                             | Cu(OAc) <sub>2</sub>    | 5     | DPPB   | 10    | PhSiH <sub>3</sub> | 3.0   | none                           | ...   | MeCN/PhCF <sub>3</sub> (1:1) | 60        | 65                    | 24                  |
| 50                 | 1.0                          | 1.5                             | Cu(OAc) <sub>2</sub>    | 5     | DPPB   | 10    | PhSiH <sub>3</sub> | 3.0   | none                           | ...   | MeCN/PhMe (1:1) <sup>b</sup> | 60        | 60                    | 24                  |

| Entry <sup>a</sup> | ArNO <sub>2</sub><br>(equiv) | ArB(OH) <sub>2</sub><br>(equiv) | catalyst             | mol % | ligand            | mol % | silane                   | equiv | additive | mol % | solvent (0.1 M)              | T<br>(°C) | %, Yield<br><b>3a</b> | %, Yield<br>aniline |
|--------------------|------------------------------|---------------------------------|----------------------|-------|-------------------|-------|--------------------------|-------|----------|-------|------------------------------|-----------|-----------------------|---------------------|
| 51                 | 1.0                          | 1.5                             | Cu(OAc) <sub>2</sub> | 5     | DPPB              | 10    | PhSiH <sub>3</sub>       | 3.0   | none     | ...   | MeCN/PhMe (1:1) <sup>c</sup> | 60        | 60                    | 24                  |
| 52                 | 1.0                          | 1.5                             | Cu(OAc) <sub>2</sub> | 5     | DPPP              | 10    | PhSiH <sub>3</sub>       | 3.0   | none     | ...   | MeCN/PhMe (1:1)              | 60        | 55                    | 27                  |
| 53                 | 1.0                          | 1.5                             | Cu(OAc) <sub>2</sub> | 5     | Davephos          | 10    | PhSiH <sub>3</sub>       | 3.0   | none     | ...   | MeCN/PhMe (1:1)              | 60        | 31                    | 50                  |
| 54                 | 1.0                          | 1.5                             | Cu(OAc) <sub>2</sub> | 5     | DPEPhos           | 20    | PhSiH <sub>3</sub>       | 3.0   | none     | ...   | MeCN/PhMe (1:1)              | 60        | 31                    | 26                  |
| 55                 | 1.0                          | 1.5                             | Cu(OAc) <sub>2</sub> | 5     | BINAP             | 10    | PhSiH <sub>3</sub>       | 3.0   | none     | ...   | MeCN/PhMe (1:1)              | 60        | 33                    | 37                  |
| 56                 | 1.0                          | 1.5                             | Cu(OAc) <sub>2</sub> | 5     | Ph <sub>3</sub> P | 20    | PhSiH <sub>3</sub>       | 3.0   | none     | ...   | MeCN/PhMe (1:1)              | 60        | 0                     | 89                  |
| 57                 | 1.0                          | 1.5                             | Cu(OAc) <sub>2</sub> | 5     | 1,10-phen         | 10    | PhSiH <sub>3</sub>       | 3.0   | none     | ...   | MeCN/PhMe (1:1)              | 60        | 0                     | 90                  |
| 58                 | 1.0                          | 1.5                             | Cu(OAc) <sub>2</sub> | 5     | DPPB              | 10    | Me <sub>2</sub> ClSiH    | 4.0   | none     | ...   | MeCN/PhMe (1:1)              | 60        | n.r.                  | n.r.                |
| 59                 | 1.0                          | 1.5                             | Cu(OAc) <sub>2</sub> | 5     | DPPB              | 10    | iPr <sub>3</sub> SiH     | 4.0   | none     | ...   | MeCN/PhMe (1:1)              | 60        | n.r.                  | n.r.                |
| 60                 | 1.0                          | 1.5                             | Cu(OAc) <sub>2</sub> | 5     | DPPB              | 10    | (MeO) <sub>2</sub> MeSiH | 4.0   | none     | ...   | MeCN/PhMe (1:1)              | 60        | 27                    | 48                  |
| 61                 | 1.0                          | 1.5                             | Cu(OAc) <sub>2</sub> | 5     | DPPB              | 10    | BnMe <sub>2</sub> SiH    | 4.0   | none     | ...   | MeCN/PhMe (1:1)              | 60        | n.r.                  | n.r.                |
| 62                 | 1.0                          | 1.5                             | Cu(OAc) <sub>2</sub> | 5     | DPPB              | 10    | PHMS                     | 4.0   | none     | ...   | MeCN/PhMe (1:1)              | 60        | 27                    | 48                  |
| 63                 | 1.0                          | 1.5                             | Cu(OAc) <sub>2</sub> | 5     | DPPB              | 10    | PhSiH <sub>3</sub>       | 3.2   | none     | ...   | MeCN/PhMe (1:1)              | 60        | 70                    | 18                  |
| 64                 | 1.0                          | 1.5                             | Cu(OAc) <sub>2</sub> | 5     | DPPB              | 10    | PhSiH <sub>3</sub>       | 3.4   | none     | ...   | MeCN/PhMe (1:1)              | 60        | 62                    | 21                  |
| 65                 | 1.0                          | 1.5                             | Cu(OAc) <sub>2</sub> | 5     | DPPB              | 10    | PhSiH <sub>3</sub>       | 3.6   | none     | ...   | MeCN/PhMe (1:1)              | 60        | 28                    | 58                  |
| 66                 | 1.0                          | 1.5                             | Cu(OAc) <sub>2</sub> | 5     | DPPB              | 10    | PhSiH <sub>3</sub>       | 2.8   | none     | ...   | MeCN/PhMe (1:1)              | 60        | 83                    | 16                  |
| 67                 | 1.0                          | 1.5                             | Cu(OAc) <sub>2</sub> | 5     | DPPB              | 10    | PhSiH <sub>3</sub>       | 2.6   | none     | ...   | MeCN/PhMe (1:1)              | 60        | 83                    | 20                  |
| 68                 | 1.0                          | 1.5                             | Cu(OAc) <sub>2</sub> | 5     | DPPB              | 10    | PhSiH <sub>3</sub>       | 2.4   | none     | ...   | MeCN/PhMe (1:1)              | 60        | 55                    | 17                  |

<sup>a</sup> As determined using <sup>1</sup>H NMR spectroscopy with CH<sub>2</sub>Br<sub>2</sub> as the internal standard. <sup>b</sup> 0.2 M solution. <sup>c</sup> 0.05 M solution.



## B. Optimized Conditions

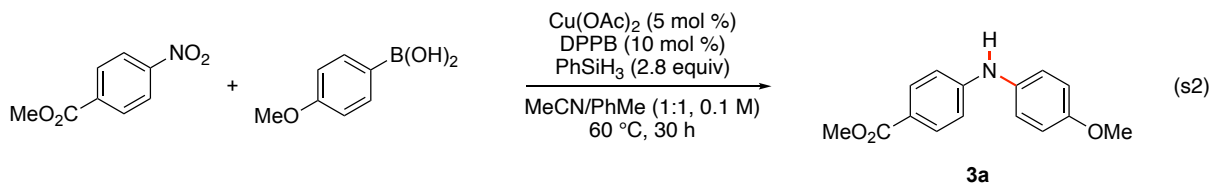

To a 10 mL Schlenk tube under nitrogen was added 0.10 mmol of nitroarene and 0.15 mmol of arylboronic acid. A solution of  $\text{Cu}(\text{OAc})_2$  (5 mol %) and 1,4-bis(diphenylphosphino)butane (dppb) (10 mol %) in 0.5 mL of MeCN were then added. The resulting mixture was diluted with 0.5 mL of toluene, and 0.0303 g of phenyl silane (2.8 equiv) was added in one portion before the Schlenk tube was sealed under nitrogen. The reaction mixture was heated to 60 °C. After 30 h, analysis of the reaction mixture using thin layer chromatography indicated that the reaction was complete. The mixture was cooled to room temperature and filtered through a pad of silica gel. The filtrate was concentrated *in vacuo*, and the residue was purified using MPLC to afford diarylamine **3a**.

## C. Characterization Data

### 1. Scope and limitations with regards to the nitroarene

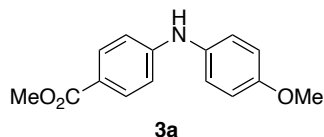

**Methyl 4-((4-methoxyphenyl)amino)benzoate 3a.**<sup>2</sup> The optimized method was followed by adding 0.0181 g of methyl 4-nitrobenzoate, 0.0228 g of 4-methoxyphenylboronic acid and 0.0009 g  $\text{Cu}(\text{OAc})_2$  and 0.0043 g of 1,4-bis(diphenylphosphino)butane (dppb) in 0.50 mL of MeCN. Then 0.50 mL of toluene and 0.0303 g of phenylsilane were sequentially added. Purification by MPLC (3:97 – 20:80 EtOAc:hexanes) afforded **3a** as a white solid (0.0214 g, 83%). The spectral data of **1a** matched that reported by Organ and co-workers:<sup>2</sup> mp = 83–84 °C;  $^1\text{H}$  NMR ( $\text{CDCl}_3$ , 500 MHz)  $\delta$  7.87 (d,  $J$  = 8.7 Hz, 2H), 7.13 (d,  $J$  = 8.9 Hz, 2H), 6.90 (d,  $J$  = 8.9 Hz, 2H), 6.80 (d,  $J$  = 8.7 Hz, 2H), 5.92 (s, 1H), 3.86 (s, 3H), 3.81 (s, 3H);  $^{13}\text{C}$  NMR ( $\text{CDCl}_3$ , 125 MHz)  $\delta$  167.1 (C), 156.6 (C), 149.8 (C), 133.3 (C), 131.5 (CH), 124.5 (CH), 120.0 (C), 114.8 (CH), 113.2 (CH), 55.6 (CH<sub>3</sub>), 51.6 (CH<sub>3</sub>); IR (thin film): 3384, 2954, 2801, 1690, 1595, 1520, 1448, 1411, 1346, 1248, 1236, 798, 763, 690  $\text{cm}^{-1}$ .

**1 mmol scale reaction to afford methyl 4-((4-methoxyphenyl)amino)benzoate 3a.** The optimized method was followed by adding 0.181 g of methyl 4-nitrobenzoate, 0.228 g of 4-methoxyphenylboronic acid and 0.009 g  $\text{Cu}(\text{OAc})_2$  and 0.043 g of 1,4-bis(diphenylphosphino)butane (dppb) in 5.00 mL of MeCN. Then 5.00 mL of toluene and 0.303 g of phenylsilane were sequentially added. Purification by MPLC (3:97 – 20:80 EtOAc:hexanes) afforded **3a** as a white solid (0.209 g, 81%).

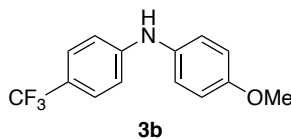

**4-Methoxy-N-(4-(trifluoromethyl)phenyl)aniline 3b.**<sup>3</sup> The optimized method was followed by adding 0.0191 g of 4-nitrobenzotrifluoride, 0.0228 g of 4-methoxyphenylboronic acid and 0.50 mL of MeCN solution of 0.0009 g  $\text{Cu}(\text{OAc})_2$  and 0.0043 g of 1,4-bis(diphenylphosphino)butane (dppb). Then 0.50 mL of toluene and 0.0303 g of phenylsilane were sequentially added. Purification by MPLC (3:97 – 20:80 EtOAc:hexanes) afforded **3b** as a dark brown foam (0.0224 g,

2. Pompeo, M.; Farmer, J.L.; Froese, R. D. J.; Organ, M.G. *Angew. Chem. Int. Ed.* **2014**, *53*, 3223.

84%). The spectral data of **3b** matched that reported by Nocera and co-workers:<sup>3</sup> <sup>1</sup>H NMR (CDCl<sub>3</sub>, 500 MHz) δ 7.42 (d, *J* = 8.8 Hz, 2H), 7.12 (d, *J* = 8.9 Hz, 2H), 6.91 (d, *J* = 8.9 Hz, 2H), 6.86 (d, *J* = 8.8 Hz, 2H), 5.72 (s, 1H), 3.82 (s, 3H); <sup>13</sup>C NMR (CDCl<sub>3</sub>, 125 MHz) δ 156.5 (C), 148.6 (C), 133.7 (C), 126.7 (q, *J*<sub>CF</sub> = 3.7 Hz, CH), 124.7 (q, *J*<sub>CF</sub> = 270.3 Hz, C), 124.3 (CH), 120.6 (q, *J*<sub>CF</sub> = 32.8 Hz, C), 114.8 (CH), 113.7 (CH), 55.7 (CH<sub>3</sub>); <sup>19</sup>F NMR (CDCl<sub>3</sub>, 282 MHz) δ -61.2; IR (thin film): 3415, 2936, 2837, 1670, 1563, 1454, 1377, 1150, 797 cm<sup>-1</sup>.

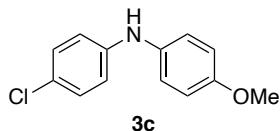

**N-(4-Methoxyphenyl)-4-chloroaniline 3c.**<sup>4</sup> The optimized method was followed by adding 0.0158 g of 4-chloro-1-nitrobenzene, 0.0228 g of 4-methoxyphenylboronic acid and 0.50 mL of MeCN solution of 0.0009 g Cu(OAc)<sub>2</sub> and 0.0043 g of 1,4-bis(diphenylphosphino)butane (dppb). Then 0.50 mL of toluene and 0.0303 g of phenylsilane were sequentially added. Purification by MPLC (3:97 – 20:80 EtOAc:hexanes) afforded **3c** as a pale yellow foam (0.0199 g, 85%). The spectral data of **3c** matched that reported by Fort and co-workers:<sup>4</sup> <sup>1</sup>H NMR (CDCl<sub>3</sub>, 500 MHz) δ 7.22 (t, *J* = 7.5 Hz, 2H), 7.08 (s, 2H), 6.92 – 6.83 (m, 5H), 5.50 (s, 1H), 3.81 (s, 3H); <sup>13</sup>C NMR (CDCl<sub>3</sub>, 125 MHz) δ 155.6 (C), 151.8 (C), 135.2 (CH), 129.2 (C), 124.0 (CH), 122.6 (CH), 116.7 (CH), 114.8 (C), 55.6 (CH<sub>3</sub>); IR (thin film): 3379, 3010, 2954, 2838, 1562, 1521, 1499, 1387, 783, 695 cm<sup>-1</sup>.

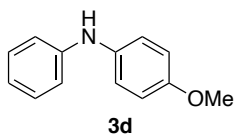

**4-Methoxy-N-phenylaniline 3d.**<sup>5</sup> The optimized method was followed by adding 0.0123 g of nitrobenzene, 0.0228 g of 4-methoxyphenylboronic acid and 0.50 mL of MeCN solution of 0.0009 g Cu(OAc)<sub>2</sub> and 0.0043 g of 1,4-bis(diphenylphosphino)butane (dppb). Then 0.50 mL of toluene and 0.0303 g of phenylsilane were sequentially added. Purification by MPLC (3:97 – 20:80 EtOAc:hexanes) afforded **3d** as a pale yellow solid (0.0132 g, 66%). The spectral data of **3d** matched that reported by Lavigne and Cesar and co-workers:<sup>5</sup> mp = 104–106 °C; <sup>1</sup>H NMR (CDCl<sub>3</sub>, 500 MHz) δ 7.15 (d, *J* = 10.0 Hz, 2H), 7.05 (s, 2H), 6.87 (d, *J* = 10.0 Hz, 2H), 6.81 (s, 2H), 5.49 (s, 1H), 3.80 (s, 3H); <sup>13</sup>C NMR (CDCl<sub>3</sub>, 125 MHz) δ 155.3 (C), 145.2 (C), 129.3 (CH), 122.2 (CH), 119.6 (CH), 115.7 (CH), 114.7 (CH), 55.6 (CH<sub>3</sub>) only signals visible; IR (thin film): 3387, 3013, 2960, 2841, 1561, 1507, 1498, 1443, 1307, 1252, 1236, 750, 693 cm<sup>-1</sup>.

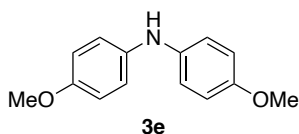

**N-(4-Methoxyphenyl)-4-methoxyaniline 3e.** The optimized method was followed by adding 0.0153 g of 4-nitroanisole, 0.0228 g of 4-methoxyphenylboronic acid and 0.50 mL of MeCN solution of 0.0009 g Cu(OAc)<sub>2</sub> and 0.0043g 1,4-bis(diphenylphosphino)butane (dppb). Then 0.50 mL of toluene and 0.0303 g of phenylsilane were sequentially added. The cross-coupling product was not observed and 4-nitroanisole starting material was recovered.

3. Sun, R.; Qin, Y.; Nocera, D.G. *Angew. Chem. Int. Ed.* **2020**, *59*, 9527.

4. Desmarests, C.; Schneider, R.; Fort, Y. *J. Org. Chem.* **2002**, *67*, 3029.

5. Zhang, Y.; Cesar V.; Storch, G.; Lugan N.; Lavigne, G. *Angew. Chem. Int. Ed.* **2014**, *53*, 6482.

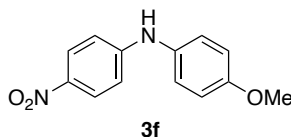

***N*-(4-Methoxyphenyl)-4-nitroaniline 3f.**<sup>6</sup> The optimized method was followed by adding 0.0168 g of 1,4-dinitrobenzene, 0.0228 g of 4-methoxyphenylboronic acid and 0.50 mL of MeCN solution of 0.0009 g Cu(OAc)<sub>2</sub> and 0.0043 g of 1,4-bis(diphenylphosphino)butane (dppb). Then 0.50 mL of toluene and 0.0303 g of phenylsilane were sequentially added. Purification by MPLC (3:97 – 20:80 EtOAc:hexanes) afforded **3f** as a brown solid (0.0144 g, 59%). The spectral data of **3f** matched that reported by Buchwald and co-workers:<sup>6</sup> mp = 137–140 °C; <sup>1</sup>H NMR (CDCl<sub>3</sub>, 500 MHz) δ 8.09 (d, *J* = 9.3 Hz, 2H), 7.16 (d, *J* = 8.9 Hz, 2H), 6.94 (d, *J* = 9.3 Hz, 2H), 6.77 (d, *J* = 9.3 Hz, 2H), 6.10 (s, 1H), 3.84 (s, 3H); <sup>13</sup>C NMR (CDCl<sub>3</sub>, 125 MHz) δ 157.5 (C), 151.8 (C), 139.1 (C), 132.0 (C), 126.4 (CH), 125.5 (CH), 115.0 (CH), 112.6 (CH), 55.6 (CH<sub>3</sub>); IR (thin film): 3326, 3199, 3124, 2953, 2835, 1592, 1511, 1482, 1444, 1293, 1230, 762, 749, 697 cm<sup>-1</sup>.

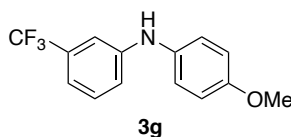

***N*-(4-Methoxyphenyl)-3-(trifluoromethyl)aniline 3g.**<sup>4</sup> The optimized method was followed by adding 0.0191 g of 3-(trifluoromethyl)nitrobenzene, 0.0228 g of 4-methoxyphenylboronic acid and 0.50 mL of MeCN solution of 0.0009 g Cu(OAc)<sub>2</sub> and 0.0043 g of 1,4-bis(diphenylphosphino)butane (dppb). Then 0.50 mL of toluene and 0.0303 g of phenylsilane were sequentially added. Purification by MPLC (3:97 – 20:80 EtOAc:hexanes) afforded **3g** as a white solid (0.0238 g, 89%). The spectral data of **3g** matched that reported by Lavigne and Cesar and co-workers:<sup>4</sup> mp = 56–58 °C; <sup>1</sup>H NMR (500 MHz; CDCl<sub>3</sub>) δ <sup>1</sup>H NMR (501 MHz, CDCl<sub>3</sub>) δ 7.29 (t, *J* = 7.9 Hz, 1H), 7.13 – 7.05 (m, 3H), 7.03 (d, *J* = 7.6 Hz, 1H), 7.00 (d, *J* = 7.6 Hz, 1H), 6.90 (d, *J* = 8.8 Hz, 2H), 5.62 (s, 1H), 3.82 (s, 3H). <sup>13</sup>C NMR (CDCl<sub>3</sub>, 125 MHz) δ 156.2 (C), 146.0 (C), 134.3 (C), 131.6 (q, *J*<sub>CF</sub> = 31.7 Hz, C), 129.8 (CH), 124.2 (q, *J*<sub>CF</sub> = 272.5 Hz, C), 123.5 (CH), 117.9 (CH), 115.6 (q, *J*<sub>CF</sub> = 3.8 Hz, C), 114.9 (CH), 111.3 (q, *J*<sub>CF</sub> = 3.8 Hz, CH), 55.5 (CH<sub>3</sub>); <sup>19</sup>F NMR (CDCl<sub>3</sub>, 282 MHz) δ –62.8; IR (thin film): 3421, 2944, 2812, 1673, 1559, 1421, 1375, 1141, 772 cm<sup>-1</sup>.

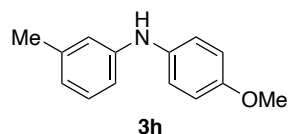

***N*-(4-Methoxyphenyl)-3-methylaniline 3h.**<sup>5</sup> The optimized method was followed by adding 0.0137 g of 3-nitrotoluene, 0.0228 g of 4-methoxyphenylboronic acid and 0.50 mL of MeCN solution of 0.0009 g Cu(OAc)<sub>2</sub> and 0.0043 g of 1,4-bis(diphenylphosphino)butane (dppb). Then 0.50 mL of toluene and 0.0303 g of phenylsilane were sequentially added. Purification by MPLC (3:97 – 20:80 EtOAc:hexanes) afforded **3h** as a yellow oil (0.0156 g, 73%). The spectral data of **3h** matched that reported by Fort and co-workers:<sup>5</sup> <sup>1</sup>H NMR (500 MHz; CDCl<sub>3</sub>) δ 7.13 – 7.05 (m, 3H), 6.87 (d, *J* = 8.8 Hz, 2H), 6.73 (d, *J* = 7.7 Hz, 2H), 6.67 (d, *J* = 6.6 Hz, 1H), 3.81 (s, 3H), 2.29 (s, 3H). <sup>13</sup>C NMR (CDCl<sub>3</sub>, 125 MHz) δ 155.3 (C), 145.2 (C), 139.2 (C), 129.2 (CH), 124.4 (C), 122.3 (CH), 120.6 (CH), 116.4 (CH), 114.7 (CH), 112.9 (CH), 55.6 (CH<sub>3</sub>), 21.6 (CH<sub>3</sub>); IR (thin film): 3406, 2956, 2817, 1665, 1523, 1436, 1354, 1014, 912, 772 cm<sup>-1</sup>.

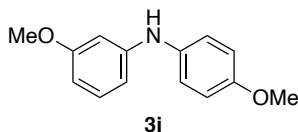

***N*-(4-Methoxyphenyl)-3-methoxyaniline 3i.**<sup>7</sup> The optimized method was followed by adding 0.0153 g of 4-nitroanisole, 0.0228 g of 4-methoxyphenylboronic acid and 0.50 mL of MeCN solution of 0.0009 g Cu(OAc)<sub>2</sub> and 0.0043 g of 1,4-

bis(diphenylphosphino)butane (dppb). Then 0.50 mL of toluene and 0.0303 g of phenylsilane were sequentially added. Purification by MPLC (3:97 – 20:80 EtOAc:hexanes) afforded **3i** as a white foam (0.0195 g, 85%). The spectral data of **3i** matched that reported by Hartwig and co-workers:<sup>7</sup> <sup>1</sup>H NMR (CDCl<sub>3</sub>, 500 MHz) δ 7.21 – 7.04 (m, 3H), 6.86 (d, *J* = 8.8 Hz, 2H), 6.58 – 6.42 (m, 2H), 6.40 (d, *J* = 7.8 Hz, 1H), 5.62 (s, 1H), 3.80 (s, 3H), 3.76 (s, 3H); <sup>13</sup>C NMR (CDCl<sub>3</sub>, 125 MHz) δ 160.8 (C), 155.5 (C), 146.7 (C), 135.4 (C), 130.1 (CH), 122.8 (CH), 114.7 (CH), 108.4 (CH), 104.8 (CH), 101.4 (CH), 55.6 (CH<sub>3</sub>), 55.2 (CH<sub>3</sub>); IR (thin film): 3380, 2924, 2071, 1634, 1414, 1379, 952 cm<sup>-1</sup>.

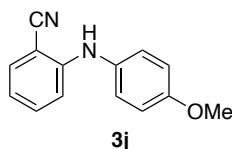

**2-[(4-Methoxyphenyl)amino]benzonitrile 3j.**<sup>8</sup> The optimized method was followed by adding 0.0148 g of 2-nitrobenzonitrile, 0.0228 g of 4-methoxyphenylboronic acid and 0.50 mL of MeCN solution of 0.0009 g Cu(OAc)<sub>2</sub> and 0.0043 g of 1,4-bis(diphenylphosphino)butane (dppb). Then 0.50 mL of toluene and 0.0303 g of phenylsilane were sequentially added. Purification by MPLC (3:97 – 20:80 EtOAc:hexanes) afforded **3j** as a white solid (0.0186 g, 83%). The spectral data of **3j** matched that reported by Zeng and co-workers:<sup>8</sup> mp = 118–120 °C; <sup>1</sup>H NMR (500 MHz; CDCl<sub>3</sub>) δ 7.46 (d, *J* = 5.0 Hz, 1H), 7.31 (t, *J* = 5.0 Hz, 1H), 7.15 (d, *J* = 5.0 Hz, 2H), 6.93–6.89 (m, 3H), 6.75 (t, *J* = 5.0 Hz, 1H), 6.18 (s, 1H), 3.83 (s, 3H); <sup>13</sup>C NMR (CDCl<sub>3</sub>, 125 MHz) δ 157.3 (C), 149.0 (C), 134.0 (CH), 132.9 (CH), 132.3 (C), 125.7 (CH), 118.1 (CH), 117.8 (C), 114.9 (CH), 112.9 (CH), 96.9 (CN), 55.6 (CH<sub>3</sub>); IR (thin film): 3392, 2921, 2852, 2241, 1317, 1290, 1203, 966 cm<sup>-1</sup>.

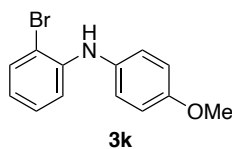

**N-(4-Methoxyphenyl)-2-bromoaniline 3k.** The optimized method was followed by adding 0.0202 g of 2-bromo-1-nitrobenzene, 0.0228 g of 4-methoxyphenylboronic acid and 0.50 mL of MeCN solution of 0.0009 g Cu(OAc)<sub>2</sub> and 0.0043 g of 1,4-bis(diphenylphosphino)butane (dppb). Then 0.50 mL of toluene and 0.0303 g of phenylsilane were sequentially added. Purification by MPLC (3:97 – 20:80 EtOAc:hexanes) afforded **3k** as a yellow oil (0.0248 g, 89%). The spectral data of **3k** matched that reported by Martin, Rossi and co-workers:<sup>9</sup> <sup>1</sup>H NMR (CDCl<sub>3</sub>, 500 MHz) δ 7.48 (d, *J* = 10.0 Hz, 1H), 7.14 – 7.08 (m, 3H), 6.95 – 6.89 (m, 3H), 6.65 (t, *J* = 5.0 Hz, 1H), 5.94 (s, 1H), 3.82 (s, 3H); <sup>13</sup>C NMR (CDCl<sub>3</sub>, 125 MHz) δ 156.4 (C), 143.3 (C), 134.2 (C), 132.8 (CH), 128.2 (CH), 124.7 (CH), 119.6 (CH), 114.8 (CH), 114.0 (CH), 110.6 (C), 55.6 (CH<sub>3</sub>); IR (thin film): 3401, 3061, 2925, 2878, 1603, 1422, 1250, 947 cm<sup>-1</sup>.

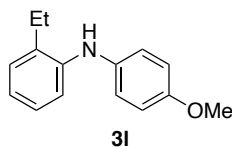

**N-(4-Methoxyphenyl)-2-ethylaniline 3l.**<sup>10</sup> The optimized method was followed by adding 0.0151 g of 2-ethyl-1-nitrobenzene, 0.0228 g of 4-methoxyphenylboronic acid and 0.50 mL of MeCN solution of 0.0009 g Cu(OAc)<sub>2</sub> and 0.0043 g of 1,4-bis(diphenylphosphino)butane (dppb). Then 0.50 mL of toluene and 0.0303 g of phenylsilane were sequentially added. Purification by MPLC (3:97 – 20:80 EtOAc:hexanes) afforded **3l** as a yellow oil (0.0186 g, 82%). The spectral data of **3l** matched that reported by Schmidt and co-workers:<sup>9</sup> <sup>1</sup>H NMR (CDCl<sub>3</sub>, 500 MHz) δ 7.19 (d, *J* = 5.0 Hz, 1H), 7.09 (t, *J*

7. Shen, Q.; Ogata, T.; Hartwig, J.F. *J. Am. Chem. Soc.* **2008**, *130*, 6586.

8. Rao, B.; Zeng, X. *Org. Lett.* **2014**, *16*, 314.

9. Budén, M. E.; Vaillard, V. A.; Martin, S. E.; Rossi, R. A. *J. Org. Chem.* **2009**, *74*, 4490.

10. Samblanet, D.C.; Schmidt, J.A.R. *J. Organomet. Chem.* **2012**, *720*, 7.

= 5.0 Hz, 1H), 7.04 – 6.99 (m, 3H), 6.90 – 6.85 (m, 3H), 3.80 (s, 3H), 2.62 (q,  $J = 5.0$  Hz, 2H), 1.29 (t,  $J = 5.0$  Hz, 3H);  $^{13}\text{C}$  NMR ( $\text{CDCl}_3$ , 125 MHz)  $\delta$  155.0 (C), 142.7 (C), 136.8 (C), 131.6 (C), 128.7 (CH), 126.7 (CH), 121.8 (CH), 120.5 (CH), 116.3 (CH), 114.7 (C), 55.6 ( $\text{CH}_3$ ), 24.2 ( $\text{CH}_2$ ), 13.5 ( $\text{CH}_3$ ); IR (thin film): 3422, 3038, 2961, 2928, 2833, 1595, 1500, 1294, 1243, 1033, 824, 747  $\text{cm}^{-1}$ .

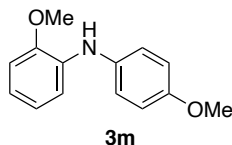

***N*-(4-Methoxyphenyl)-2-methoxyaniline 3m.**<sup>11</sup> The optimized method was followed by adding 0.0151 g of 2-ethyl-1-nitrobenzene, 0.0228 g of 4-methoxyphenylboronic acid and 0.50 mL of MeCN solution of 0.0009 g  $\text{Cu}(\text{OAc})_2$  and 0.0043 g of 1,4-bis(diphenylphosphino)butane (dppb). Then 0.50 mL of toluene and 0.0303 g of phenylsilane were sequentially added. Purification by MPLC (3:97 – 20:80 EtOAc:hexanes) afforded **3m** as a yellow oil (0.0165 g, 72%). The spectral data of **3m** matched that reported by Ichitsuka, Koumura, Kobayashi and co-workers:<sup>11</sup>  $^1\text{H}$  NMR ( $\text{CDCl}_3$ , 500 MHz)  $\delta$  7.13 (d,  $J = 10.0$  Hz, 2H), 7.04 (d,  $J = 5.0$  Hz, 1H), 6.88 – 6.76 (m, 5H), 5.98 (br s, 1H) 3.90 (s, 3H), 3.81 (s, 3H);  $^{13}\text{C}$  NMR ( $\text{CDCl}_3$ , 125 MHz)  $\delta$  155.3 (C), 147.4 (C), 135.4 (C), 135.0 (C), 122.8 (CH), 121.0 (CH), 118.6 (C), 114.6 (CH), 112.6 (CH), 110.2 (CH), 55.6 ( $\text{CH}_3$ ), only signals visible; IR (thin film): 3371, 2932, 1631, 1582, 1418, 1336, 929  $\text{cm}^{-1}$ .

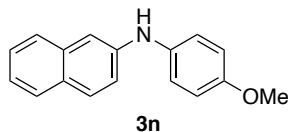

**Methyl 4-(naphthalen-2-ylamino)benzoate 3n.**<sup>17</sup> The optimized method was followed by adding 0.0173 g of 2-nitronaphthalene, 0.0228 g of 4-methoxyphenylboronic acid and 0.50 mL of MeCN solution of 0.0009 g  $\text{Cu}(\text{OAc})_2$  and 0.0043 g of 1,4-bis(diphenylphosphino)butane (dppb). Then 0.50 mL of toluene and 0.0303 g of phenylsilane were sequentially added. Purification by MPLC (3:97 – 20:80 EtOAc:hexanes) afforded **3n** as a yellow oil (0.0266 g, 96%). The spectral data of **3n** matched that reported by Deng, Huang and co-workers:<sup>12</sup>  $^1\text{H}$  NMR ( $\text{CDCl}_3$ , 500 MHz)  $\delta$  8.00 (dd,  $J = 5.0, 5.0$  Hz, 2H), 7.60 (d,  $J = 10.0$  Hz, 1H), 7.40 – 7.37 (m, 1H), 7.28 – 7.11 (m, 6H), 6.93 – 6.91 (m, 2H), 5.66 (s, 1H), 3.84 (s, 3H);  $^{13}\text{C}$  NMR ( $\text{CDCl}_3$ , 125 MHz)  $\delta$  153.2 (C), 149.0 (C), 134.2 (C), 128.6 (CH), 126.2 (CH), 126.0 (C), 125.4 (CH), 121.8 (CH), 121.1 (CH), 120.9 (CH), 114.8 (CH), 111.7 (CH), 55.6 ( $\text{CH}_3$ ), only signals visible; IR (thin film): 3461, 3358, 3037, 2944, 2339, 1673, 1665, 1521, 1466, 1256, 1030, 837, 742  $\text{cm}^{-1}$ .

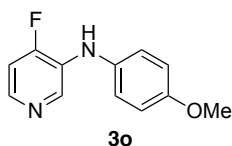

**4-Fluoro-*N*-(4-methoxyphenyl)pyridine-3-amine 3o.**<sup>13</sup> The optimized method was followed by adding 0.0142 g of 4-fluoro-3-nitropyridine, 0.0228 g of 4-methoxyphenylboronic acid and 0.50 mL of MeCN solution of 0.0009 g  $\text{Cu}(\text{OAc})_2$  and 0.0043 g of 1,4-bis(diphenylphosphino)butane (dppb). Then 0.50 mL of toluene and 0.0303 g of phenylsilane were sequentially added. Purification by MPLC (3:97 – 20:80 EtOAc:hexanes) afforded **3o** as a white solid (0.0164 g, 75%). The spectral data of **3o** matched that reported by Clark and co-workers:<sup>11</sup> mp = 122–126 °C;  $^1\text{H}$  NMR ( $\text{CDCl}_3$ , 500 MHz)  $\delta$  7.81 (s, 1H), 7.34 (m, 1H), 7.02 (d,  $J = 5$  Hz, 2H), 6.87 (d,  $J = 5$  Hz, 2H), 6.79 – 6.77 (m, 1H), 3.80 (s, 3H);  $^{13}\text{C}$  NMR ( $\text{CDCl}_3$ , 125 MHz)  $\delta$  158.7 (C), 155.8 (C), 139.7 (C), 135.2 (C), 134.8 (d,  $J = 14.8$  Hz, CH), 128.5 (d,  $J = 7.4$  Hz, CH), 121.9 (CH), 115.0 (CH), 109.4 (d,  $J = 39.3$  Hz, CH), 55.6 ( $\text{CH}_3$ ). IR (thin film): 3253, 3177, 3052, 2911, 2865, 1508, 1336, 1259, 1033  $\text{cm}^{-1}$ .

11. Ichitsuka, T.; Takahashi, I.; Koumura, N.; Sato, K.; Kobayashi, S. *Angew. Chem. Int. Ed.* **2020**, *59*, 15891.

12. Wang, Z.; Li, C.; Huang, H.; Deng, G-J. *J. Org. Chem.* **2020**, *85*, 9415.

13. Wilson, R. J.; Rosenberg, A. J.; Kaminsky, L.; Clark, D. A. *J. Org. Chem.* **2014**, *79*, 2203.

## 2. Scope and limitations with regards to the boronic acid

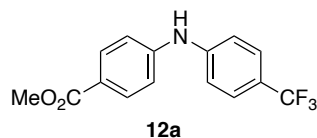

**Methyl 4-[4-(trifluoromethyl)anilino]benzoate 12a.** The optimized method was followed by adding 0.0181 g of methyl 4-nitrobenzoate, 0.0285 g of 4-trifluoromethylphenylboronic acid and 0.50 mL of MeCN solution of 0.0009 g Cu(OAc)<sub>2</sub> and 0.0043 g of 1,4-bis(diphenylphosphino)butane (dppb). Then 0.50 mL of toluene and 0.0303 g of phenylsilane were sequentially added. Purification by MPLC (3:97 – 20:80 EtOAc:hexanes) afforded **12a** as a white foam (0.0266 g, 90%). The spectral data of **12a** matched that reported by Winkler, Penning and co-workers:<sup>14</sup> <sup>1</sup>H NMR (CDCl<sub>3</sub>, 500 MHz) δ 7.97 (d, *J* = 5.0 Hz, 2H), 7.55 (d, *J* = 5.0 Hz, 2H), 7.19 (d, *J* = 5.0 Hz, 2H), 7.10 (d, *J* = 5.0 Hz, 2H), 6.18 (s, 1H), 3.90 (s, 3H); <sup>13</sup>C NMR (CDCl<sub>3</sub>, 125 MHz) δ 166.7 (C), 146.1 (C), 144.5 (C), 131.5 (CH), 126.8 (q, *J* = 3.6 Hz, CH), 124.6 (q, *J* = 270.6 Hz, C), 123.9 (C), 123.0 (C), 117.9 (CH), 116.4 (CH), 51.9 (CH<sub>3</sub>); <sup>19</sup>F NMR (CDCl<sub>3</sub>, 282 MHz) δ –61.8; IR (thin film) cm<sup>-1</sup>: 3403, 2955, 2844, 1685, 1401, 1314, 1225, 764 cm<sup>-1</sup>

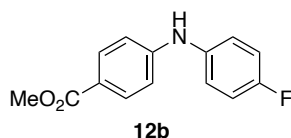

**Methyl 4-[4-fluorophenyl]amino]benzoate 12b.**<sup>12</sup> The optimized method was followed by adding 0.0181 g of methyl 4-nitrobenzoate, 0.0210 g of 4-fluorophenylboronic acid and 0.50 mL of MeCN solution of 0.0009 g Cu(OAc)<sub>2</sub> and 0.0043 g of 1,4-bis(diphenylphosphino)butane (dppb). Then 0.50 mL of toluene and 0.0303 g of phenylsilane were sequentially added. Purification by MPLC (3:97 – 20:80 EtOAc:hexanes) afforded **12b** as a pale yellow viscous oil (0.0238 g, 97%). The spectral data of **12b** matched that reported by Xue and co-workers:<sup>15</sup> <sup>1</sup>H NMR (CDCl<sub>3</sub>, 500 MHz) δ 7.90 (d, *J* = 8.4 Hz, 2H), 7.16 – 7.13 (m, 2H), 7.04 (t, *J* = 8.4 Hz, 2H), 6.87 (d, *J* = 8.8 Hz, 2H), 5.91 (s, 1H), 3.87 (s, 3H); <sup>13</sup>C NMR (CDCl<sub>3</sub>, 125 MHz) δ 167.3 (C), 159.5 (d, *J*<sub>CF</sub> = 241.3 Hz, C), 149.1 (C), 137.0 (d, *J*<sub>CF</sub> = 2.8 Hz, CH), 131.9 (CH), 123.7 (d, *J*<sub>CF</sub> = 8.1 Hz, CH), 121.1 (C), 116.6 (d, *J*<sub>CF</sub> = 22.5 Hz, CH), 114.2 (CH), 52.1 (CH<sub>3</sub>); <sup>19</sup>F NMR (CDCl<sub>3</sub>, 282 MHz) δ –118.7; IR (thin film): 3401, 1687, 1579, 1461, 1413, 1245, 752 cm<sup>-1</sup>.

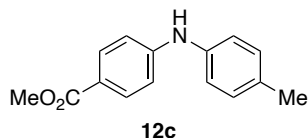

**Methyl 4-(tolylamino)benzoate 12c.**<sup>13</sup> The optimized method was followed by adding 0.0181 g of methyl 4-nitrobenzoate, 0.0204 g of 4-tolylboronic acid and 0.50 mL of MeCN solution of 0.0009 g Cu(OAc)<sub>2</sub> and 0.0043 g of 1,4-bis(diphenylphosphino)butane (dppb). Then 0.50 mL of toluene and 0.0303 g of phenylsilane were sequentially added. Purification by MPLC (3:97 – 20:80 EtOAc:hexanes) afforded **4c** as a white solid (0.0217 g, 90%). The spectral data of **12c** matched that reported by Ma and co-workers:<sup>16</sup> mp = 105–106 °C; <sup>1</sup>H NMR (CDCl<sub>3</sub>, 500 MHz) δ 7.94 – 7.84 (m, 2H), 7.15 (d, *J* = 8.2 Hz, 2H), 7.11 – 7.02 (m, 2H), 6.96 – 6.86 (m, 2H), 6.01 (s, 1H), 3.87 (s, 3H), 2.34 (s, 3H); <sup>13</sup>C NMR (CDCl<sub>3</sub>, 125 MHz) δ 167.1 (C), 148.9 (C), 138.1 (C), 133.2 (C), 131.5 (CH), 130.1 (CH), 121.4 (CH), 120.5 (C), 114.0 (CH), 51.7 (CH<sub>3</sub>), 20.9 (CH<sub>3</sub>); IR (thin film): 3396, 1676, 1553, 1477, 1405, 1062, 771 cm<sup>-1</sup>.

14. Adeniji, A.O.; Twenter, B.M.; Byrns, M.C.; Jin, Y.; Chen, M.; Winkler, J.D.; Penning, T.M. *J. Med. Chem.* **2012**, *55*, 2311.

15. Li, G.; Yang, L.; Liu, J.-J.; Zhang, W.; Cao, R.; Wang, C.; Zhang, Z.; Xiao, J.; Xue, D. *Angew. Chem. Int. Ed.* **2021**, *60*, 5230.

16. Zhang, H.; Cai, Q.; Ma, D. *J. Org. Chem.* **2005**, *70*, 5164.

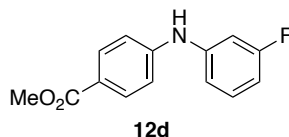

**Methyl 4-(3-fluorophenylamino)benzoate 12d.**<sup>17</sup> The optimized method was followed by adding 0.0181 g of methyl 4-nitrobenzoate, 0.0210 g of 3-fluorophenylboronic acid and 0.50 mL of MeCN solution of 0.0009 g Cu(OAc)<sub>2</sub> and 0.0043 g of 1,4-bis(diphenylphosphino)butane (dppb). Then 0.50 mL of toluene and 0.0303 g of phenylsilane were sequentially added. Purification by MPLC (3:97 – 20:80 EtOAc:hexanes) afforded **12d** as a white solid (0.0216 g, 88%). Diarylamine **12d** was previously reported by Griffioen *et al.*:<sup>14</sup> mp = 39–40 °C; <sup>1</sup>H NMR (CDCl<sub>3</sub>, 500 MHz) δ 8.00 – 7.90 (m, 2H), 7.30 – 7.26 (m, 1H), 7.05 – 6.99 (m, 2H), 6.93 – 6.84 (m, 2H), 6.73 (ddd, *J* = 10.1, 7.9, 2.7 Hz, 1H), 6.07 (s, 1H), 3.89 (s, 3H); <sup>13</sup>C NMR (CDCl<sub>3</sub>, 125 MHz) δ 166.8 (C), 163.6 (d, *J* = 245.5 Hz, C), 146.9 (C), 142.9 (d, *J* = 9.3 Hz, C), 131.5 (CH), 130.7 (d, *J* = 9.7 Hz, CH), 122.2 (C), 115.6 (CH), 115.0 (CH), 109.3 (d, *J* = 21.3 Hz, CH), 106.4 (d, *J* = 24.5 Hz, CH), 51.8 (CH<sub>3</sub>); IR (thin film): 3364, 3041, 2959, 2841, 1610, 1501, 1232, 837, 764 cm<sup>-1</sup>.

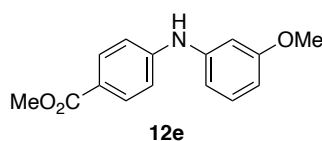

**Methyl 4-(3-methoxyphenylamino)benzoate 12e.**<sup>15</sup> The optimized method was followed by adding 0.0181 g of methyl 4-nitrobenzoate, 0.0228 g of 3-methoxyphenylboronic acid and 0.50 mL of MeCN solution of 0.0009 g Cu(OAc)<sub>2</sub> and 0.0043 g of 1,4-bis(diphenylphosphino)butane (dppb). Then 0.50 mL of toluene and 0.0303 g of phenylsilane were sequentially added. Purification by MPLC (3:97 – 20:80 EtOAc:hexanes) afforded **12e** as a pale yellow oil (0.0237 g, 92%). The spectral data of **12e** matched that reported by Winkler, Penning and co-workers.<sup>18</sup> <sup>1</sup>H NMR (CDCl<sub>3</sub>, 500 MHz) δ 7.92 (d, *J* = 8.8 Hz, 2H), 7.24 (t, *J* = 8.1 Hz, 1H), 7.01 (d, *J* = 8.8 Hz, 2H), 6.76 (d, *J* = 7.9 Hz, 1H), 6.73 (t, *J* = 2.2 Hz, 1H), 6.61 (dd, *J* = 8.2, 2.4 Hz, 1H), 6.14 (s, 1H), 3.88 (s, 3H), 3.79 (s, 3H); <sup>13</sup>C NMR (CDCl<sub>3</sub>, 125 MHz) δ 167.0 (C), 160.7 (C), 147.9 (C), 142.3 (C), 131.5 (CH), 130.3 (CH), 121.2 (C), 115.0 (CH), 112.6 (CH), 108.3 (CH), 106.0 (CH), 55.3 (CH<sub>3</sub>), 51.8 (CH<sub>3</sub>); IR (thin film): 3361, 2945, 2813, 1689, 1517, 1440, 1409, 1352, 1248, 789, 689 cm<sup>-1</sup>.

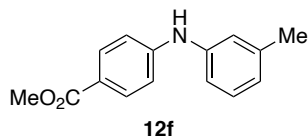

**Methyl 4-(3-tolylamino)benzoate 12f.**<sup>15</sup> The optimized method was followed by adding 0.0181 g of methyl 4-nitrobenzoate, 0.0204 g of 3-methylphenylboronic acid and 0.50 mL of MeCN solution of 0.0009 g Cu(OAc)<sub>2</sub> and 0.0043 g of 1,4-bis(diphenylphosphino)butane (dppb). Then 0.50 mL of toluene and 0.0303 g of phenylsilane were sequentially added. Purification by MPLC (3:97 – 20:80 EtOAc:hexanes) afforded **12f** as a yellow oil (0.0212 g, 88%). The spectral data of **12f** matched that reported by Winkler, Penning and co-workers:<sup>15</sup> <sup>1</sup>H NMR (CDCl<sub>3</sub>, 500 MHz) δ 7.91 (d, *J* = 8.8 Hz, 2H), 7.24 – 7.21 (m, 1H), 7.00 – 6.96 (m, 4H), 6.89 (d, *J* = 7.5 Hz, 1H), 6.00 (s, 1H), 3.87 (s, 3H), 2.35 (s, 3H); <sup>13</sup>C NMR (CDCl<sub>3</sub>, 125 MHz) δ 167.0 (C), 148.2 (C), 140.8 (C), 139.5 (C), 131.5 (CH), 129.4 (CH), 124.0 (CH), 121.2 (CH), 117.6 (CH), 114.6 (CH), 51.8 (CH<sub>3</sub>), 21.6 (CH<sub>3</sub>), only signals visible; IR (thin film): 3412, 1691, 1565, 1523, 1481, 1416, 1059, 794 cm<sup>-1</sup>.

17. Griffioen, G.; Van Dooren, T.; Rojas de la Parra, V.; Allasia, S.; Marchand, A.; Kilonda, A.; Chaltin, P. Preparation of indolyethylbenzamide derivatives as inhibitors of TAU for the treatment of neurodegenerative diseases. WO2012080221 A1, 06/21/2012.

18. Adeniji, A.O.; Twenter, B.M.; Byrns, M.C.; Jin, Y.; Chen, M.; Winkler, J.D.; Penning, T.M. *J. Med. Chem.* **2012**, *55*, 2311.

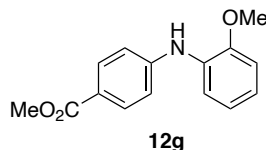

**Methyl 4-((2-methoxyphenyl)amino)benzoate 12g.**<sup>16</sup> The optimized method was followed by adding 0.0181 g of methyl 4-nitrobenzoate, 0.0228 g of 2-methoxyphenylboronic acid and 0.50 mL of MeCN solution of 0.0009 g Cu(OAc)<sub>2</sub> and 0.0043 g of 1,4-bis(diphenylphosphino)butane (dppb). Then 0.50 mL of toluene and 0.0303 g of phenylsilane were sequentially added. Purification by MPLC (3:97 – 20:80 EtOAc:hexanes) afforded **12g** as a light yellow oil (0.0219 g, 85%). The spectral data of **12g** matched that reported by Organ and co-workers:<sup>19</sup> <sup>1</sup>H NMR (CDCl<sub>3</sub>, 500 MHz) δ 7.96 – 7.90 (m, 2H), 7.40 (dd, *J* = 7.6, 1.8 Hz, 1H), 7.10 – 7.05 (m, 2H), 7.02 – 6.90 (m, 3H), 6.37 (s, 1H), 3.89 (s, 3H), 3.88 (s, 3H); <sup>13</sup>C NMR (CDCl<sub>3</sub>, 125 MHz) δ 167.0 (C), 149.5 (C), 147.6 (C), 131.4 (CH), 130.5 (C), 122.2 (CH), 121.2 (C), 120.8 (CH), 117.7 (CH), 115.2 (CH), 110.9 (CH), 55.6 (CH<sub>3</sub>), 51.7 (CH<sub>3</sub>); IR (thin film): cm<sup>-1</sup>. 3324, 2950, 1682, 1447, 1398, 1084, 844 cm<sup>-1</sup>

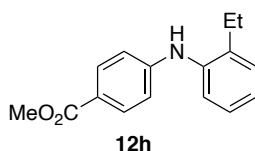

**Methyl 4-((2-ethylphenyl)amino)benzoate 12h.** The optimized method was followed by adding 0.0181 g of methyl 4-nitrobenzoate, 0.0228 g of 2-ethylphenylboronic acid and 0.50 mL of MeCN solution of 0.0009 g Cu(OAc)<sub>2</sub> and 0.0043 g of 1,4-bis(diphenylphosphino)butane (dppb). Then 0.50 mL of toluene and 0.0303 g of phenylsilane were sequentially added. Visualization of the reaction progress using thin layer chromatography revealed that no reaction had occurred. The only visible species were methyl 4-nitrobenzoate and 2-ethylphenylboronic acid. The cross-coupling product was not observed.

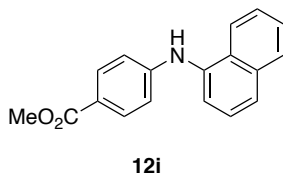

**Methyl 4-((naphthalen-1-yl)amino)benzoate 12i.**<sup>17</sup> The optimized method was followed by adding 0.0181 g of methyl 4-nitrobenzoate, 0.0258 g of 1-naphthylboronic acid and 0.50 mL of MeCN solution of 0.0009 g Cu(OAc)<sub>2</sub> and 0.0043 g of 1,4-bis(diphenylphosphino)butane (dppb). Then 0.50 mL of toluene and 0.0303 g of phenylsilane were sequentially added. Purification by MPLC (3:97 – 20:80 EtOAc:hexanes) afforded **12i** as a yellow oil (0.0230 g, 83%). The spectral data of **12i** matched that reported by Deng, Huang and co-workers:<sup>17</sup> <sup>1</sup>H NMR (CDCl<sub>3</sub>, 500 MHz) δ 7.98 (d, *J* = 5.0 Hz, 2H), 7.90 (d, *J* = 5.0 Hz, 3H), 7.72 (s, 1H), 7.58 – 7.46 (m, 4H), 6.84 (d, *J* = 5.0 Hz, 1H), 6.22 (s, 1H), 3.87 (s, 3H); <sup>13</sup>C NMR (CDCl<sub>3</sub>, 125 MHz) δ 167.0 (C), 147.9 (C), 138.5 (C), 134.3 (C), 131.6 (CH), 130.1 (C), 129.4 (CH), 127.7 (CH), 126.9 (CH), 126.7 (CH), 124.6 (CH), 121.5 (C), 121.3 (CH), 115.6 (CH), 115.0 (CH), 51.8 (CH<sub>3</sub>); IR (thin film): 3467, 3385, 3042, 2933, 1677, 1623, 1586, 1496, 1464, 1330, 1180, 857, 738 cm<sup>-1</sup>.

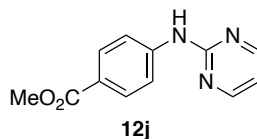

**Methyl 4-((pyrimidine-2-yl)amino)benzoate 12j.**<sup>17</sup> The optimized method was followed by adding 0.0362 g of methyl 4-nitrobenzoate, 0.0372 g of pyrimidin-2-yl-boronic acid and 1.00 mL of MeCN solution of 0.0018 g Cu(OAc)<sub>2</sub> and 0.0086



g of 1,4-bis(diphenylphosphino)butane (dppb). Then 1.00 mL of toluene and 0.0606 g of phenylsilane were sequentially added. Purification by MPLC (20:80 – 50:50 EtOAc:hexanes) afforded **12j** as a yellow solid (0.0270 g, 59%). The spectral data of **12j** matched that reported by Deng, Huang and co-workers:<sup>17</sup> mp = 149–150 °C; <sup>1</sup>H NMR (CDCl<sub>3</sub>, 500 MHz) δ 8.37 (d, J = 4.8 Hz, 2H), 7.78 (s, 1H), 7.48 (d, J = 8.8 Hz, 2H), 6.90 (d, J = 8.8 Hz, 2H), 6.64 (t, J = 4.8 Hz, 1H), 3.80 (s, 3H); <sup>13</sup>C NMR (CDCl<sub>3</sub>, 125 MHz) δ 160.8 (C), 158.1 (CH), 155.8 (CH), 132.4 (C), 122.4 (C), 114.3 (CH), 111.9 (CH), 55.6 (CH<sub>3</sub>); IR (thin film): 3345, 2960, 2830, 1679, 1650, 1525, 1263, 764 cm<sup>-1</sup>.

### III. Mechanistic Experiments

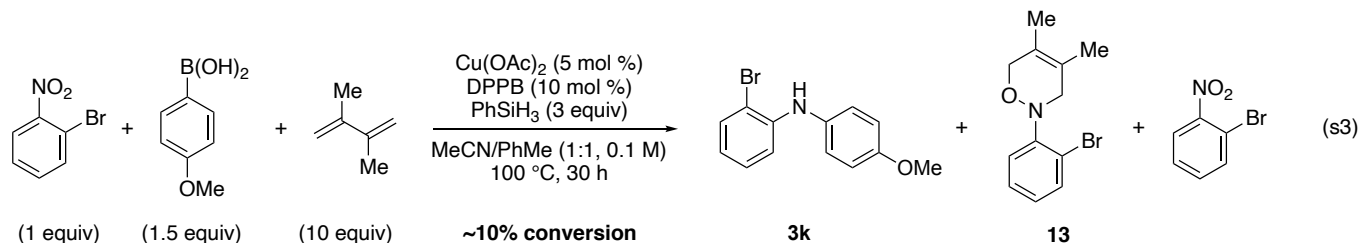

A 10 mL Schlenk tube was charged with 0.0606 g of 2-bromonitrobenzene and 0.0684 g of 4-methoxyphenylboronic acid under nitrogen. To this mixture was added a solution of 0.0027 g of Cu(OAc)<sub>2</sub> and 0.0129 g of 1,4-bis(diphenylphosphino)butane (dppb) in 1.5 mL of MeCN was then added. The mixture was diluted with 0.5 mL of toluene, and 0.0909 g of phenyl silane and 0.33 mL of 2,3-dimethyl-1,3-butadiene were sequentially added. The resulting reaction mixture was heated to 100 °C. After 30 hours, the mixture was cooled to room temperature and filtered through a pad of silica gel. The filtrate was concentrated *in vacuo* and was purified by MPLC (hexanes) to remove the phenyl silane oligomeric by-product and the aryl boronic acid to obtain a 90:7:3 mixture of 2-bromonitrobenzene, diarylamine **3k** and oxazine **13**. Oxazine **13** was previously reported by Shigeki.<sup>20</sup> Visible peaks for oxazine **13**: <sup>1</sup>H NMR (CDCl<sub>3</sub>, 500 MHz) δ 4.38 (s, 2H), 3.61 (s, 2H), 1.25 (s, 3H).

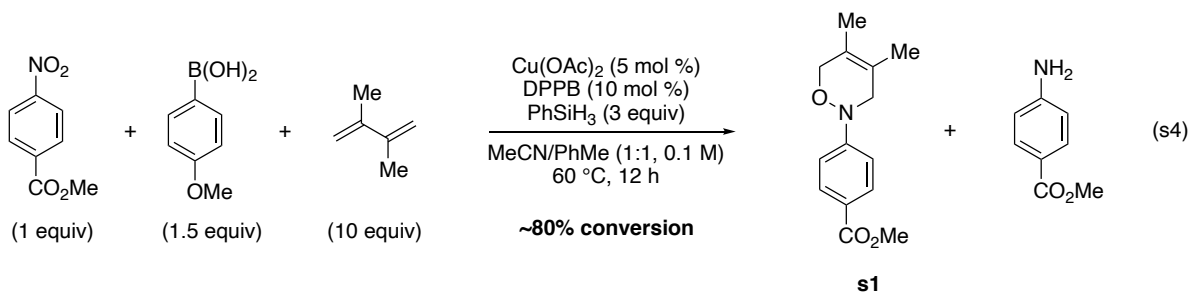

A 10 mL Schlenk tube was charged with 0.0181 g of methyl 4-nitrobenzoate and 0.0228 g of 4-methoxyphenylboronic acid under nitrogen. To this mixture was added a solution of 0.0009 g of Cu(OAc)<sub>2</sub> and 0.0043 g of 1,4-bis(diphenylphosphino)butane (dppb) in 0.5 mL of MeCN was then added. The mixture was diluted with 0.5 mL of toluene, and 0.0303 g of phenyl silane and 0.11 mL of 2,3-dimethyl-1,3-butadiene were sequentially added. The resulting reaction mixture was heated to 60 °C. After 12 hours, the mixture was cooled to room temperature and filtered through a pad of silica gel. The filtrate was concentrated *in vacuo*, and analysis of the residue using <sup>1</sup>H NMR spectroscopy with CH<sub>2</sub>Br<sub>2</sub> as the internal standard revealed that the reaction had gone to ~80% conversion. The coupling product was not observed, but aniline and oxazine **s1** were both present. Several peaks were also observed in the <sup>1</sup>H NMR spectrum in between 3.6 and 4.0 ppm. Oxazine **s1** was previously reported by Ragaini and co-workers.<sup>21</sup> While we were not able to purify the oxazine

20. Shigeki, K. *J. Chem. Soc. Jpn.* **1956**, 59, 951.

21. El-Atawy, M. A.; Formenti, D.; Ferretti, F.; Ragaini, F. *ChemCatChem* **2018**, 10, 4707.

from the reaction mixture, its peaks at 4.35 and 3.76 ppm matched that in the 2018 Ragaini *ChemCatChem* paper. Visible peaks for oxazine **1**:  $^1\text{H}$  NMR ( $\text{CDCl}_3$ , 500 MHz)  $\delta$  4.35 (s, 2H), 3.76 (s, 2H).

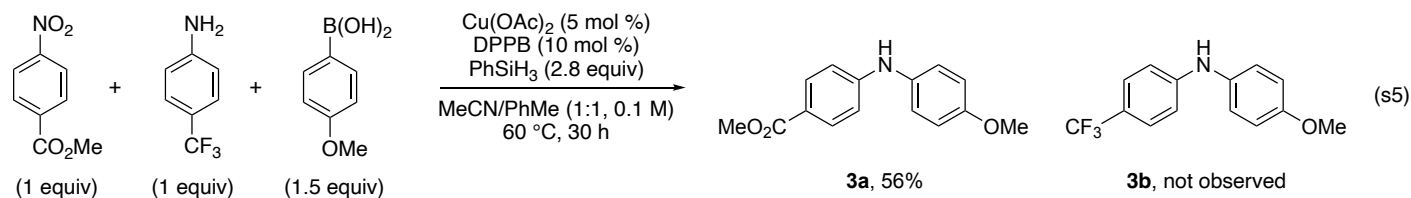

A 10 mL Schlenk was charged with 0.0090 g of methyl 4-nitrobenzoate, 0.0081 g of 4-trifluoromethylaniline and 0.0228 g of 4-methoxyphenylboronic acid. To this mixture was added 0.0009 g  $\text{Cu}(\text{OAc})_2$  and 0.0043 g of 1,4-bis(diphenylphosphino)butane (dppb) in 0.5 mL of MeCN. The mixture was diluted with 0.5 mL of toluene, and 0.0303 g of phenyl silane was added. The reaction mixture was heated to 60 °C. After 30 hours, the mixture was cooled to room temperature and filtered through a pad of silica gel. The filtrate was concentrated *in vacuo*, and analysis of the residue using  $^1\text{H}$  NMR spectroscopy with  $\text{CH}_2\text{Br}_2$  as the internal standard revealed formation of diarylamine **3a** as the only product.

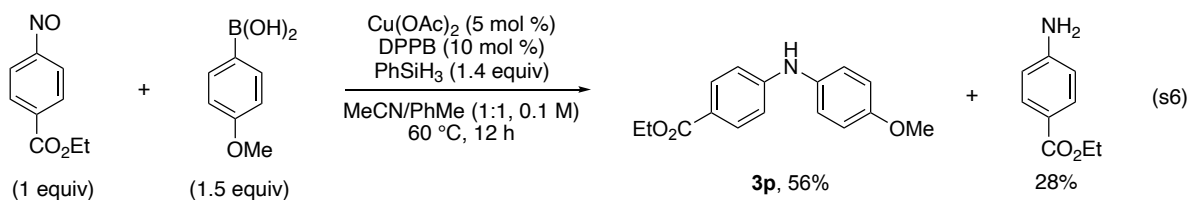

A 10 mL Schlenk tube was charged with 0.0179 g of ethyl 4-nitrosobenzoate and 0.0228 g of 4-methoxyphenylboronic acid under nitrogen. To this mixture was added a solution of 0.0009 g  $\text{Cu}(\text{OAc})_2$  and 0.0043 g of 1,4-bis(diphenylphosphino)butane (dppb) in 0.5 mL of MeCN. The mixture was diluted with 0.5 mL of toluene and 0.0151 g of phenyl silane was added. The resulting reaction mixture was heated to 60 °C. After 12 hours, the reaction mixture was cooled to room temperature and filtered through a pad of silica gel. The filtrate was concentrated *in vacuo*, and analysis of the residue using  $^1\text{H}$  NMR spectroscopy with  $\text{CH}_2\text{Br}_2$  as the internal standard revealed the formation of the diarylamine **3p** in 56% and ethyl 4-aminobenzoate in 28%.

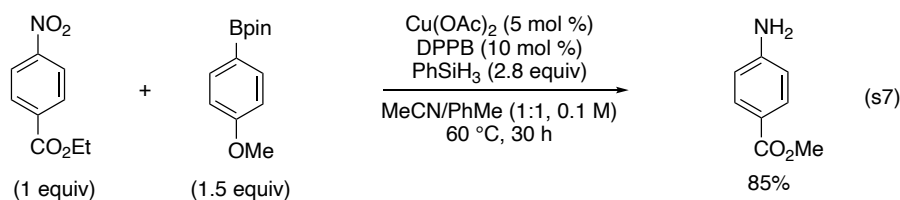

A 10 mL Schlenk tube was charged with 0.0181 g of methyl 4-nitrobenzoate and 0.0351 g of 4-methoxyphenylboronic acid pinacolate ester under nitrogen. To this mixture was added 0.0009 g  $\text{Cu}(\text{OAc})_2$  and 0.0043 g of 1,4-bis(diphenylphosphino)butane (dppb) in 0.5 mL of MeCN. The mixture was diluted with 0.5 mL of toluene and 0.0303 g of phenyl silane was added. The reaction mixture was heated to 60 °C. After 30 hours, the reaction mixture was cooled to room temperature and filtered through a pad of silica gel. The filtrate was concentrated *in vacuo*, and analysis of the residue using  $^1\text{H}$  NMR spectroscopy with  $\text{CH}_2\text{Br}_2$  as the internal standard revealed formation of methyl 4-aminobenzoate as the only product.

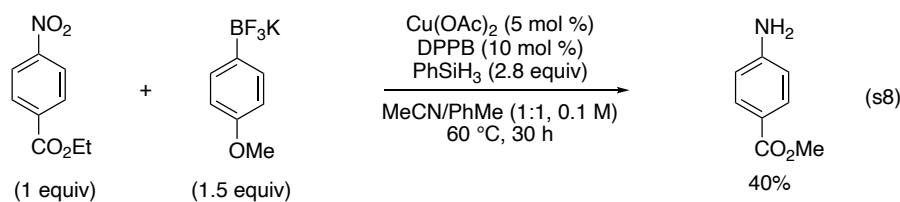

A 10 mL Schlenk tube was charged with 0.0181 g of methyl 4-nitrobenzoate and 0.0321 g of potassium 4-methoxyphenyltrifluoroborate under nitrogen. To this mixture was added 0.0009 g  $\text{Cu(OAc)}_2$  and 0.0043 g of 1,4-bis(diphenylphosphino)butane (dppb) in 0.5 mL of MeCN. The mixture was diluted with 0.5 mL of toluene, and 0.0303 g of phenyl silane was added. The reaction mixture was heated to 60 °C. After 30 hours, the reaction mixture was cooled to room temperature and filtered through a pad of silica gel. The filtrate was concentrated *in vacuo*, and analysis of the residue using  $^1\text{H}$  NMR spectroscopy with  $\text{CH}_2\text{Br}_2$  as the internal standard revealed formation of methyl 4-aminobenzoate as the only product.

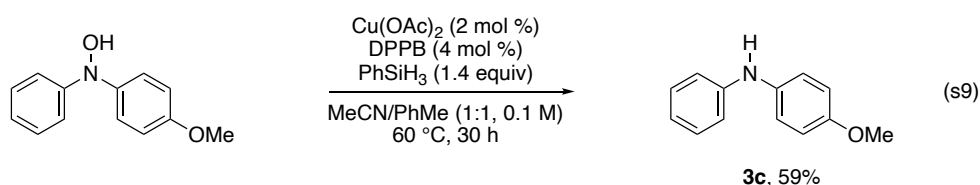

To a 10 mL reaction tube under nitrogen, 0.0287 g of *N*-(4-methoxyphenyl)-*N*-phenylhydroxylamine and 0.5 mL of a solution of 0.0003 g  $\text{Cu(OAc)}_2$  and 0.0016 g 1,4-bis(diphenylphosphino)butane in MeCN were added. The resulting mixture was diluted with 0.50 mL of toluene, and 0.0151 g of phenylsilane was added in one portion. The reaction tube was sealed and heated to 60 °C. After 12 h, the mixture was cooled to room temperature and filtered through a pad of silica gel. The filtrate was concentrated *in vacuo*. Analysis of the resulting residue using  $^1\text{H}$  NMR spectroscopy in  $\text{CDCl}_3$  using  $\text{CH}_2\text{Br}_2$  as the internal standard showed that diarylamine **3c** was formed in 59%. Repeating the reaction in the absence of  $\text{Cu(OAc)}_2$  resulted in no reaction.

#### IV. Spectral Data

- A. Spectral data for diarylamines **3**.....s-17
- B. Spectral data for diarylamines **12**.....s-45
- C. Spectral data for mechanistic experiments.....s-63

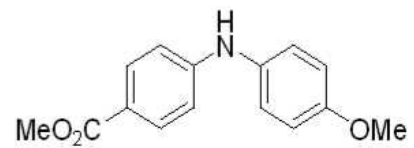

**3a**

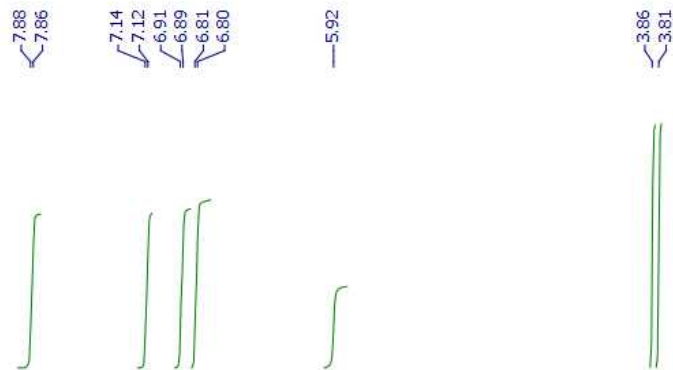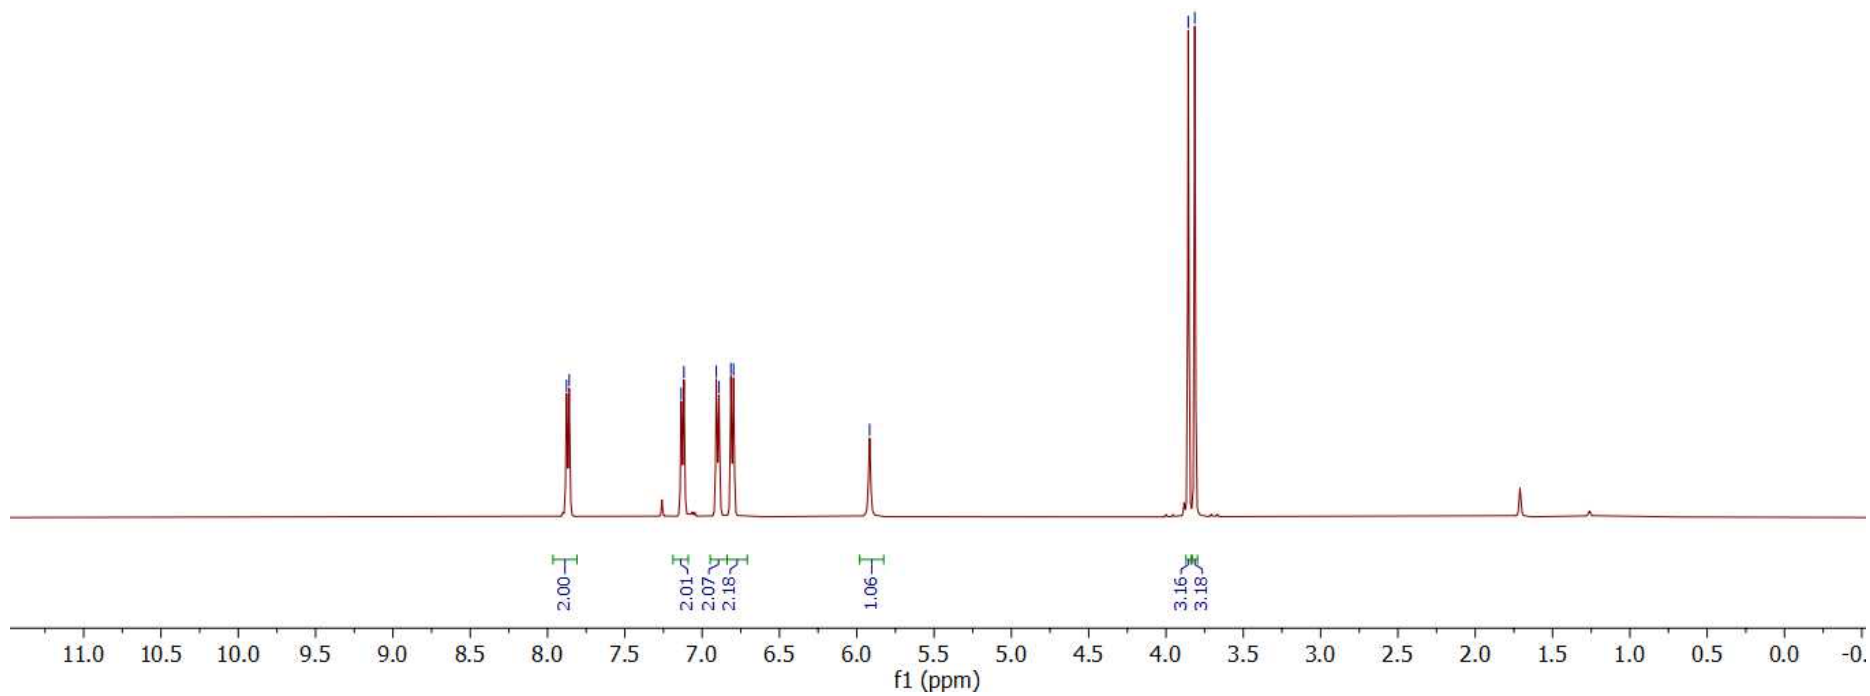

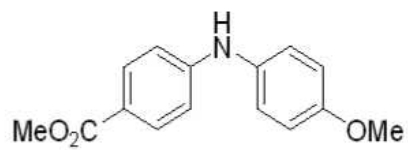

**3a**

—167.10

—156.59

—149.83

—133.42

—131.54

—124.47

—120.07

—114.80

—113.24

—55.56

—51.64

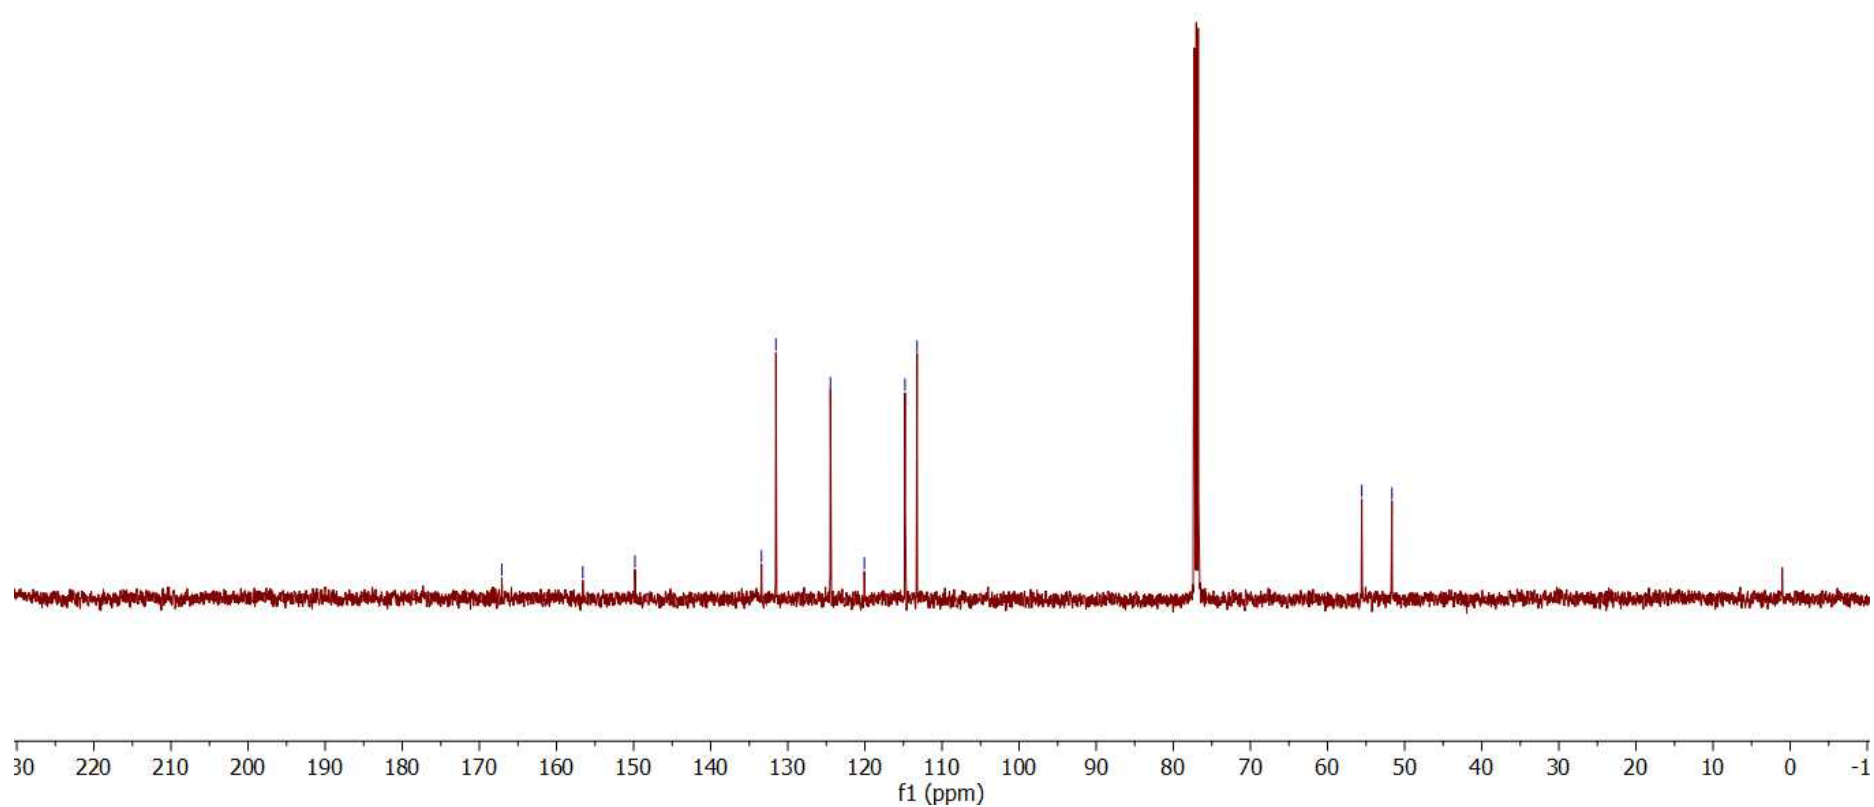

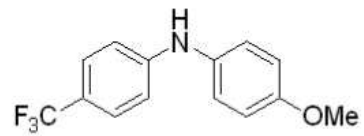

**3b**

7.42  
7.41  
7.13  
7.11  
6.91  
6.90  
6.86  
6.85

5.72

3.82

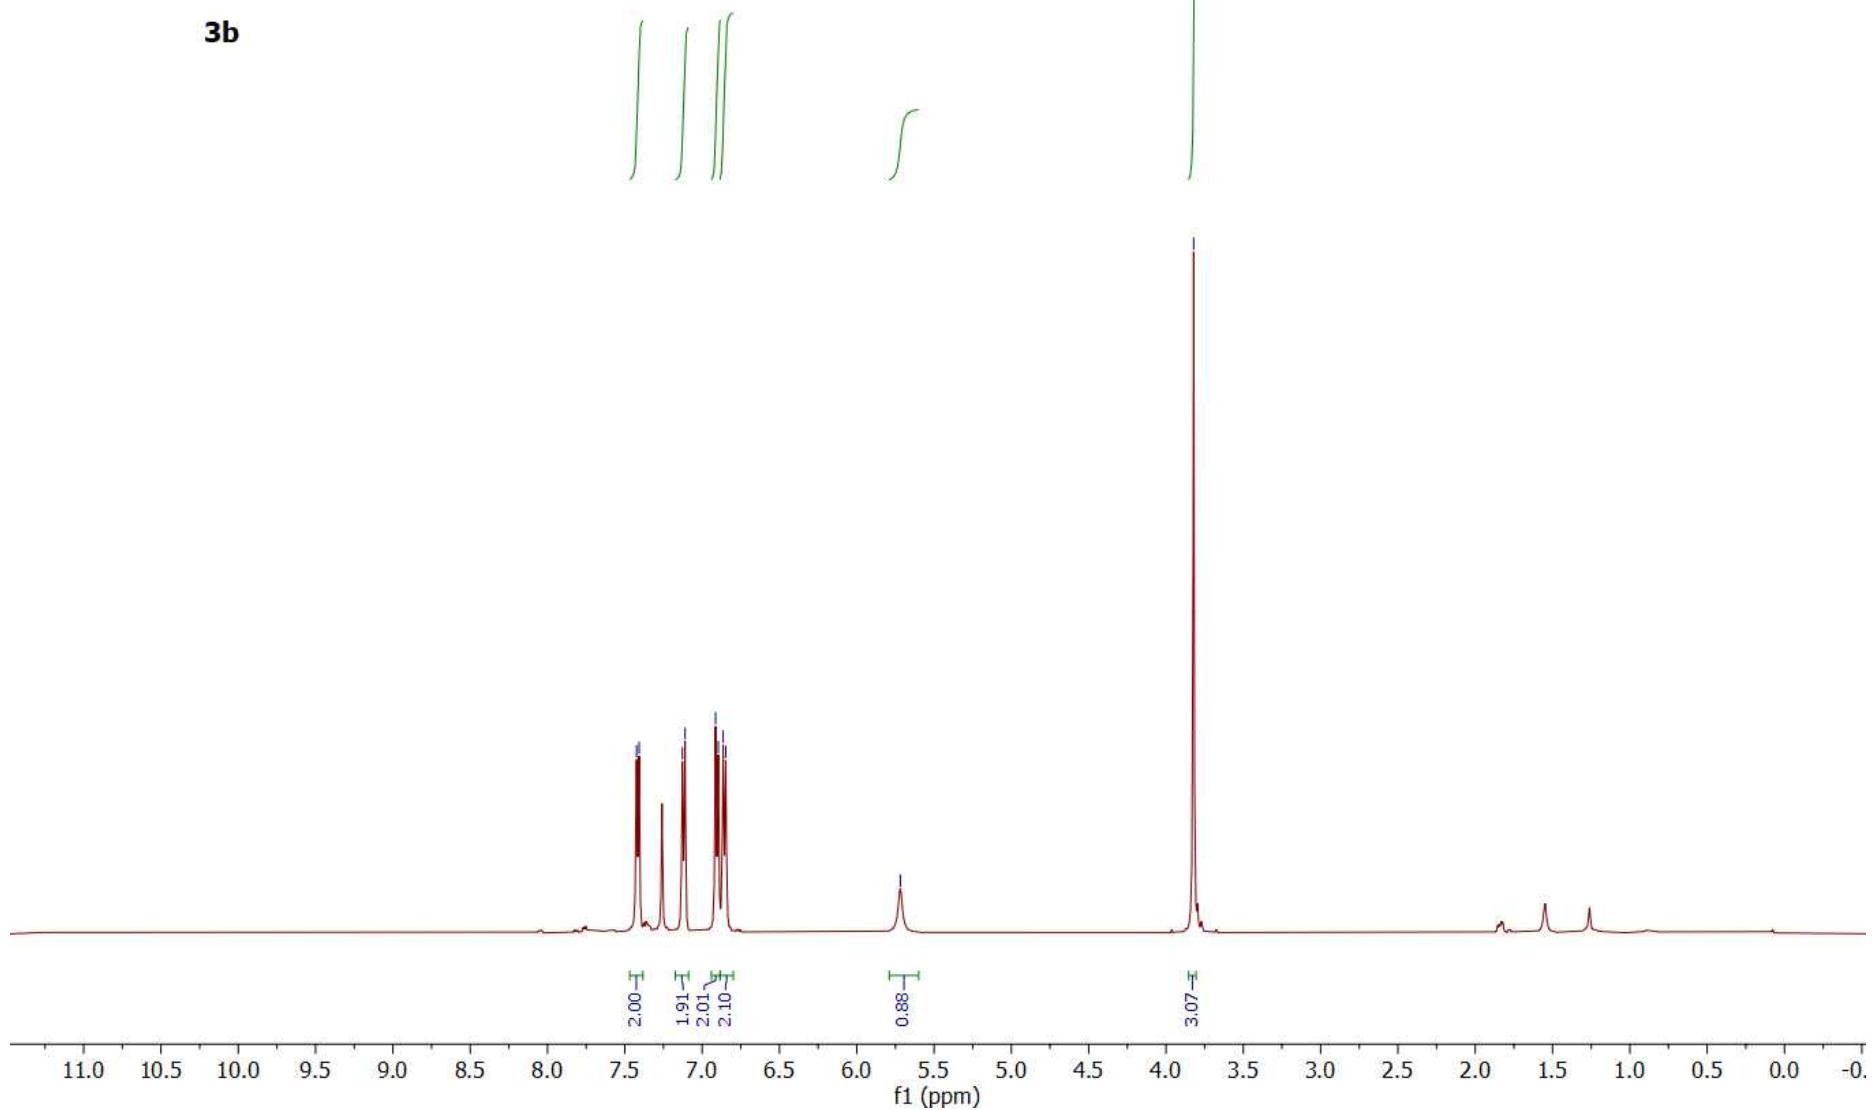

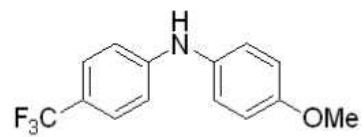

3c

156.52  
148.61  
141.81  
133.69  
126.69  
126.66  
124.31  
120.62  
114.83  
113.76  
113.05  
96.38  
55.56

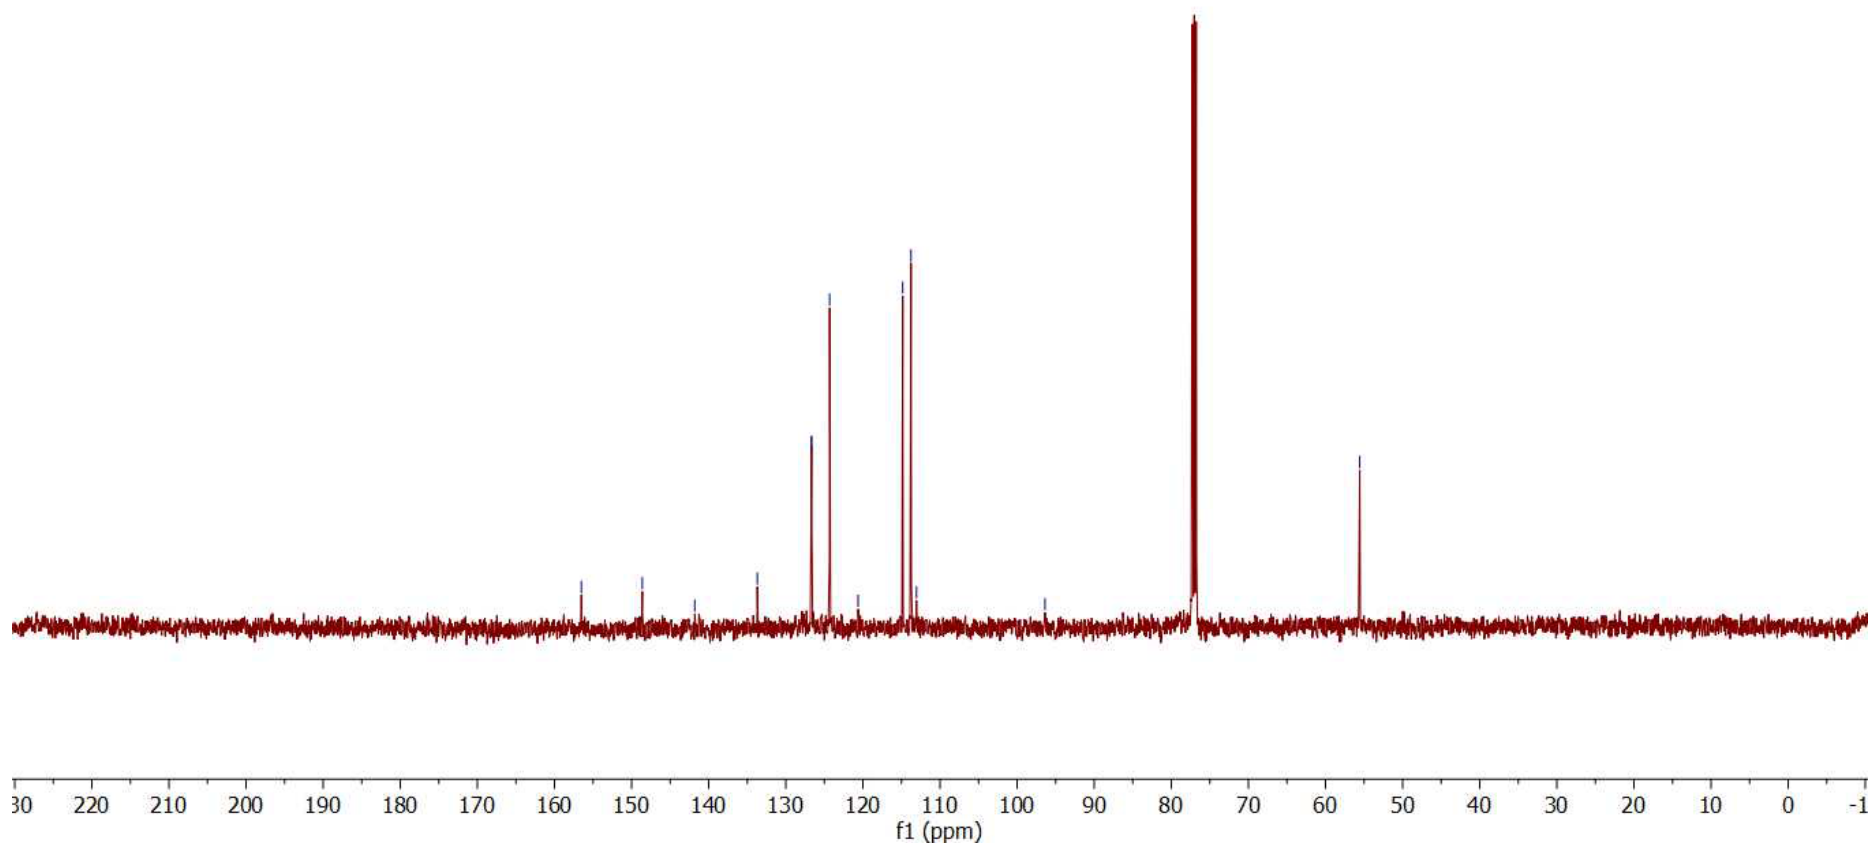



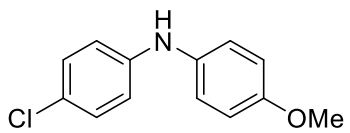

3c

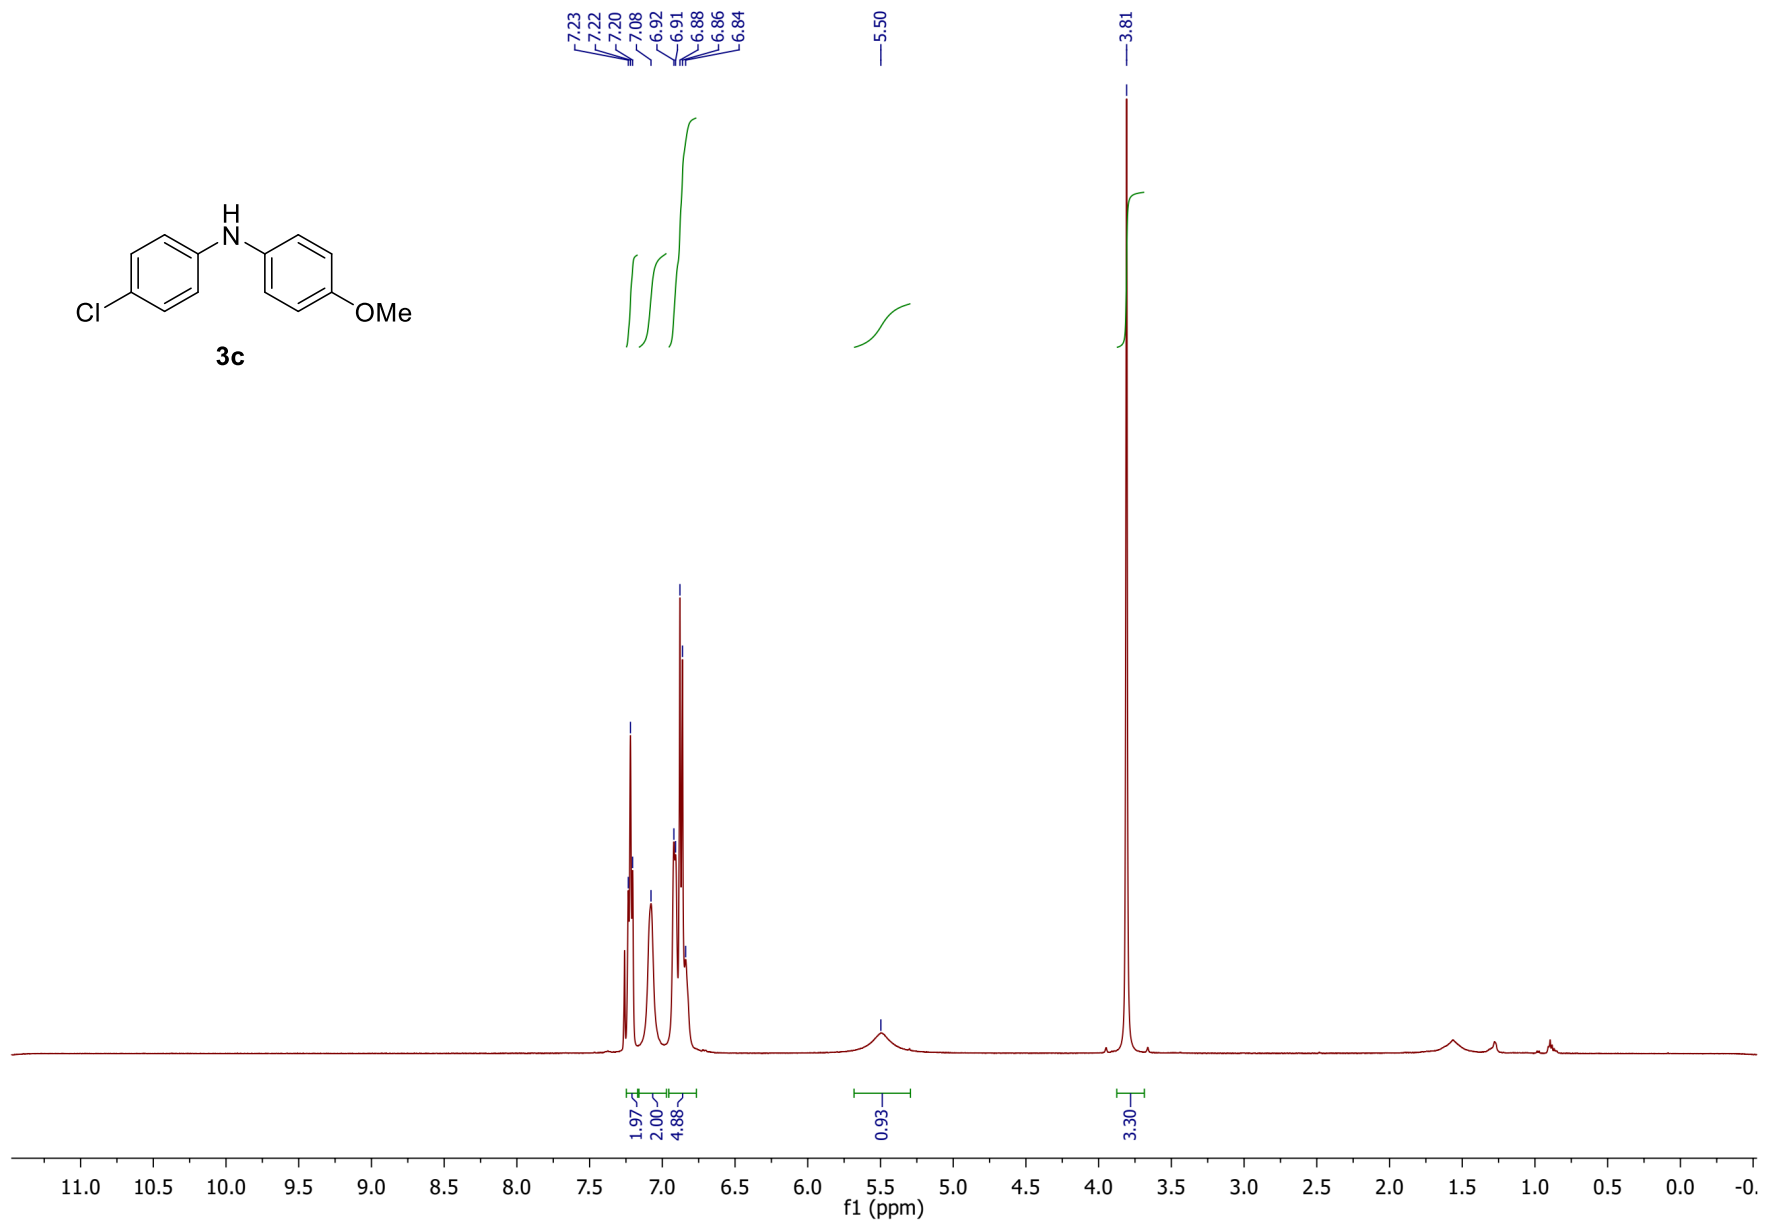

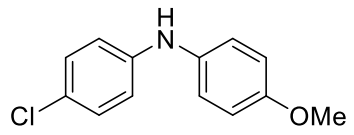

**3c**

—155.62  
—144.01  
—135.24  
—129.19  
—123.99  
—122.60  
—116.66  
—114.78

—55.60

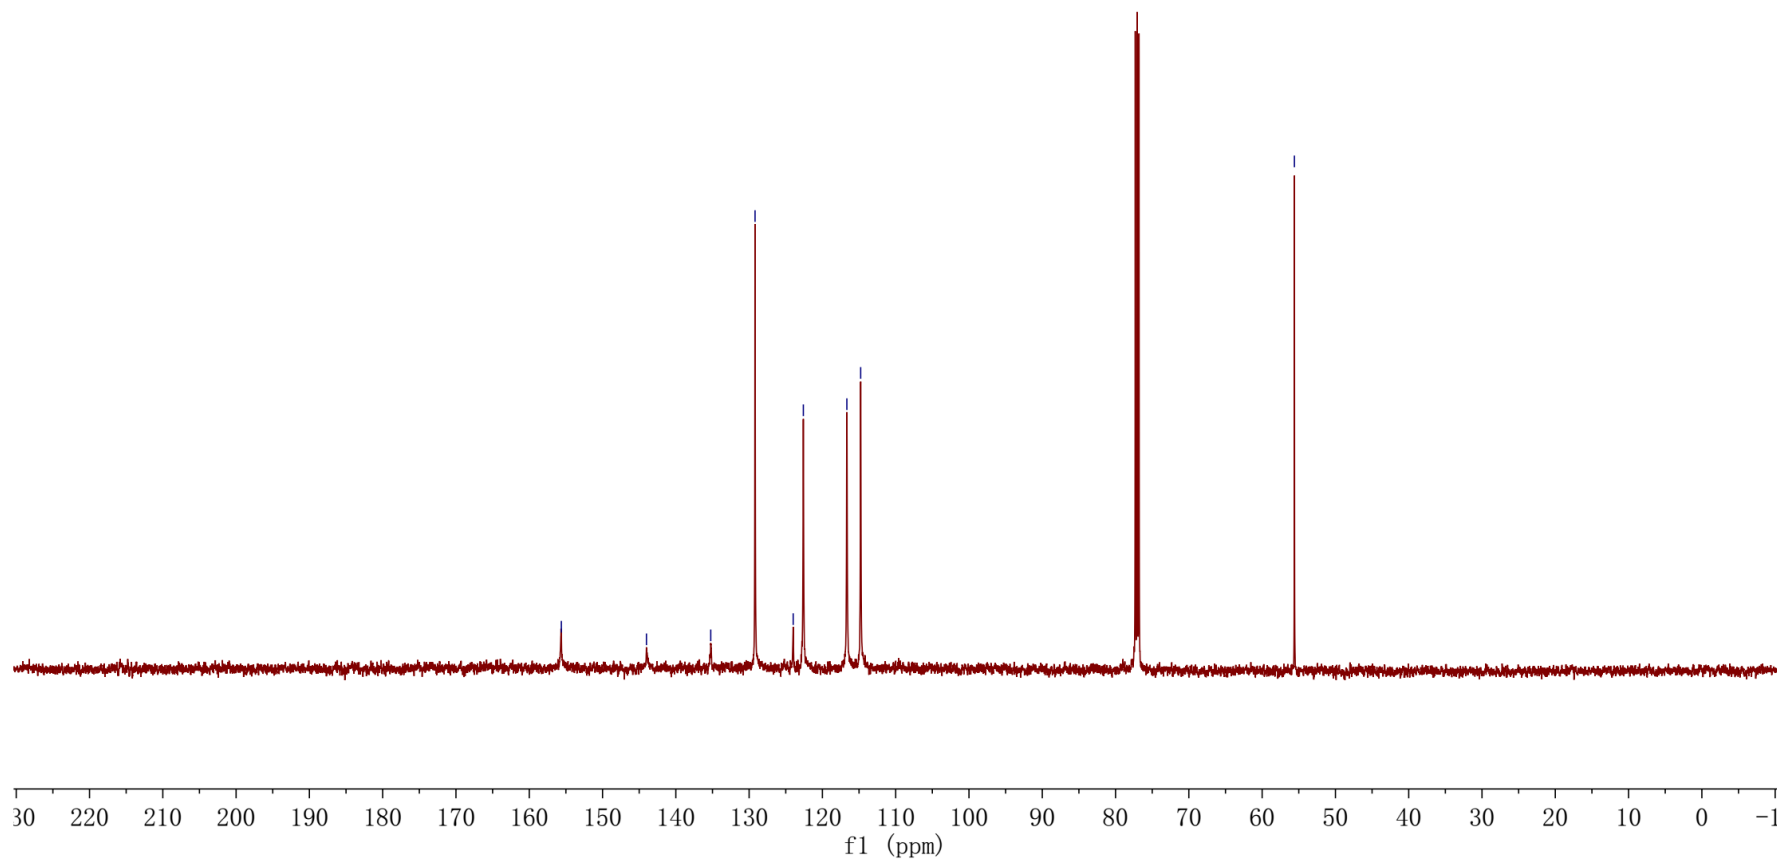

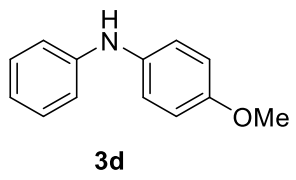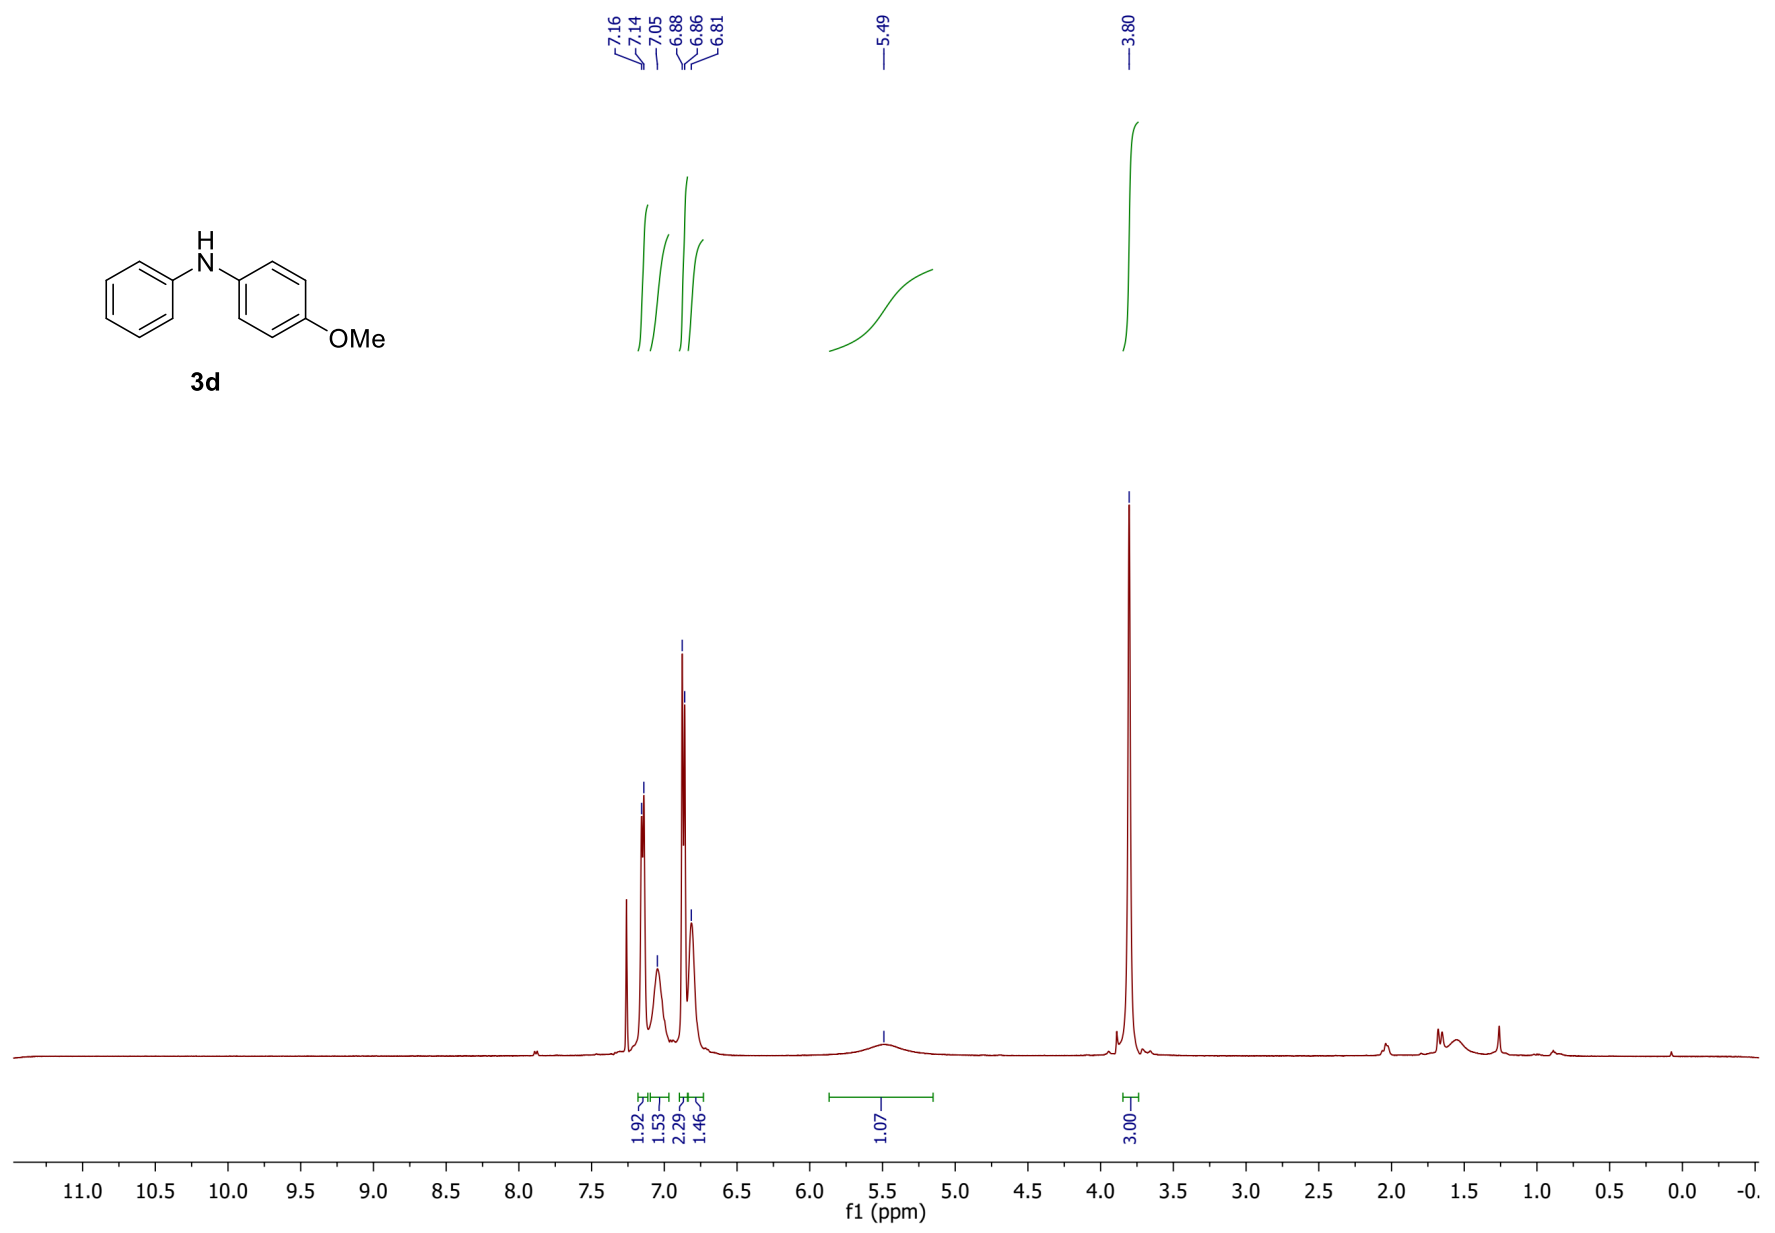

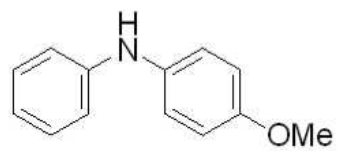

**3d**

— 155.31  
— 145.19  
— 129.32  
— 122.23  
— 119.58  
— 115.66  
— 114.69  
— 55.60

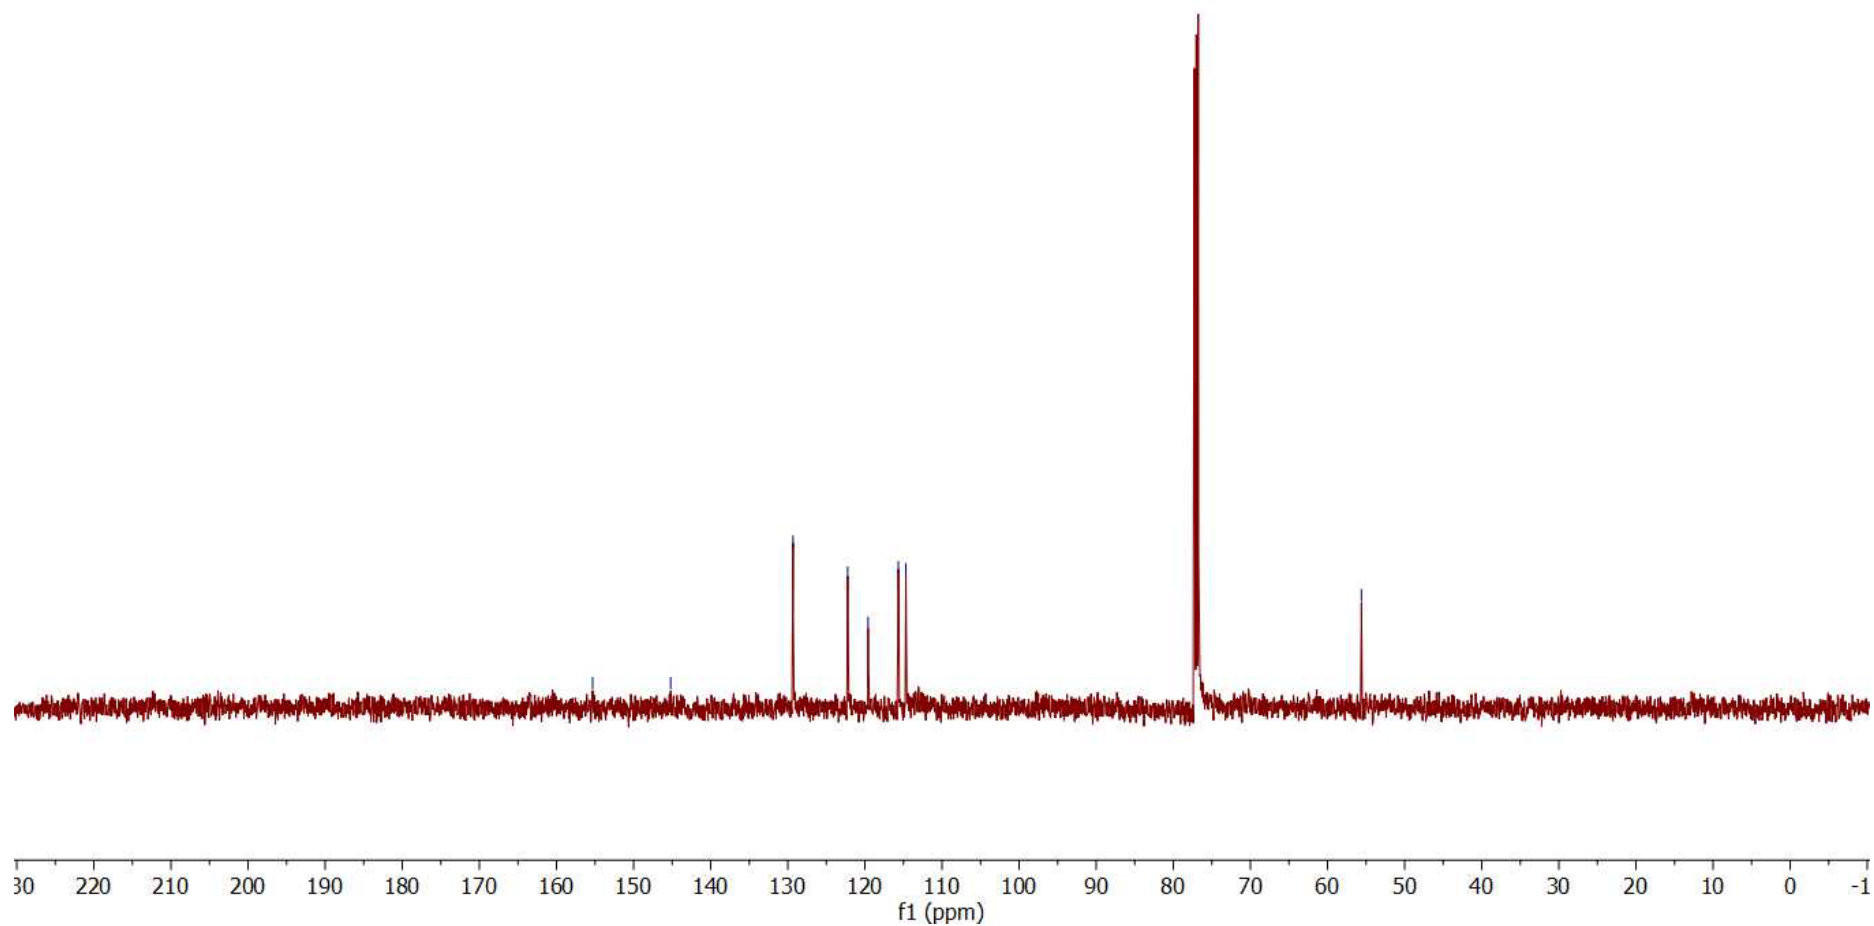

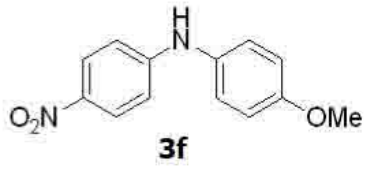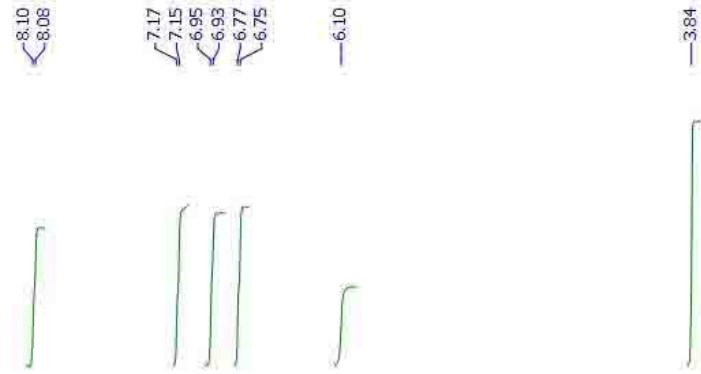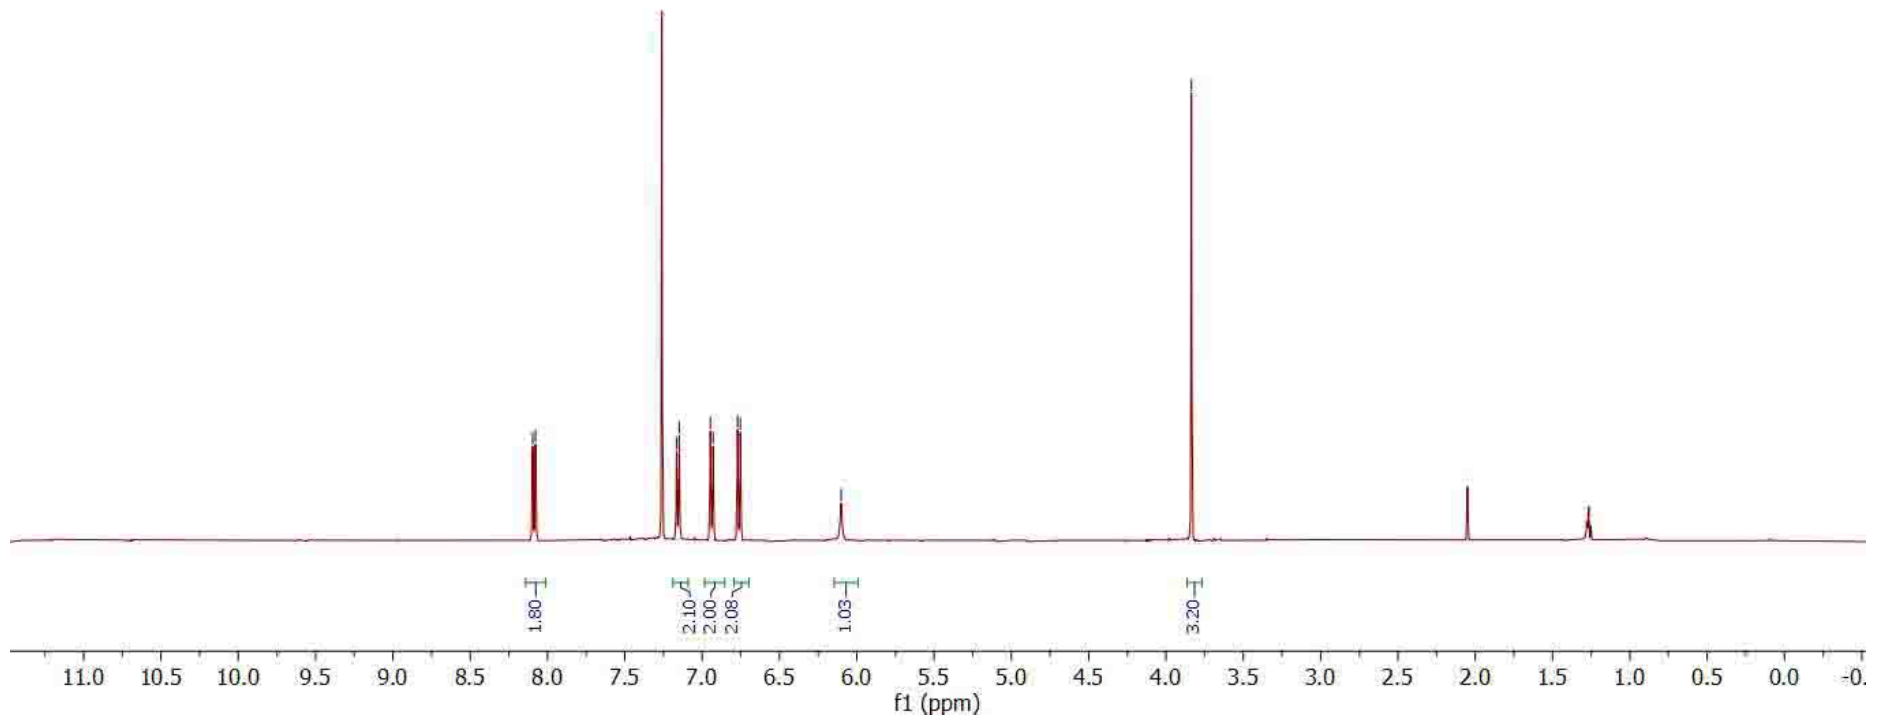

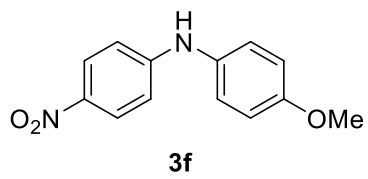

— 157.46  
— 151.75  
— 139.08  
— 132.00  
— 126.35  
— 125.52  
— 114.98  
— 112.64  
— 55.57

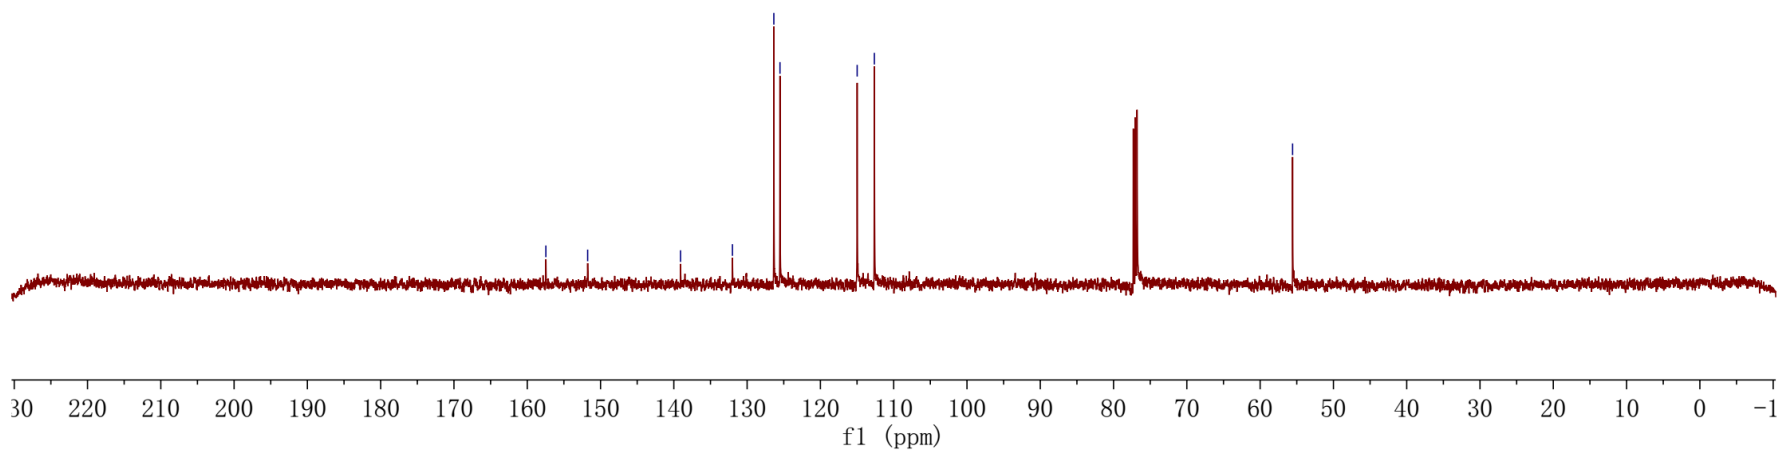

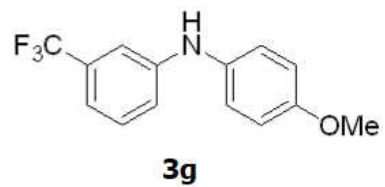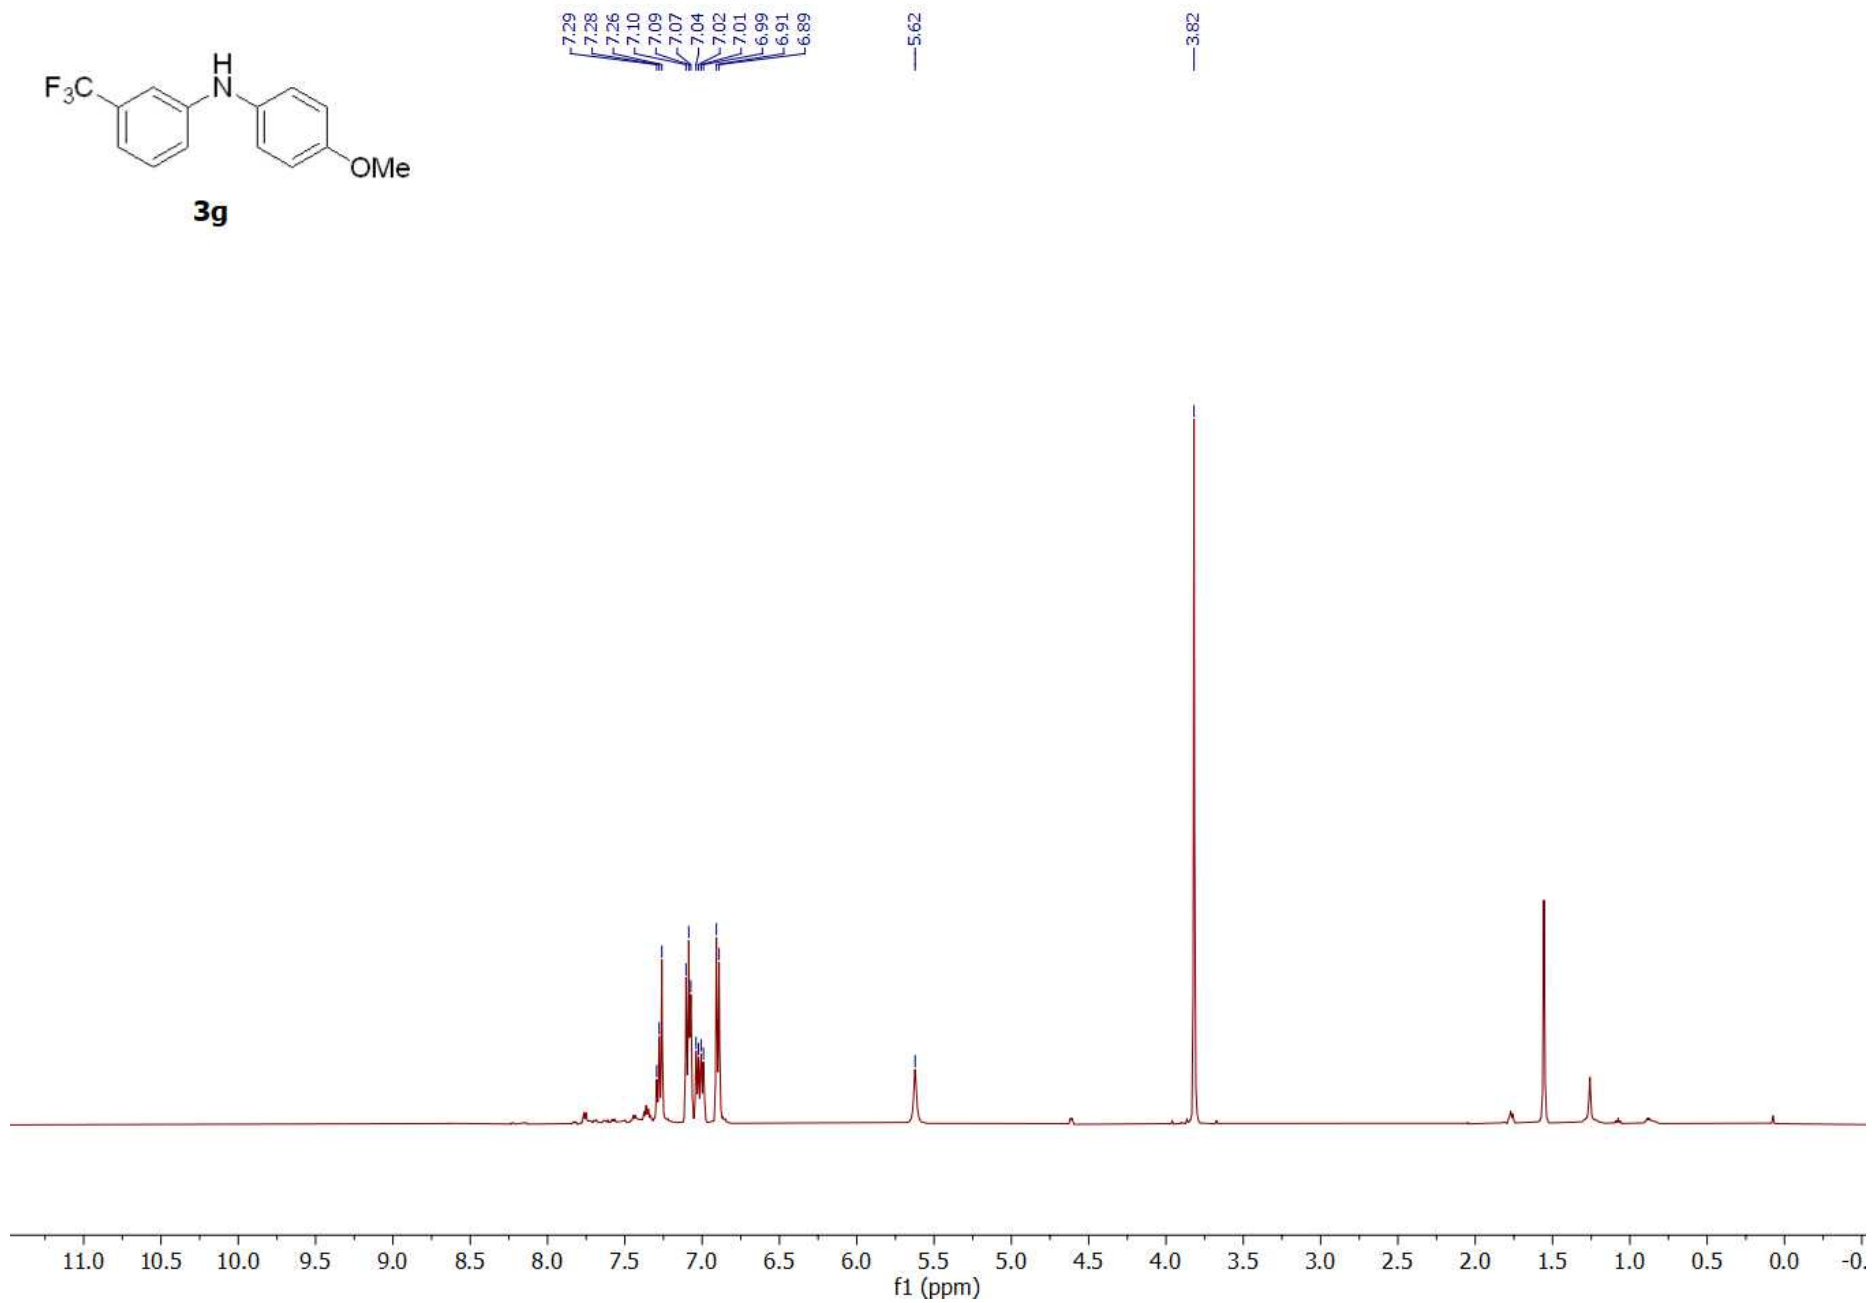

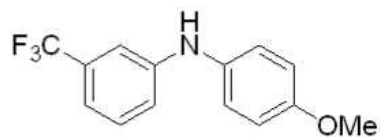

**3g**

156.20  
146.05  
134.28  
130.80  
129.75  
127.89  
123.54  
117.86  
115.59  
114.89  
111.27  
55.57

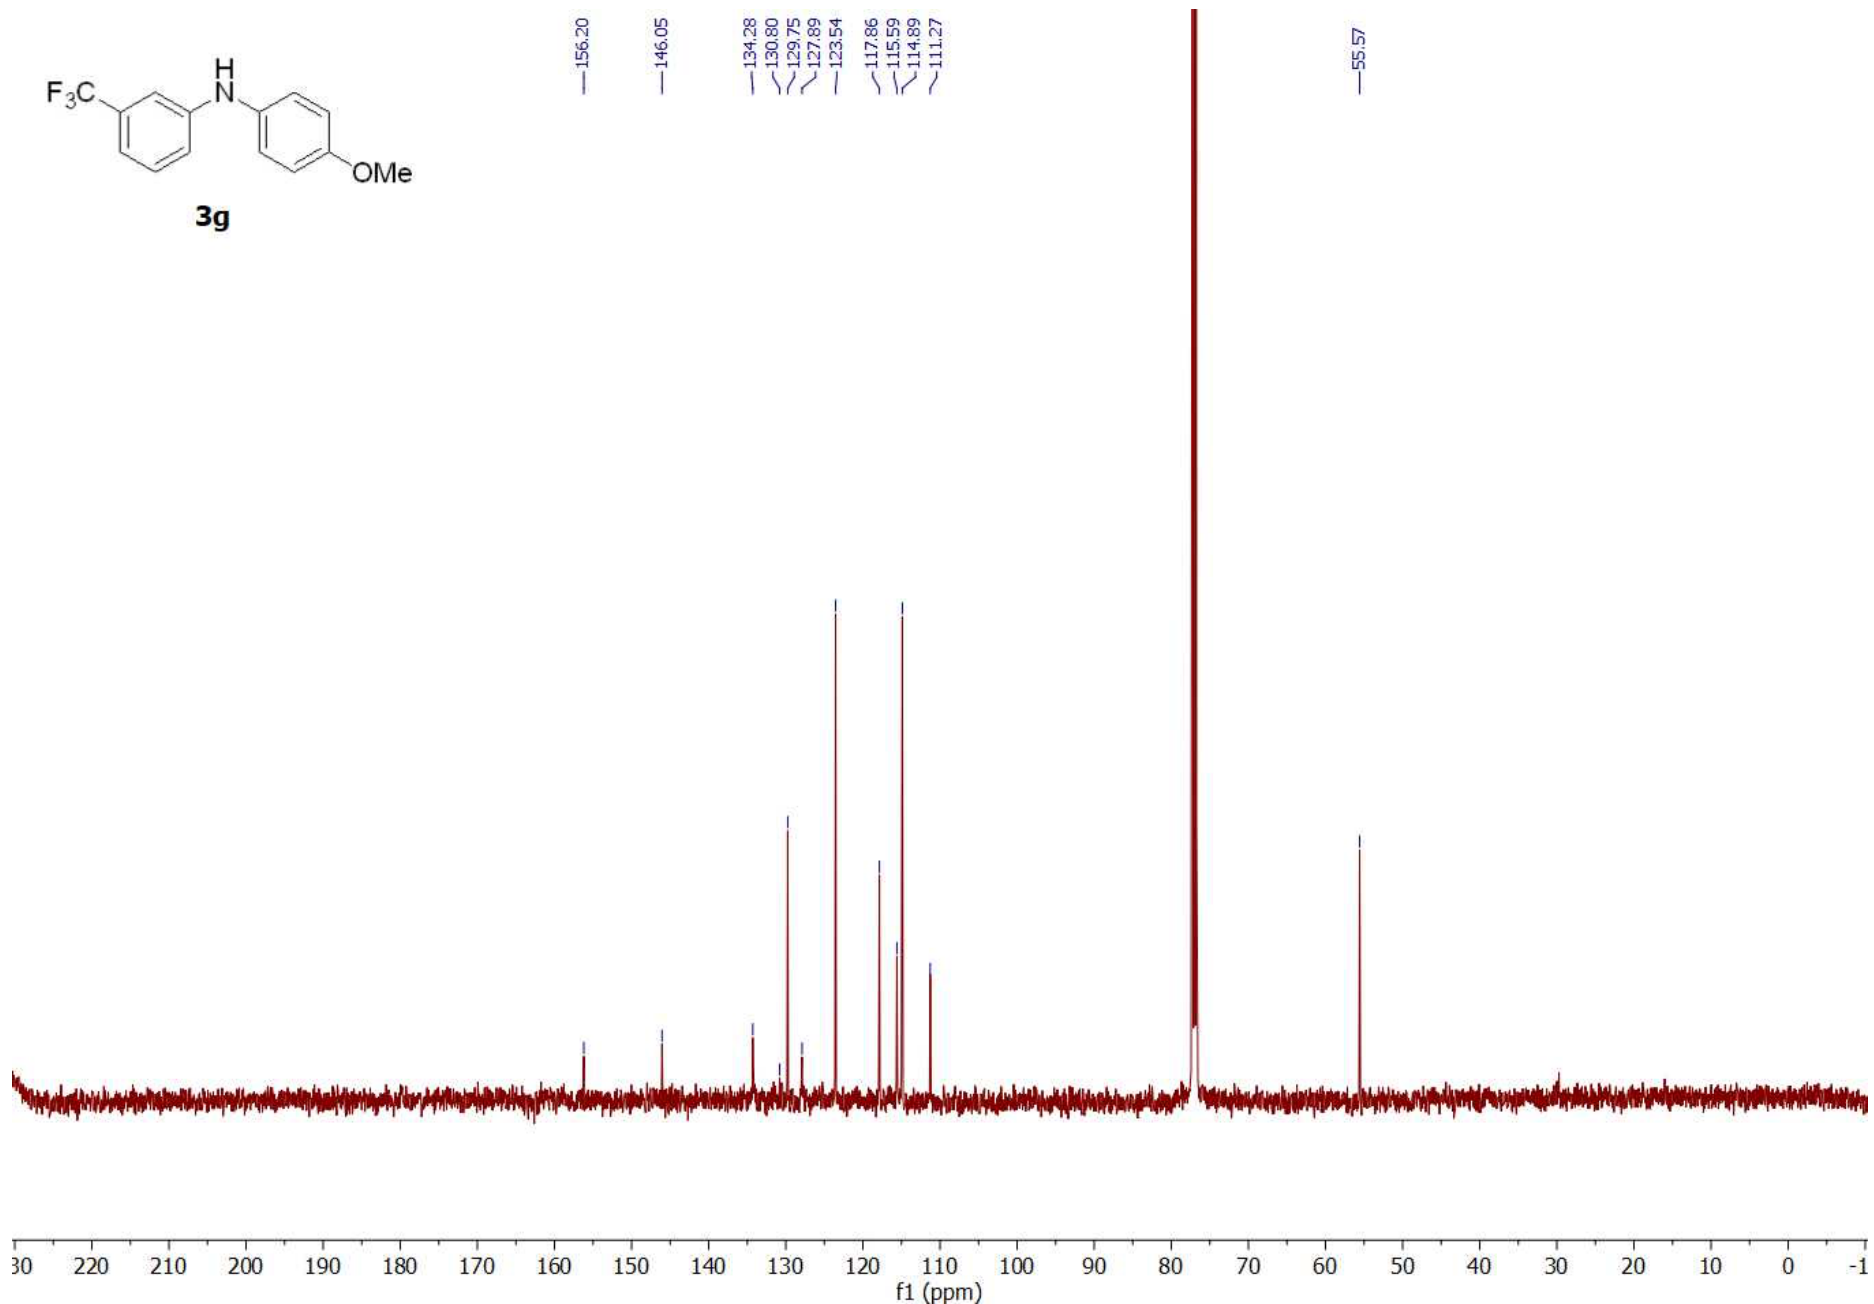



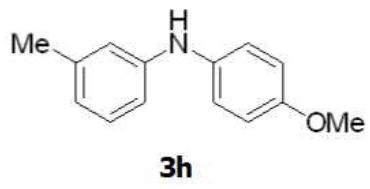

7.12  
7.11  
7.09  
7.08  
7.07  
6.88  
6.86  
6.74  
6.72  
6.68  
6.66

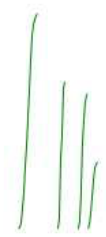

3.81

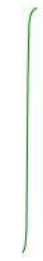

2.29

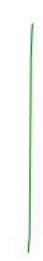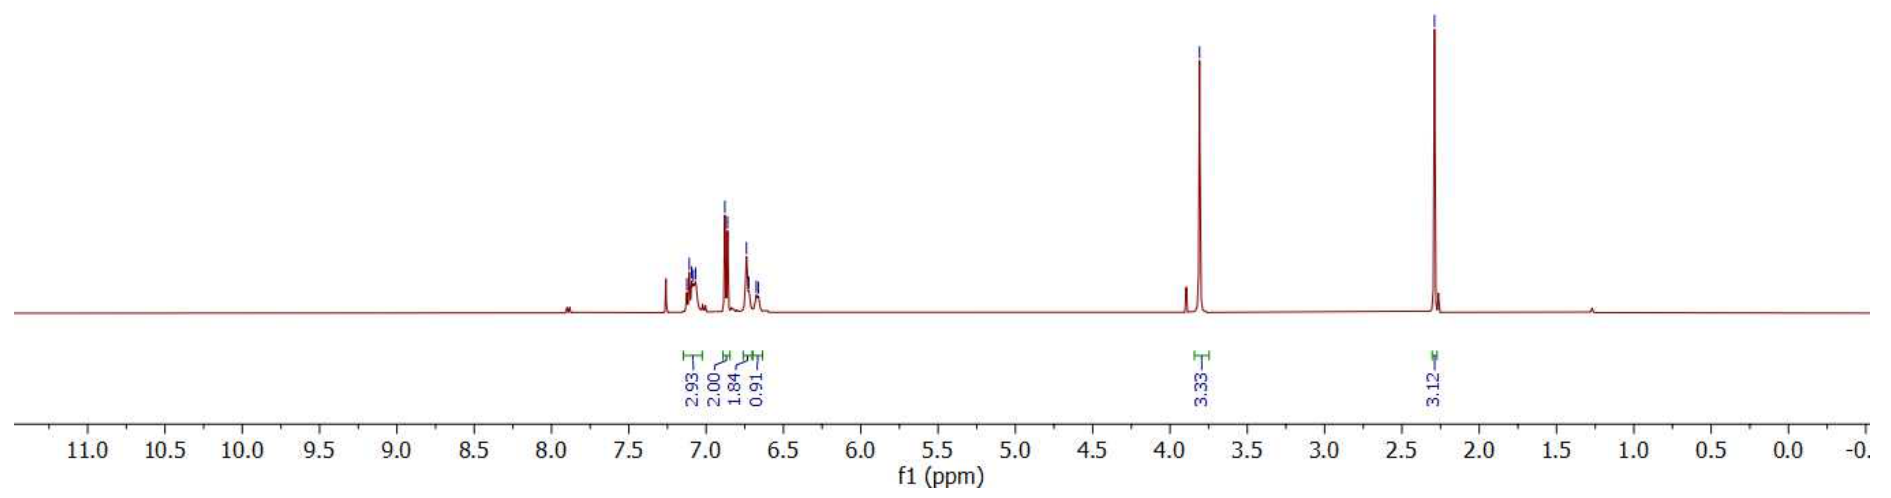

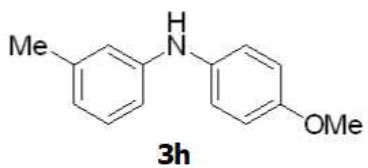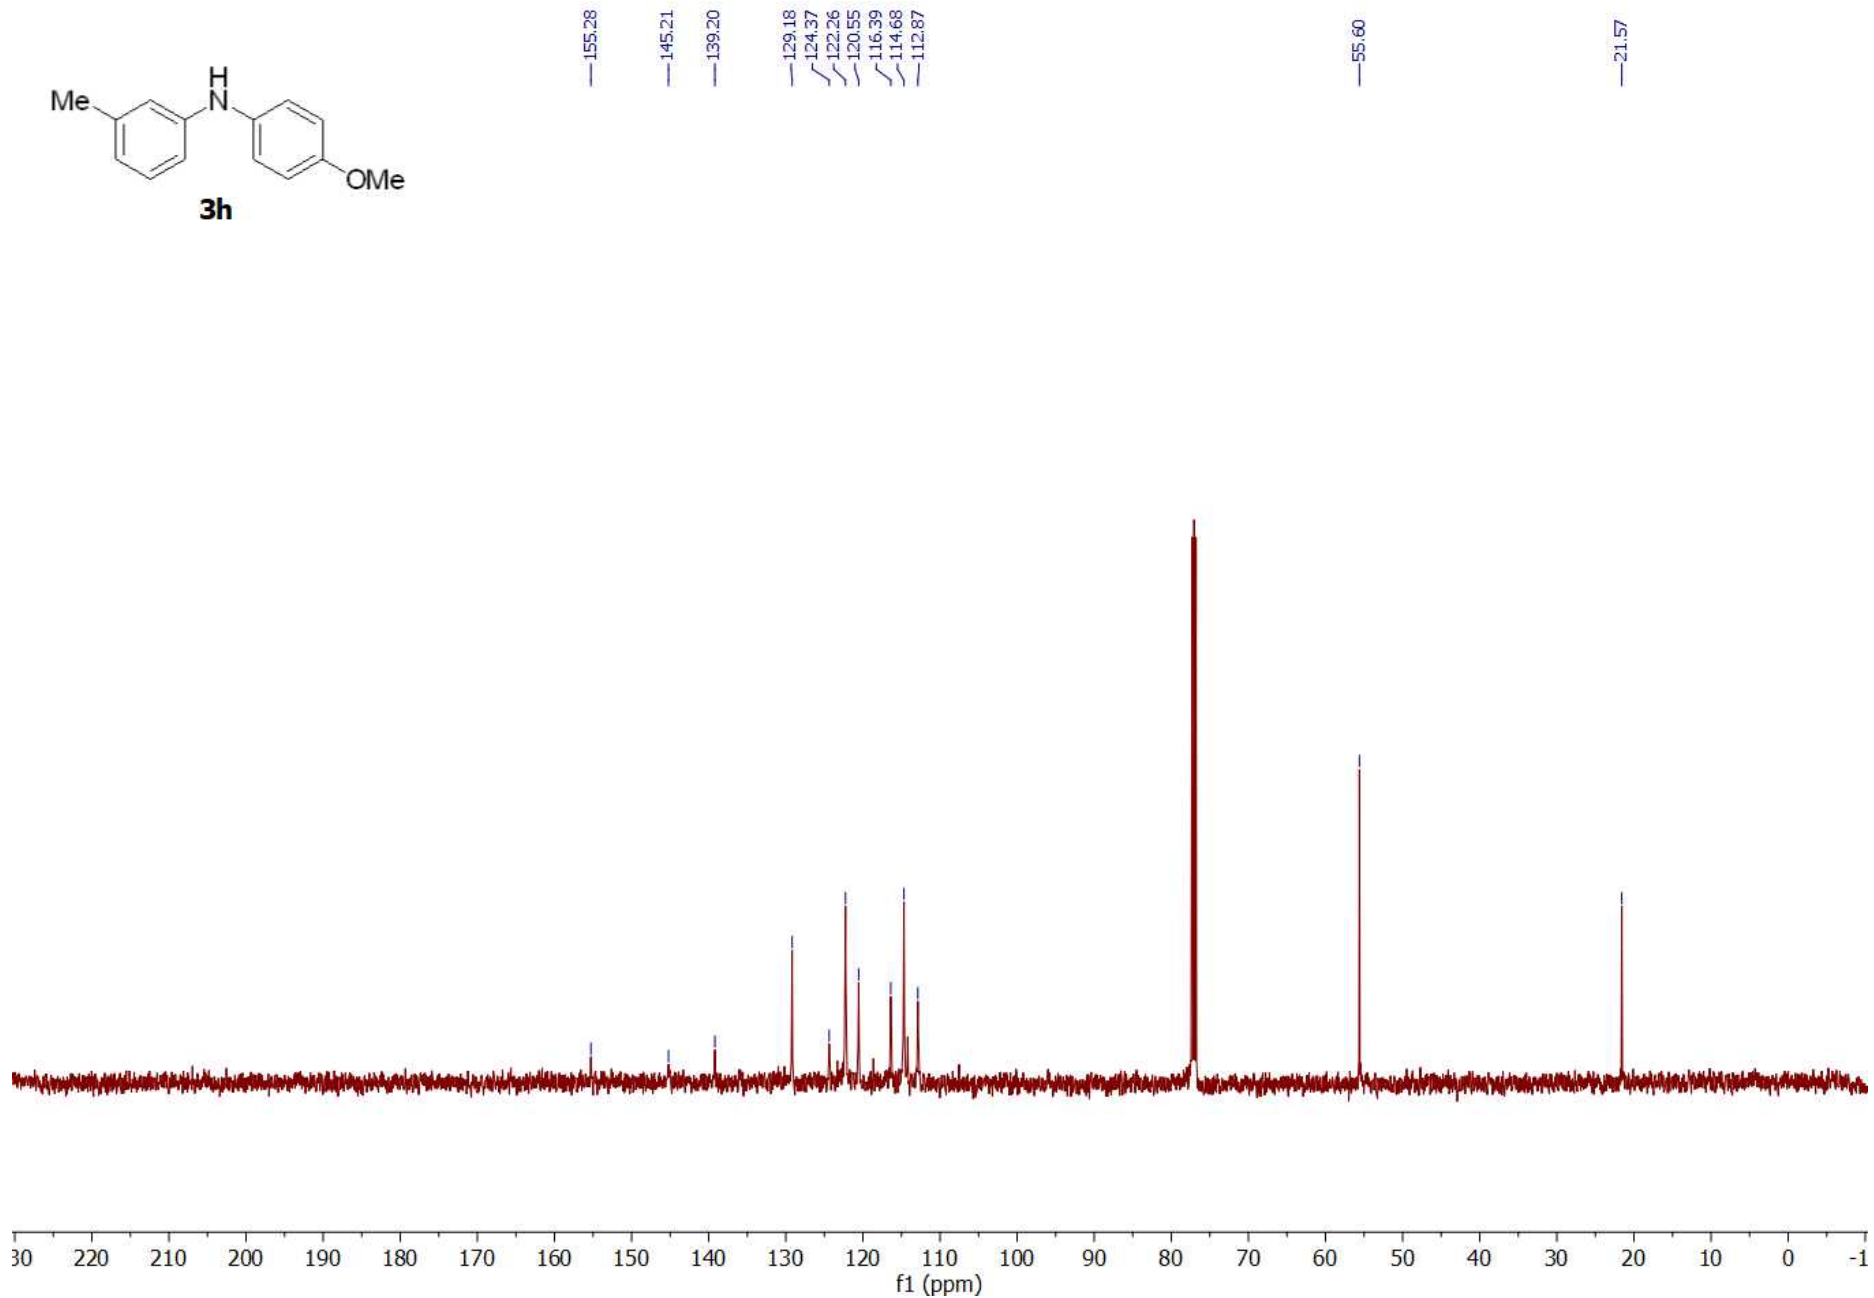

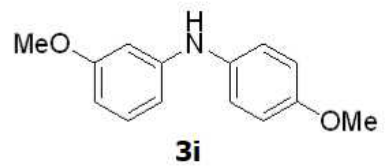

7.13  
7.12  
7.10  
7.08  
6.87  
6.85  
6.50  
6.49  
6.47  
6.40  
6.39  
— 5.62  
3.80  
3.76

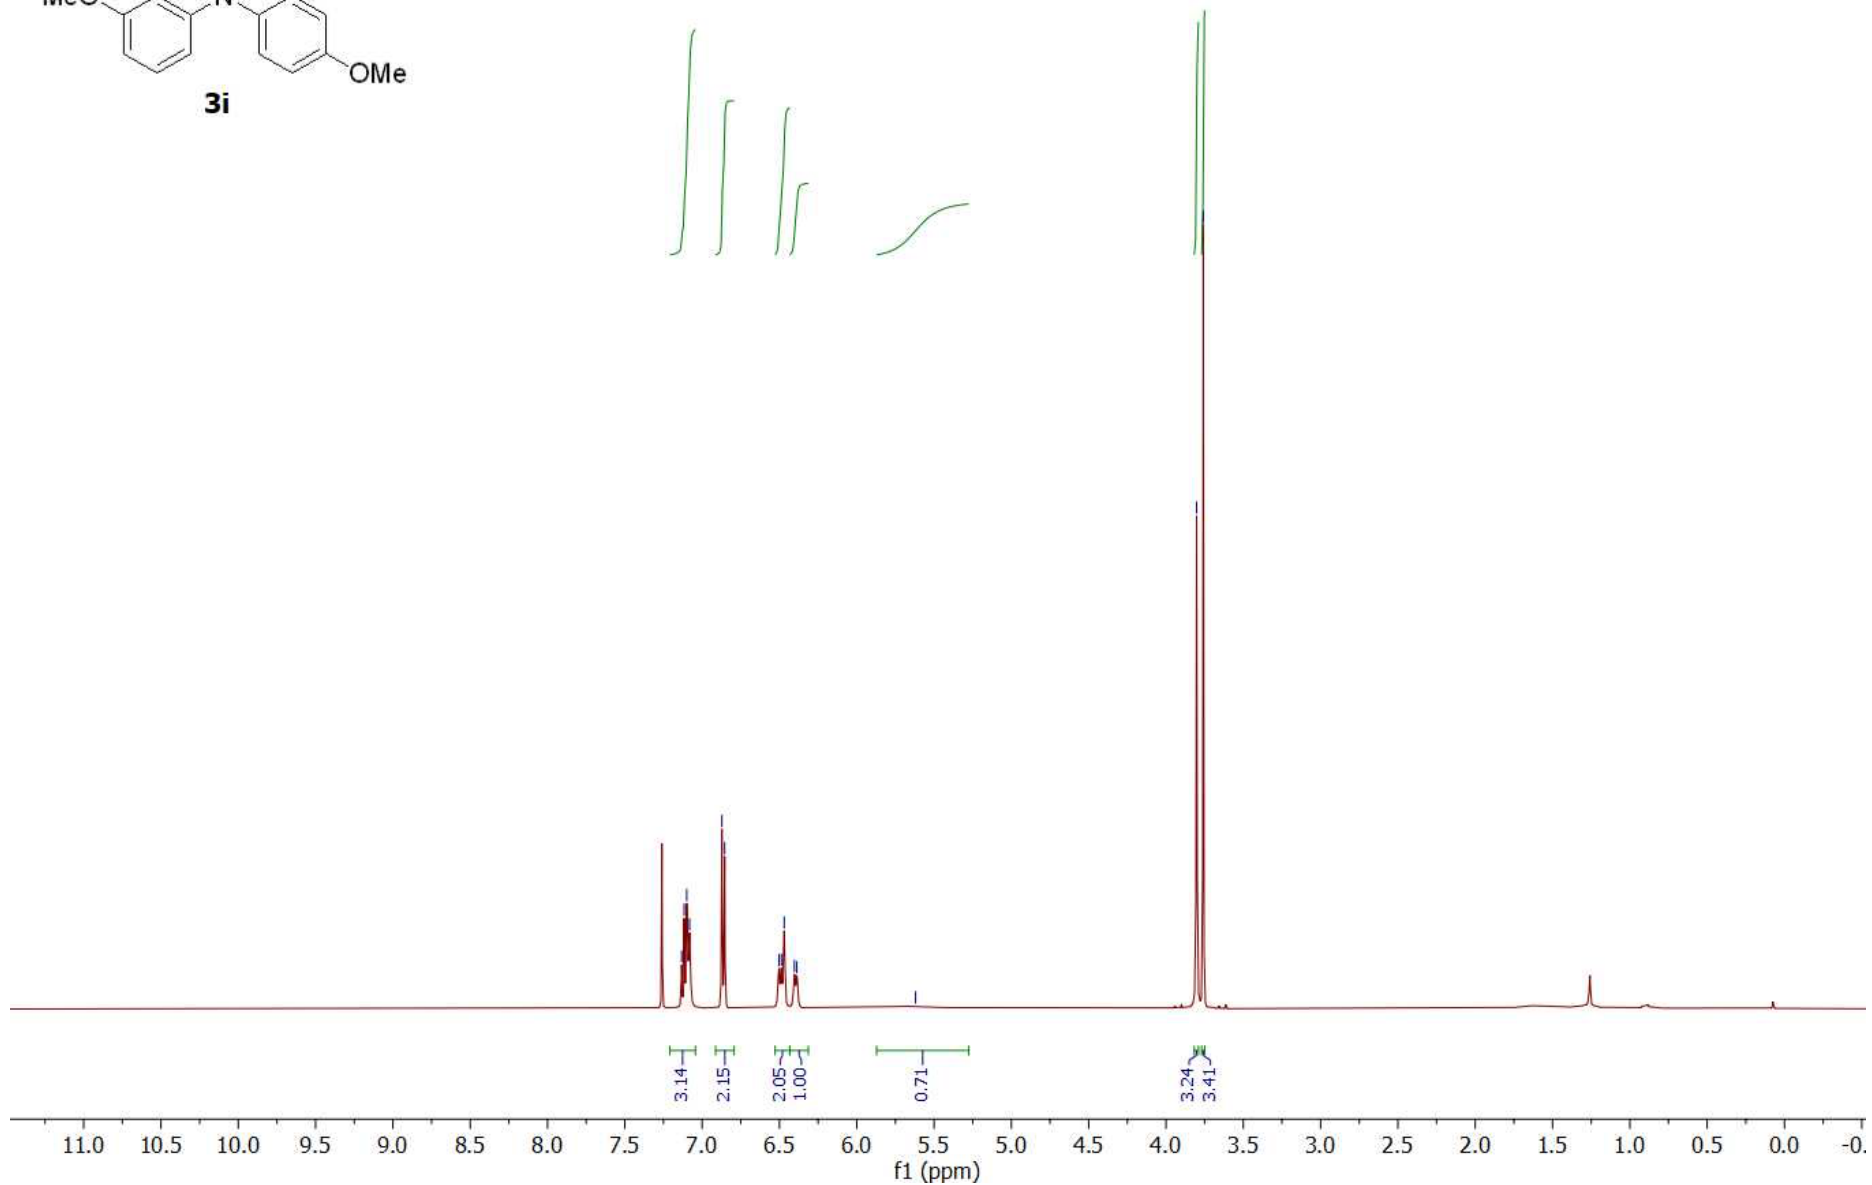

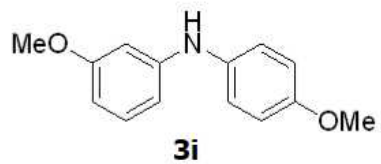

— 160.79  
— 155.53  
— 146.68  
— 135.36  
— 130.08  
— 122.77  
— 114.68  
— 108.40  
— 104.81  
— 101.39  
— 55.59  
— 55.18

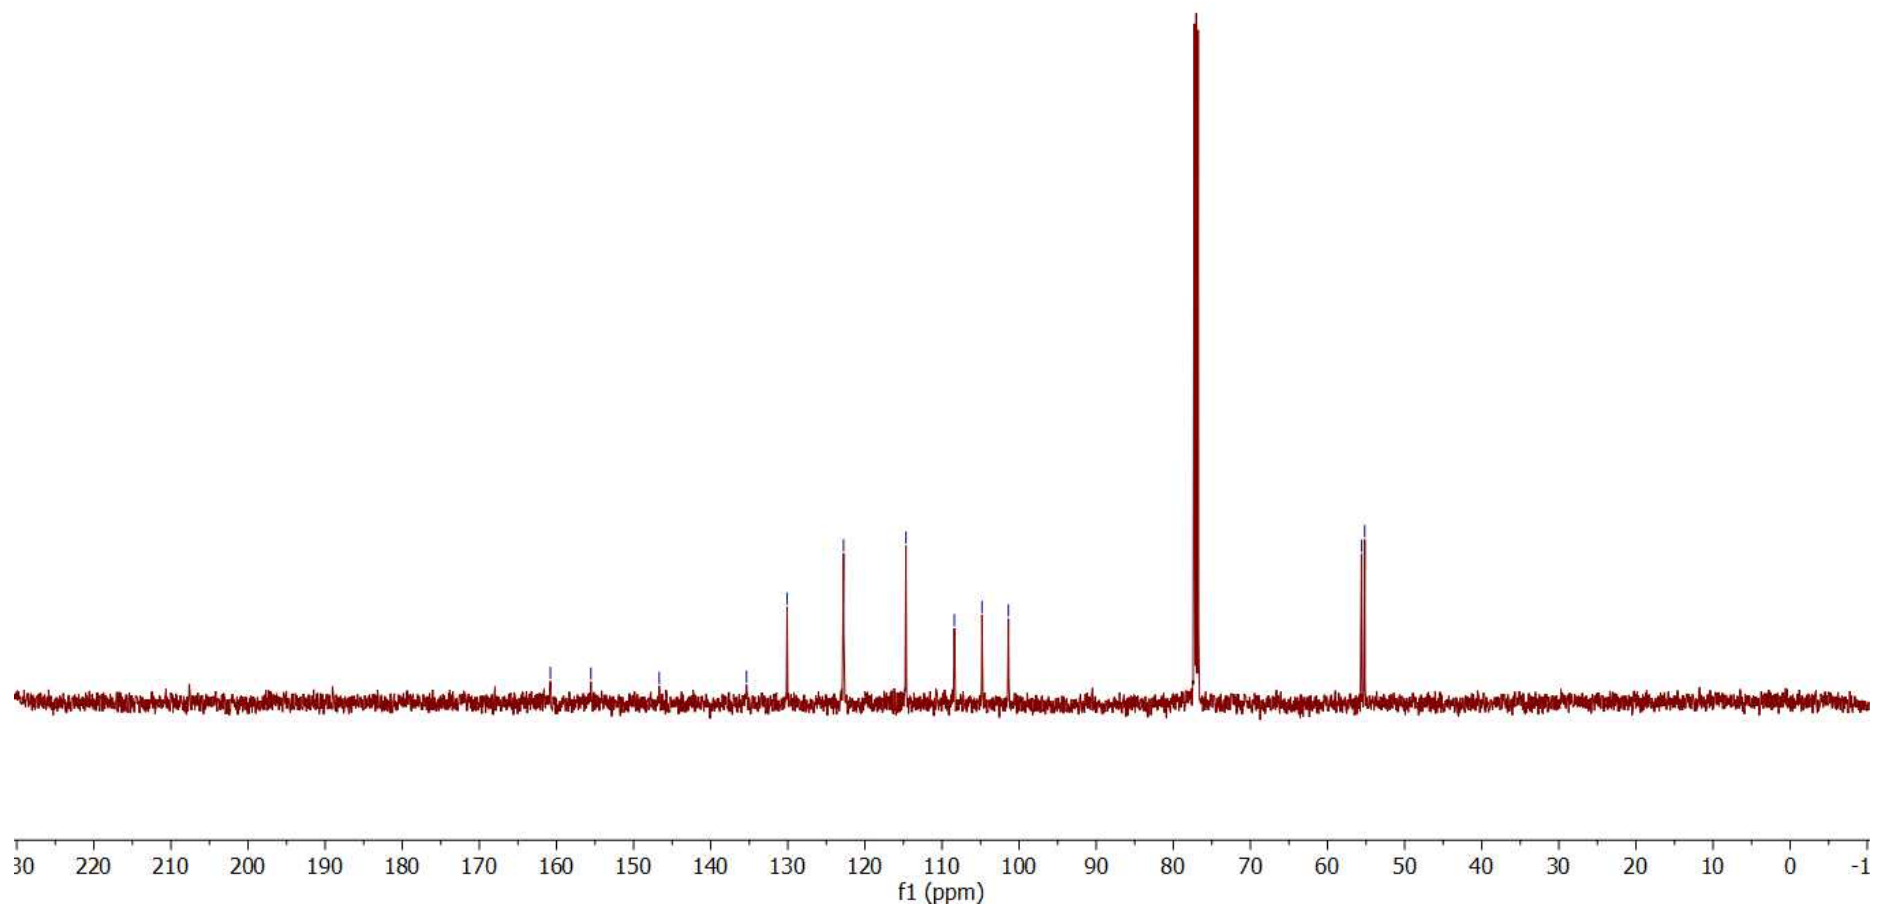

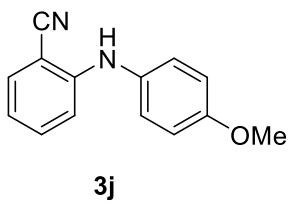

7.47  
7.45  
7.32  
7.30  
7.29  
7.26  
7.16  
7.14  
6.93  
6.91  
6.89  
6.77  
6.76  
6.74  
6.18

3.83

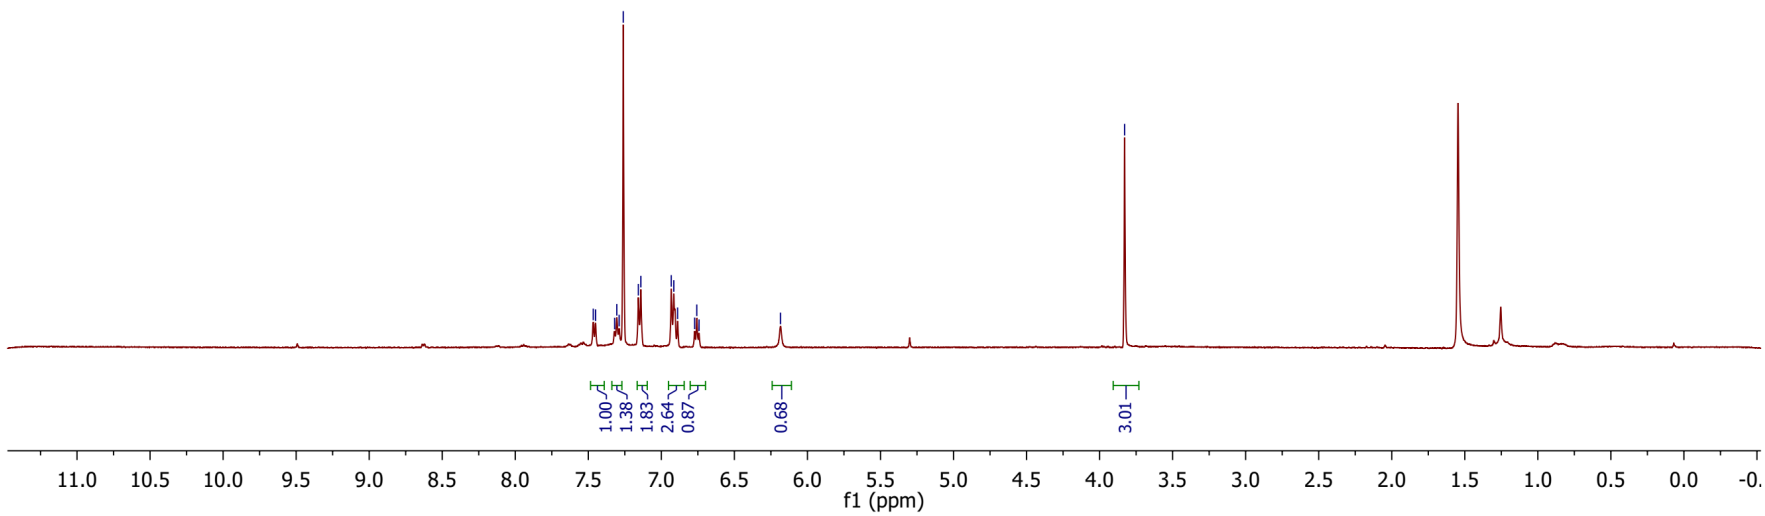

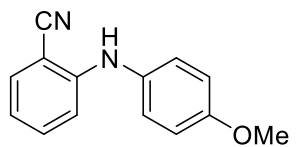

**3j**

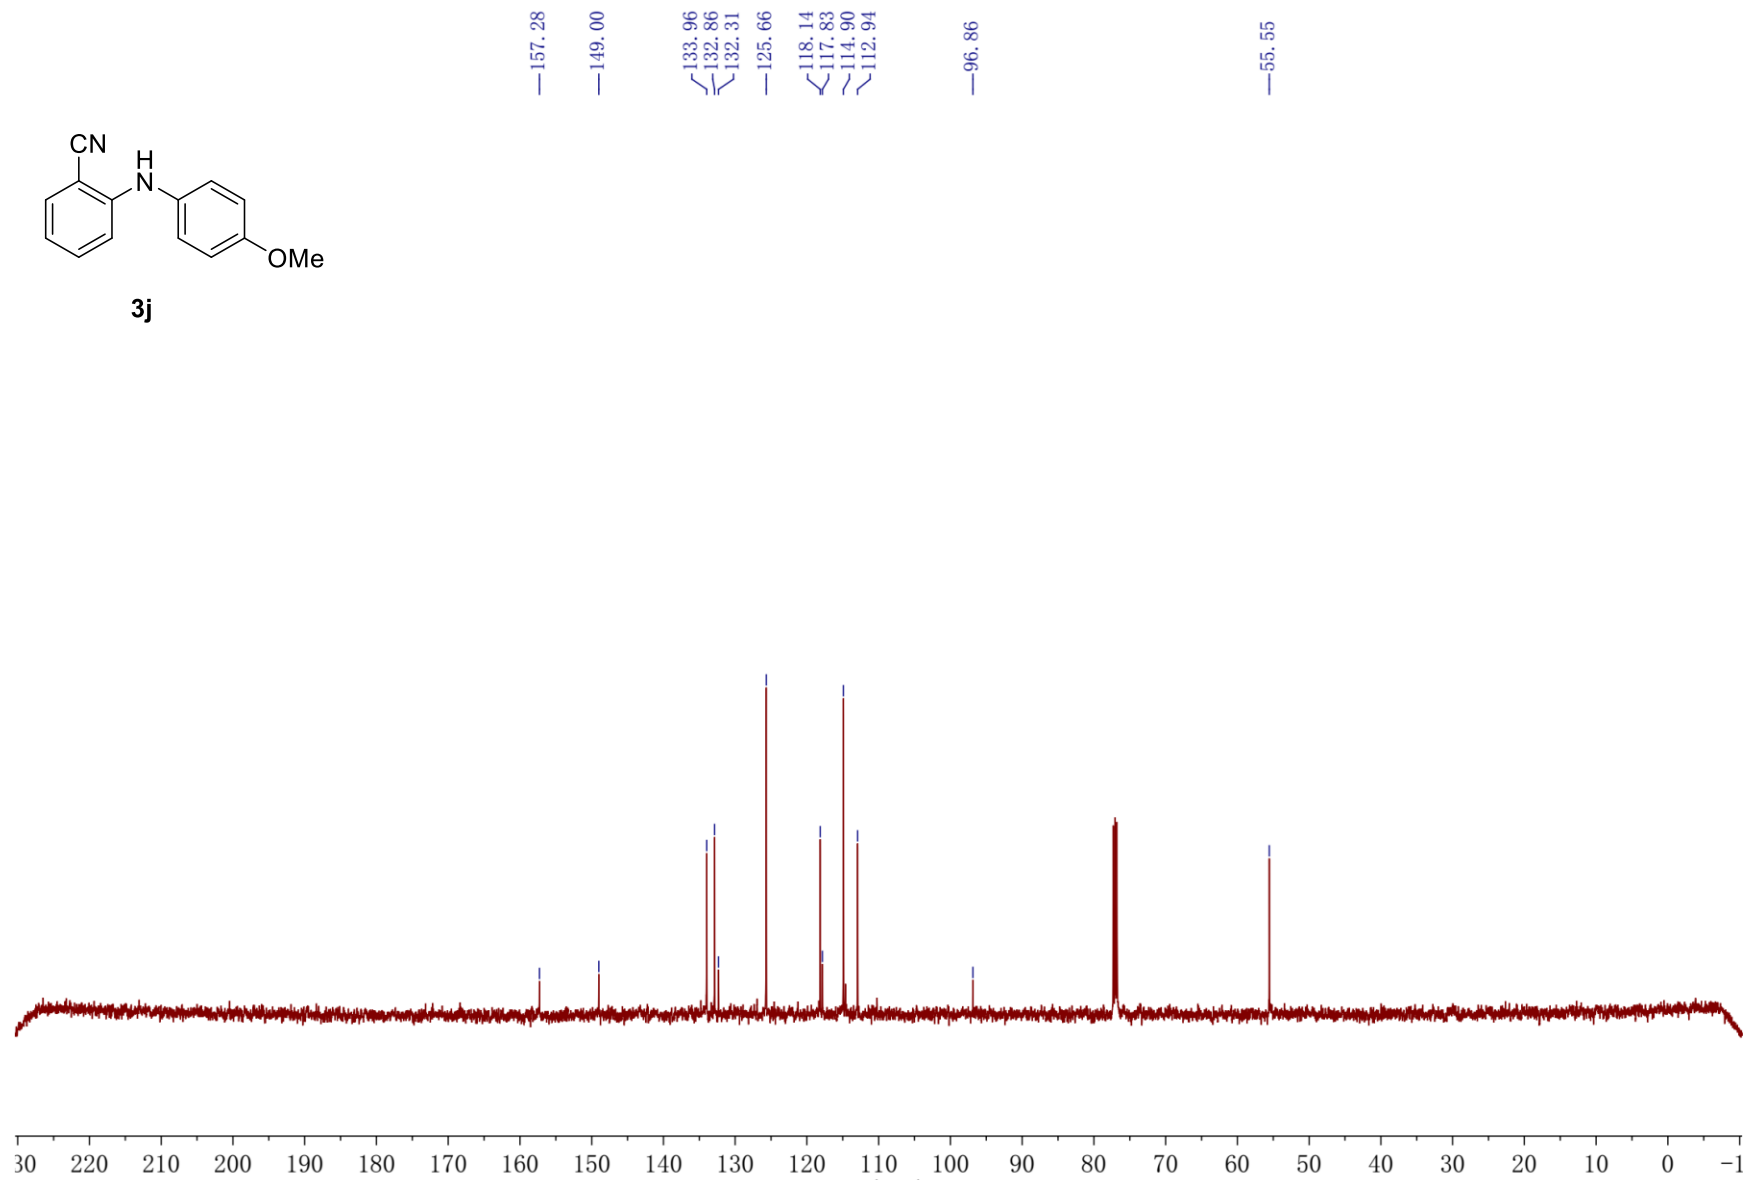

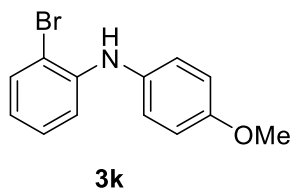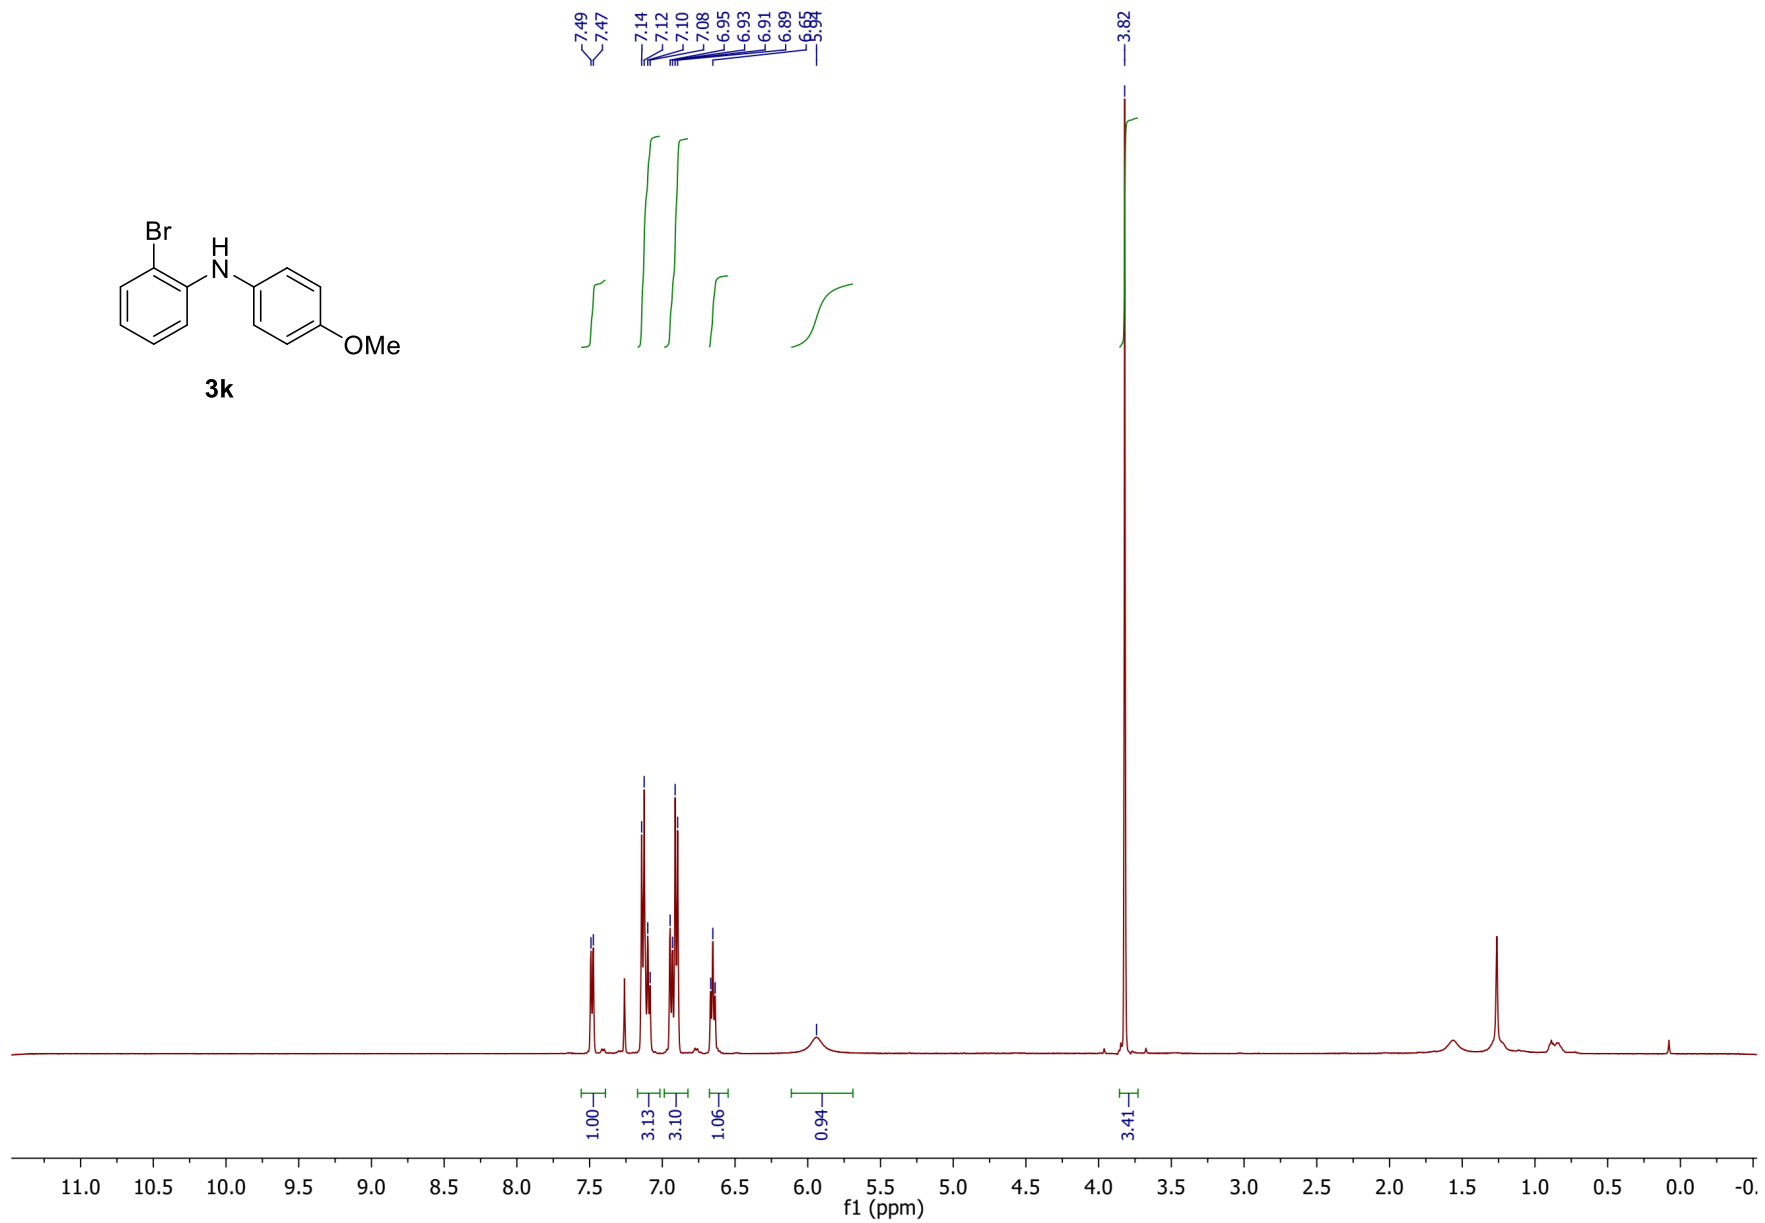

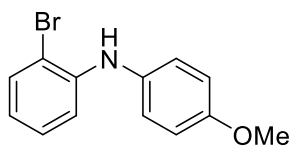

**3k**

—156.43

—143.28

—134.15

—132.78

—128.16

—124.72

—119.58

—114.77

—114.01

—110.56

—55.57

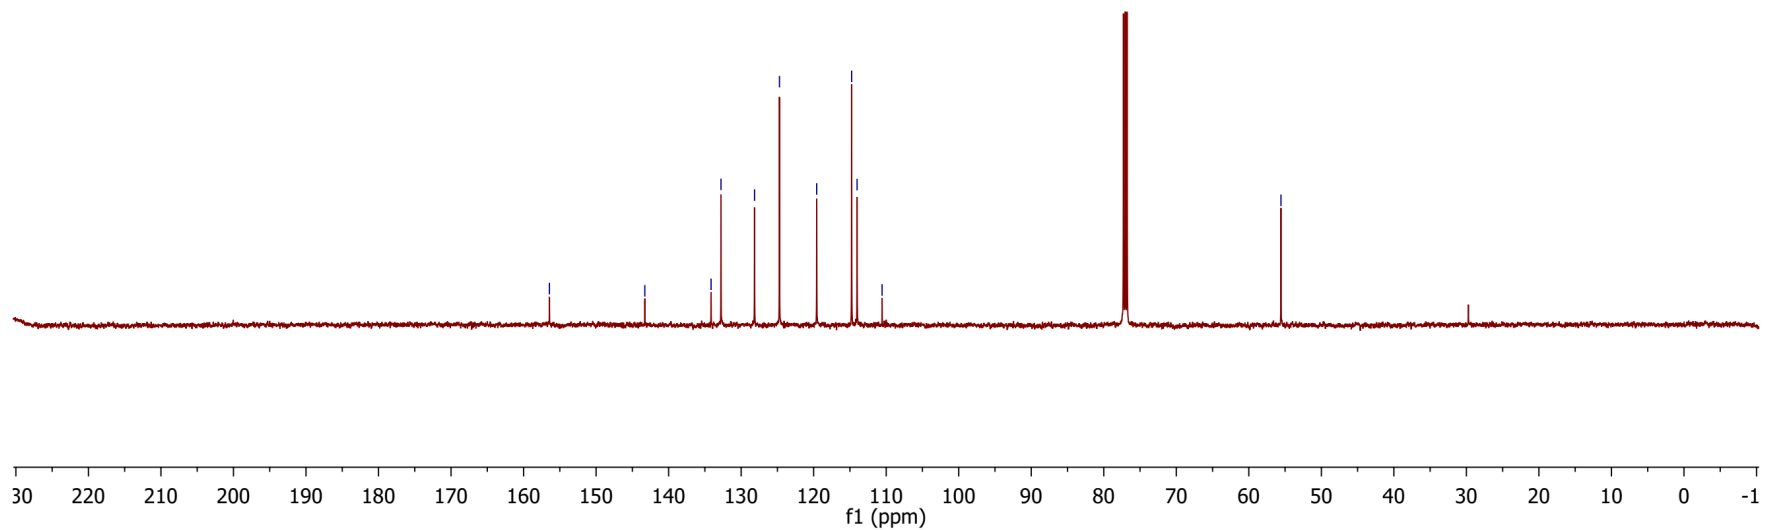



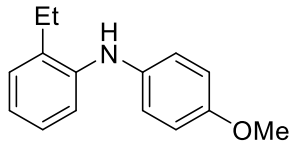

3I

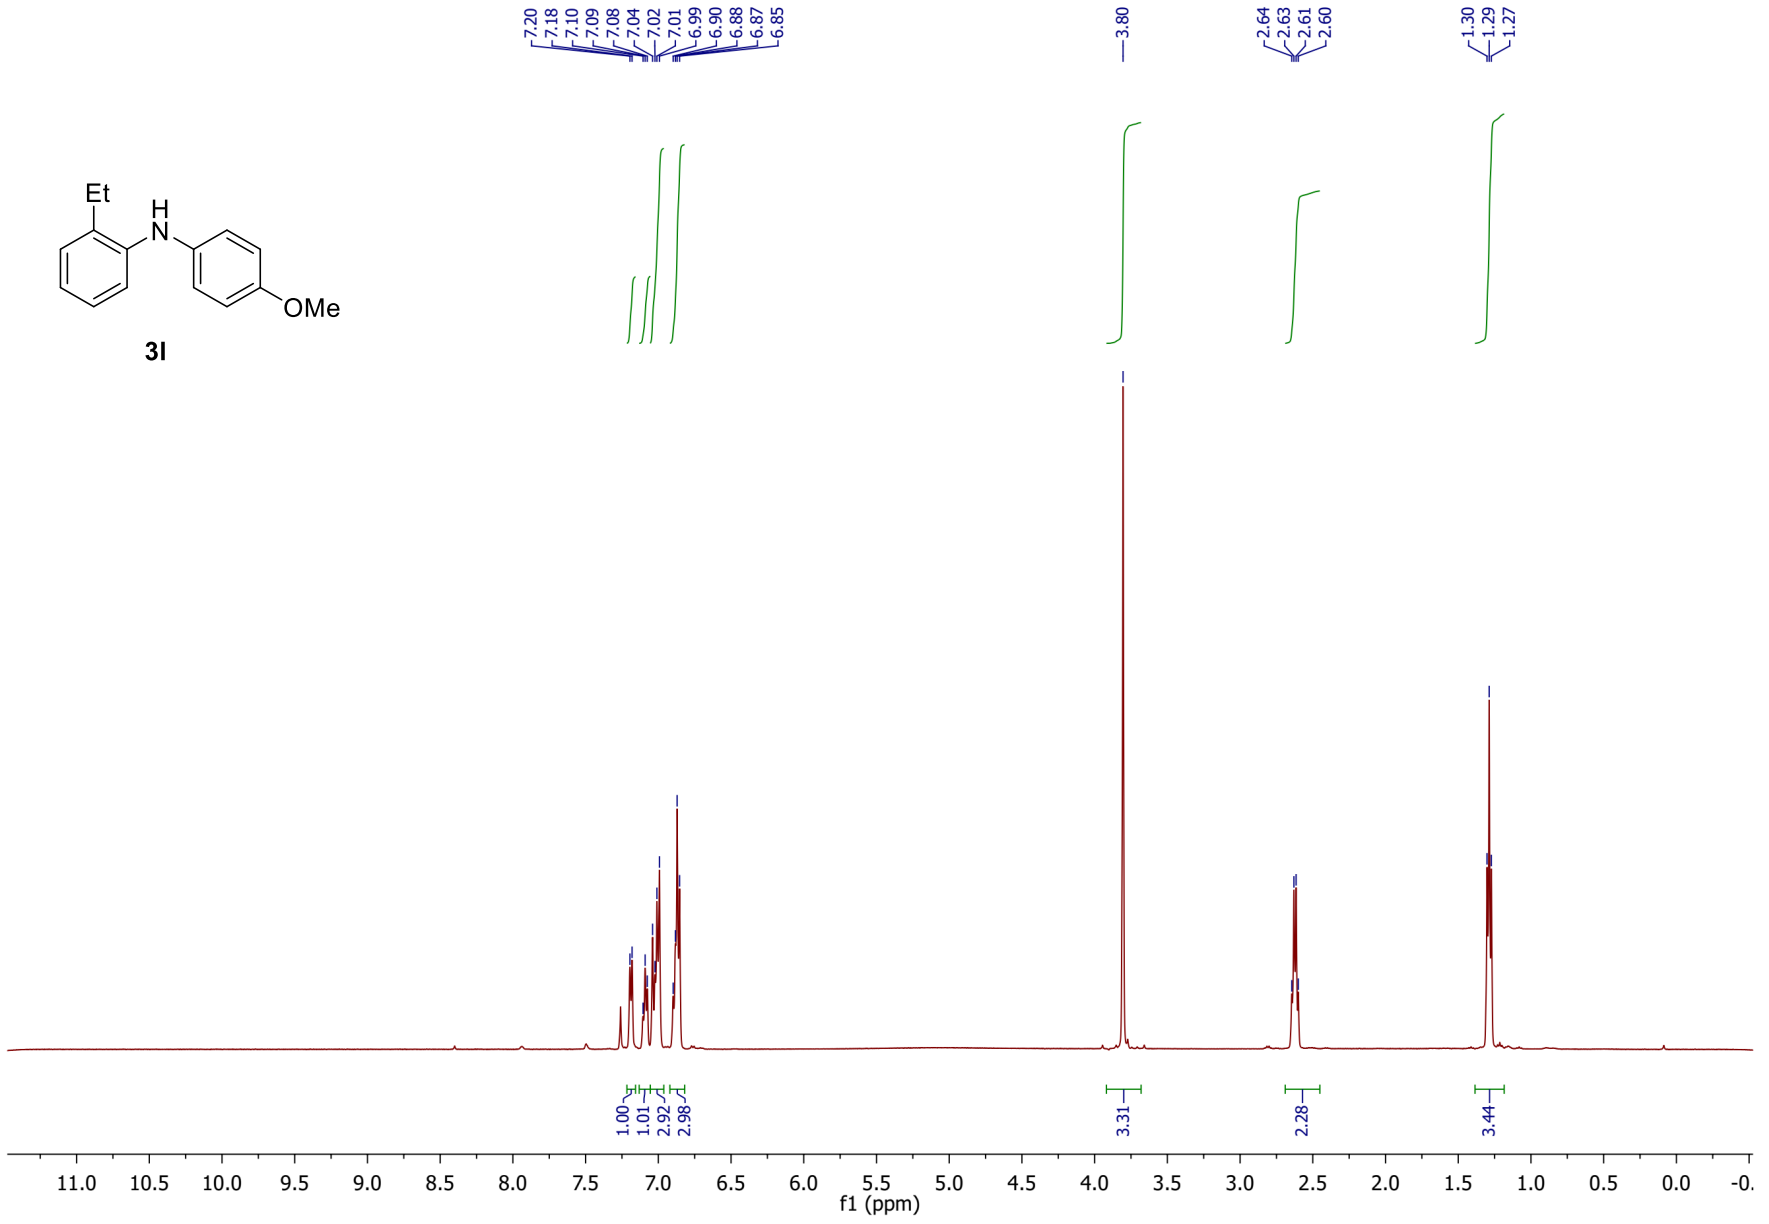

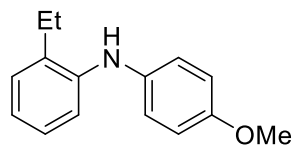

3I

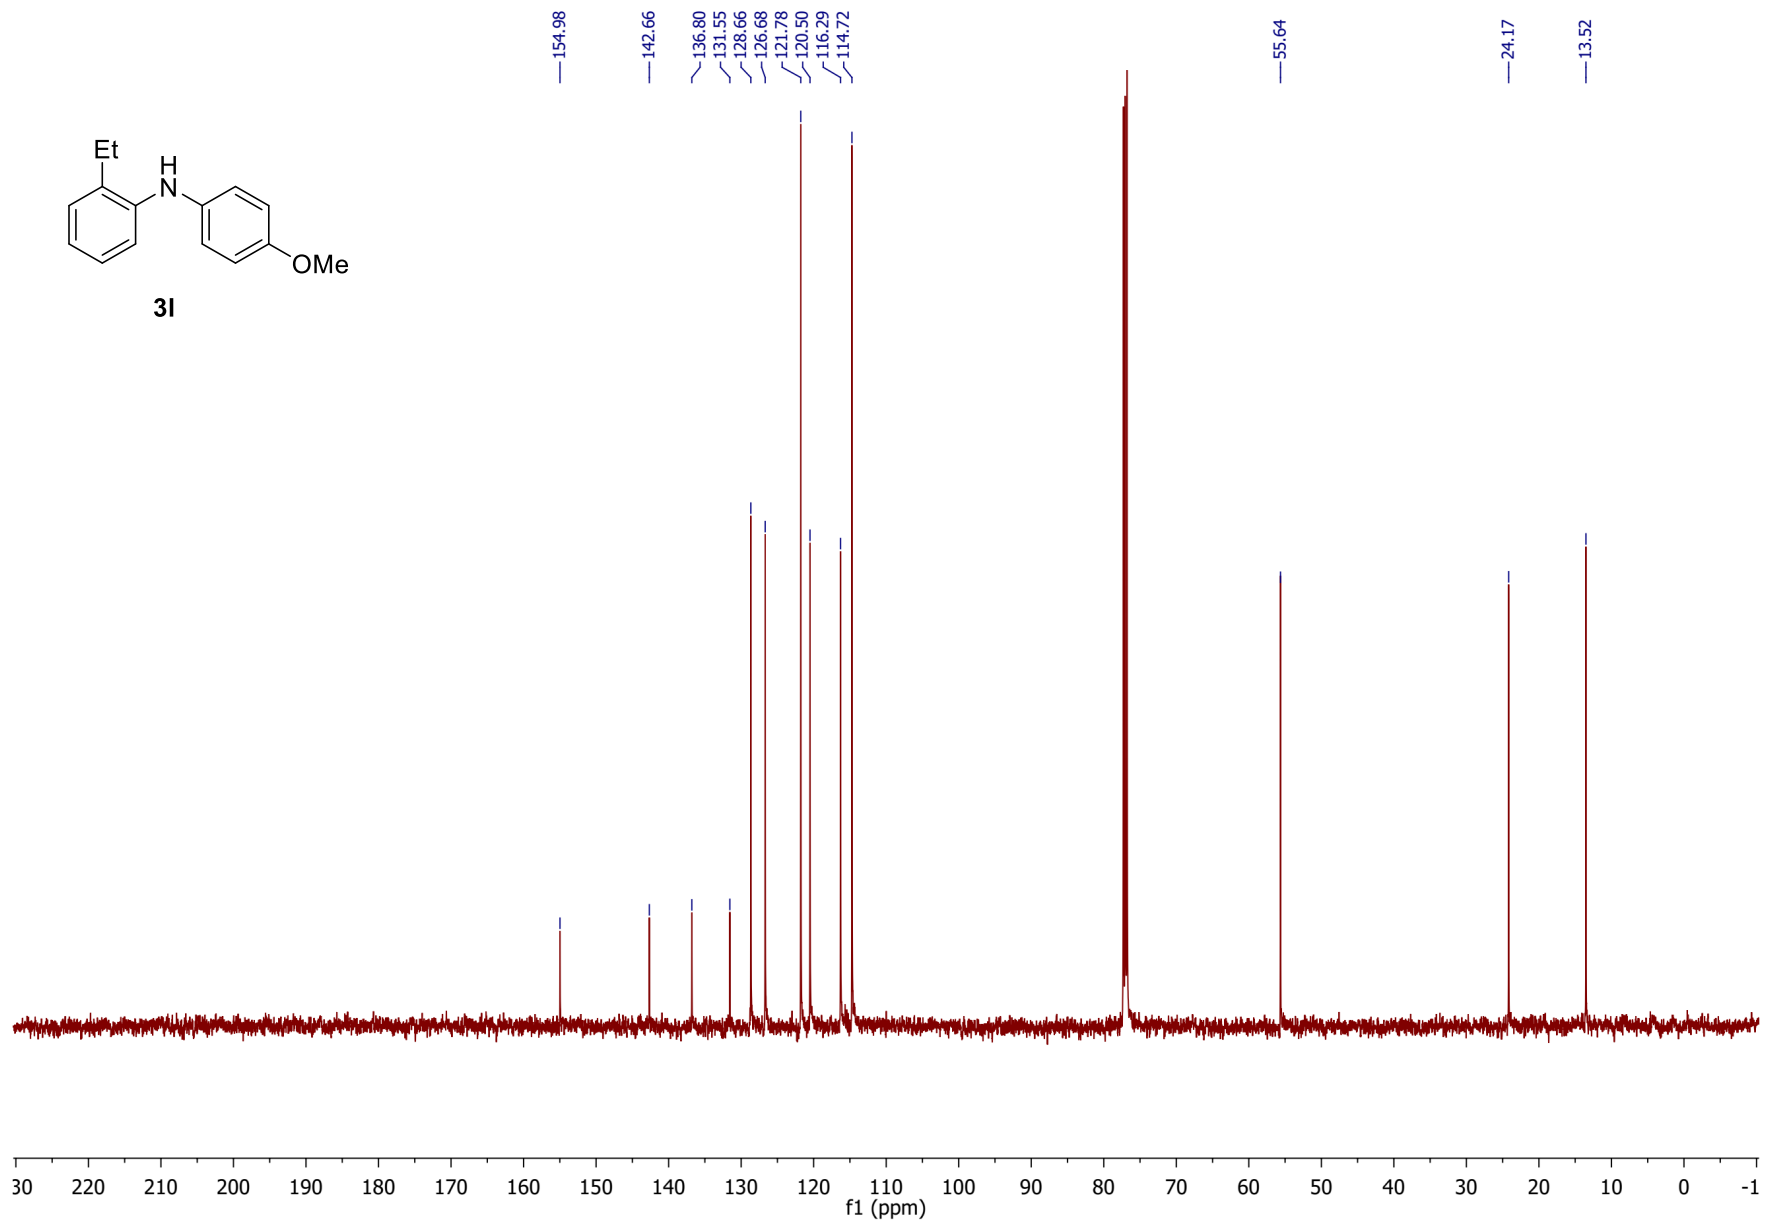

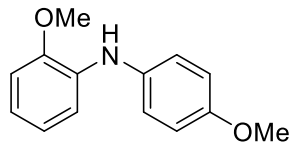

3m

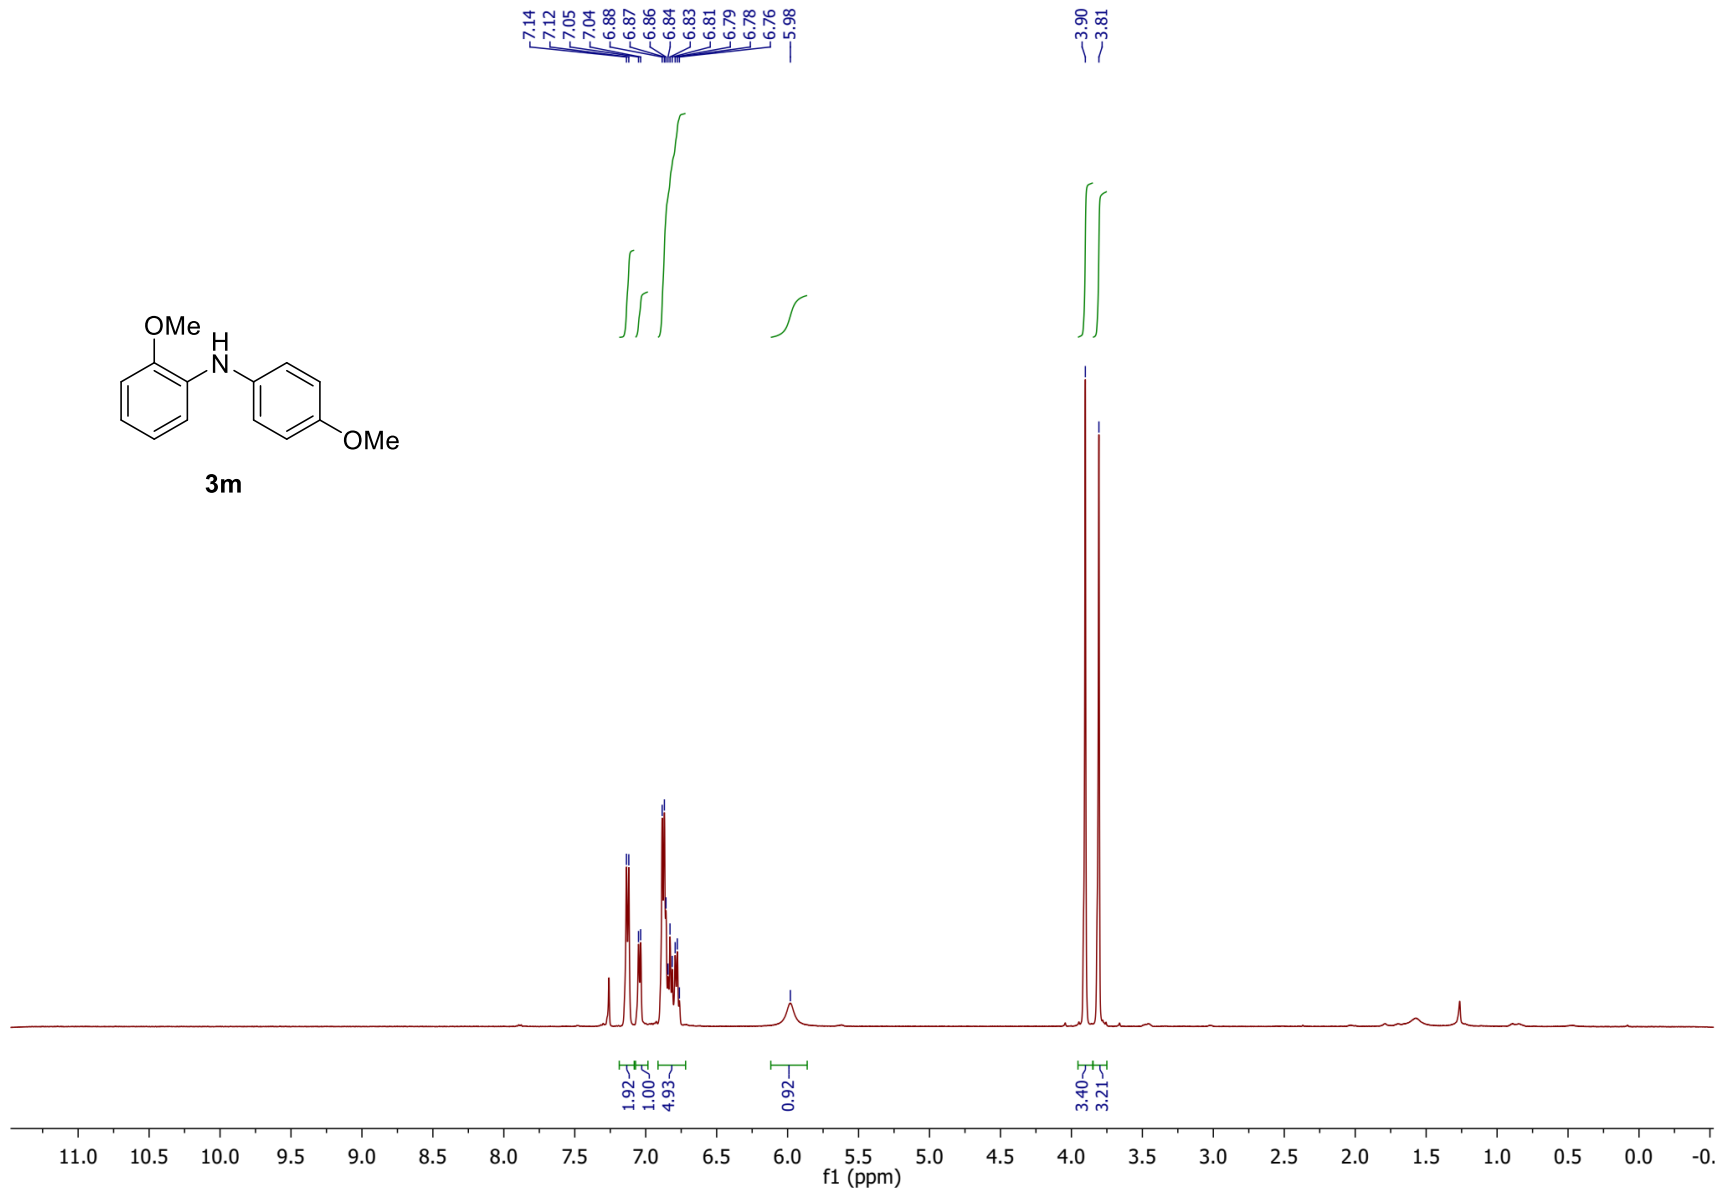

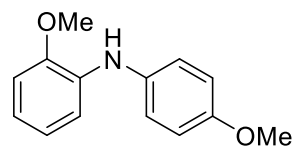

**3m**

— 155.31

— 147.40

~ 135.44

~ 135.06

~ 122.78

~ 120.95

~ 118.57

~ 114.63

~ 112.63

~ 110.24

— 55.59

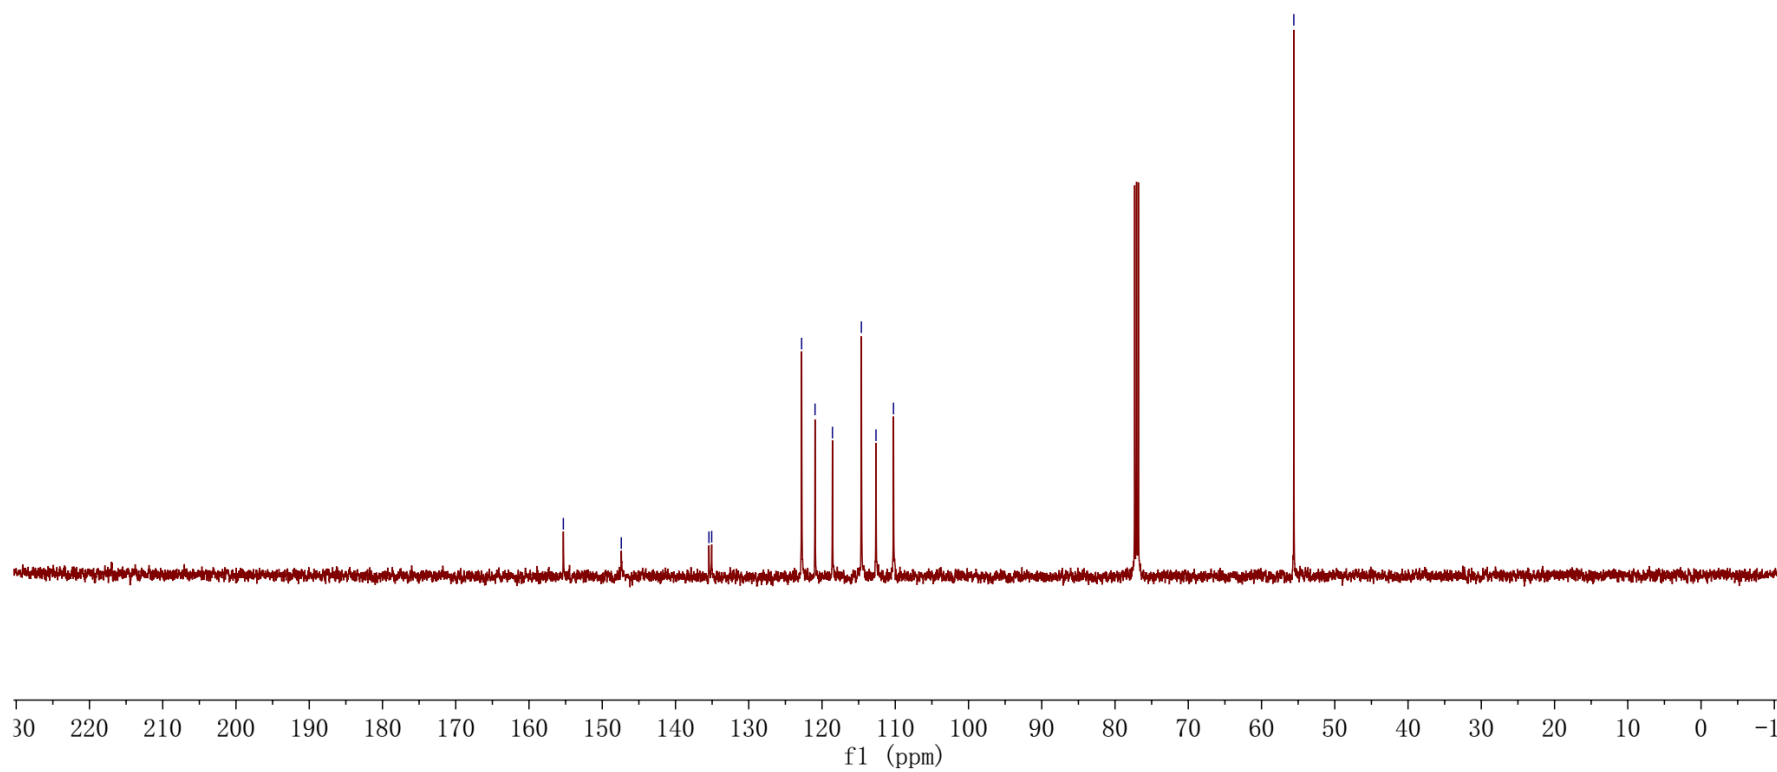

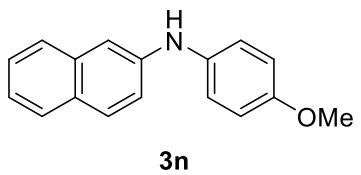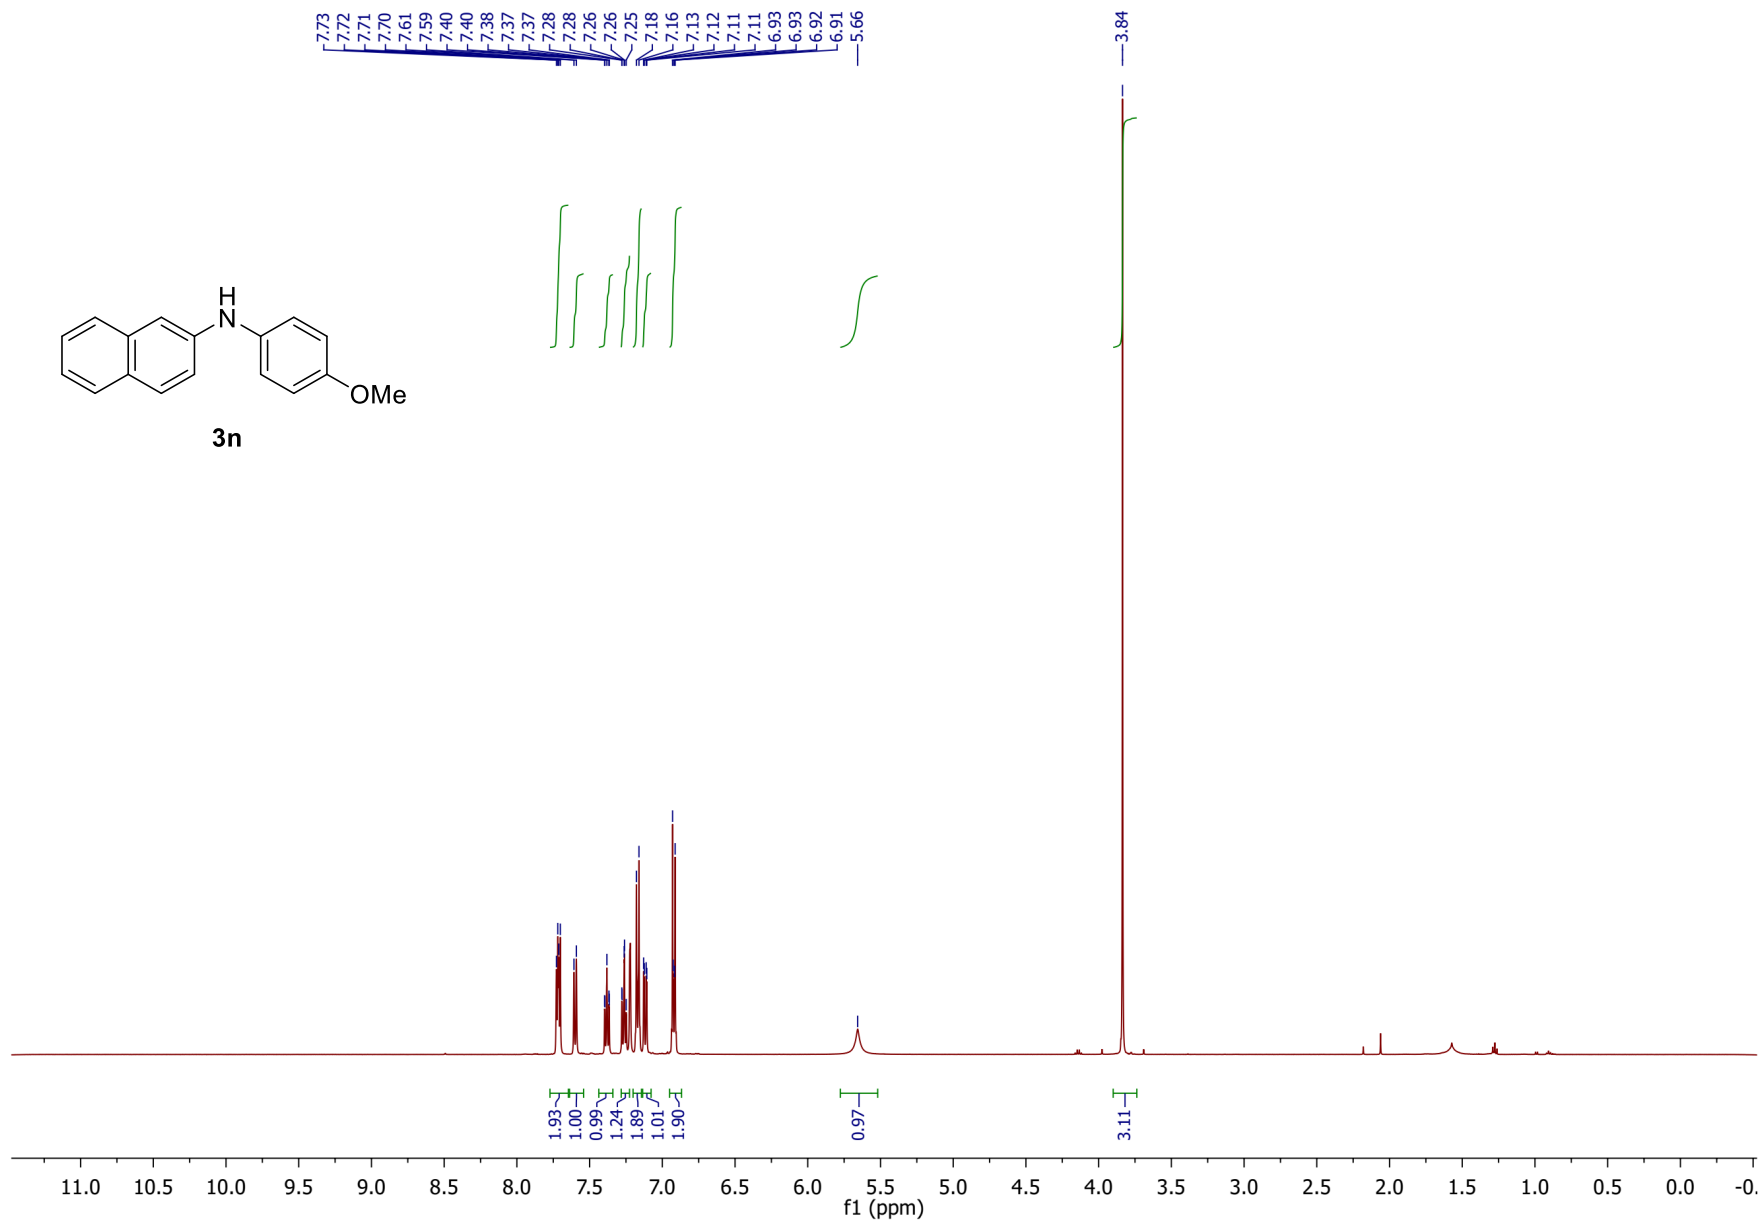

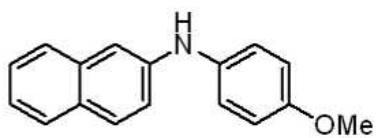

**3n**

—153.20  
—148.95

✓134.22  
✓128.61  
✓126.18  
✓126.01  
✓125.36  
✓121.84  
✓121.07  
—120.93  
—114.80  
—111.74

—55.64

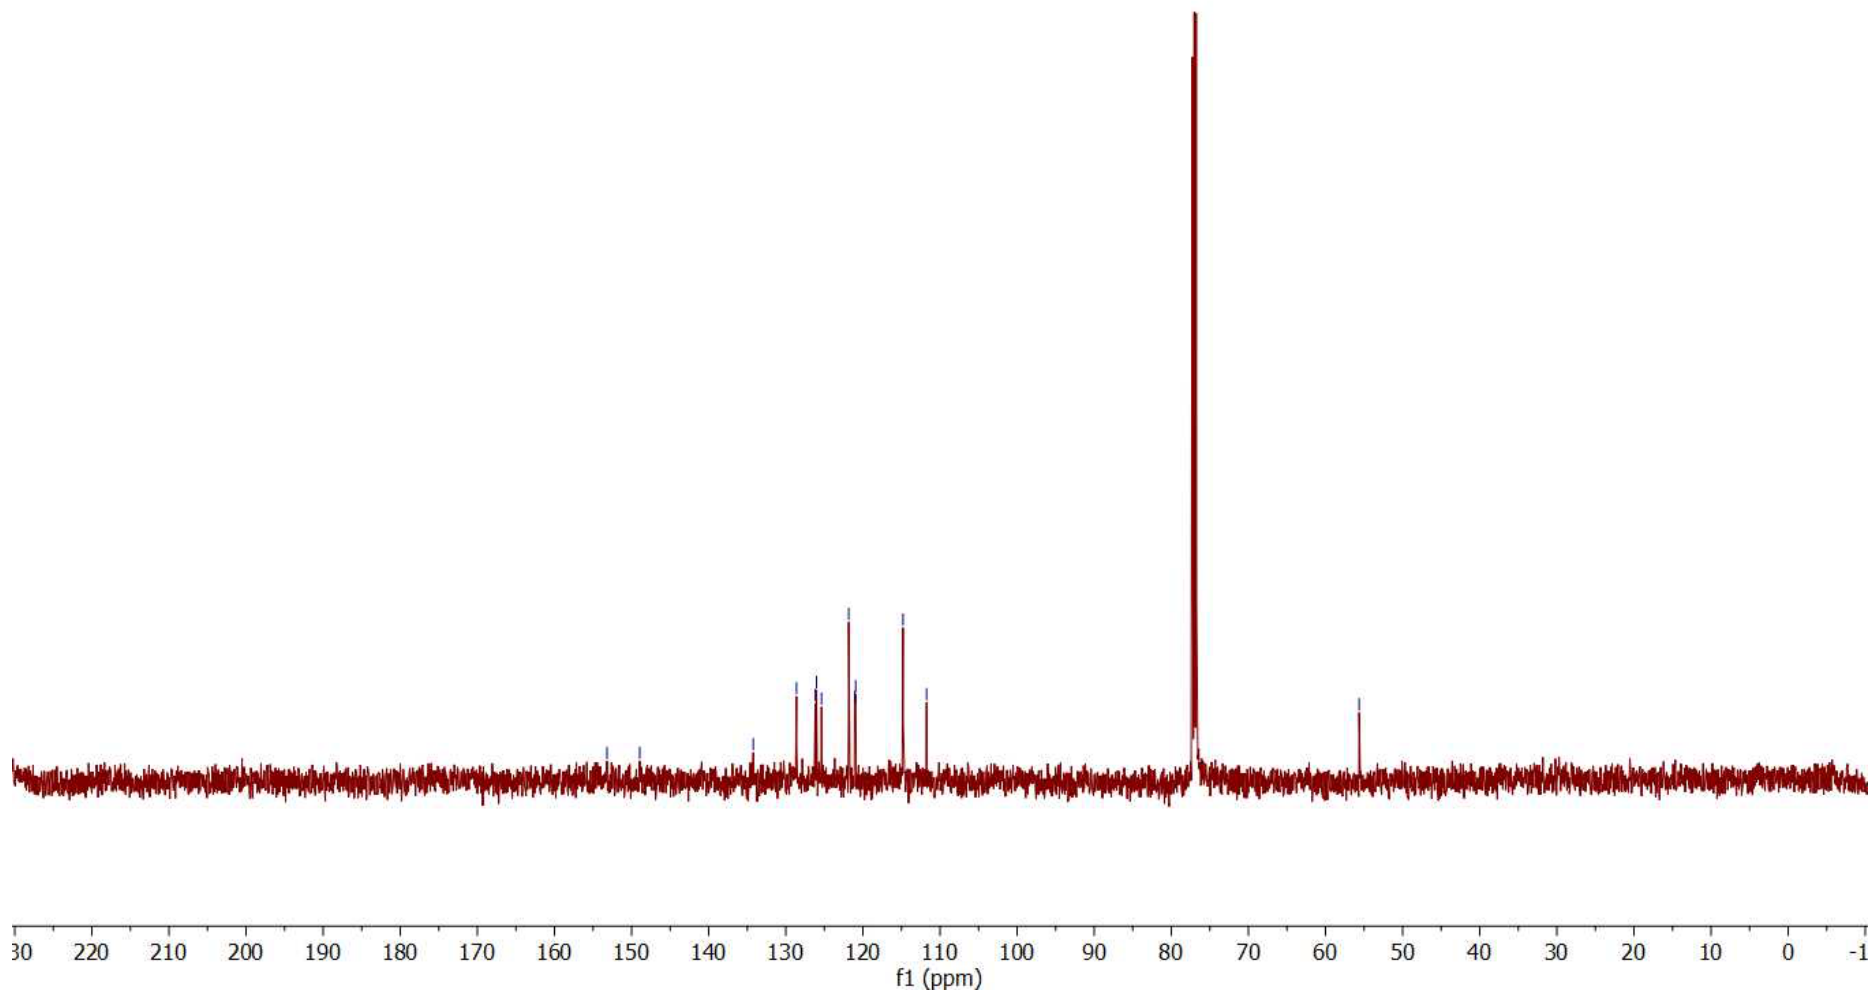

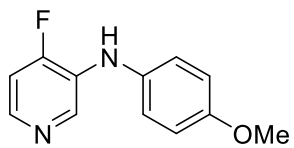

3o

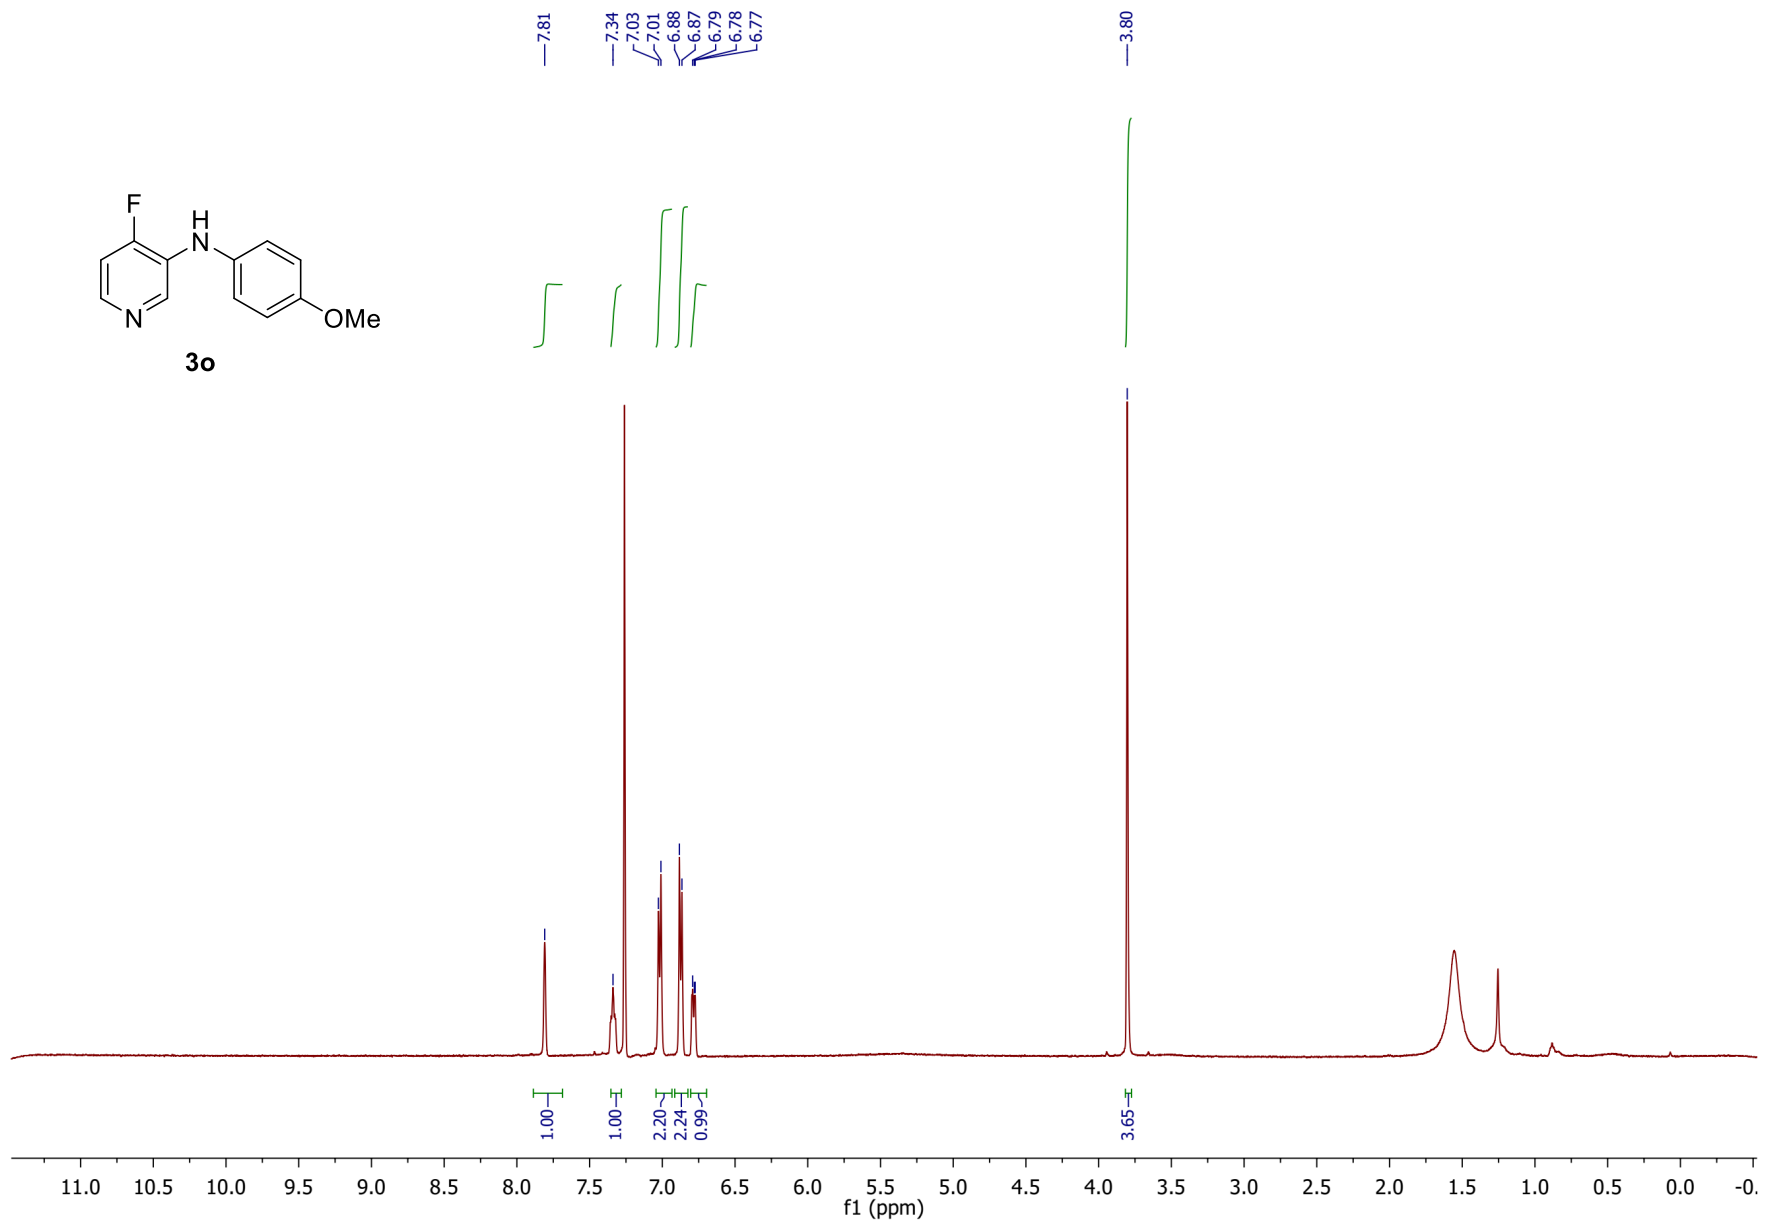

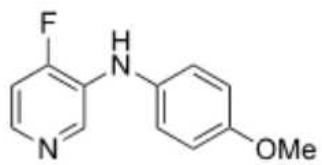

3o

158.74  
155.80  
139.66  
135.15  
134.89  
134.77  
131.67  
128.52  
128.46  
121.94  
114.95  
109.53  
109.22

55.61

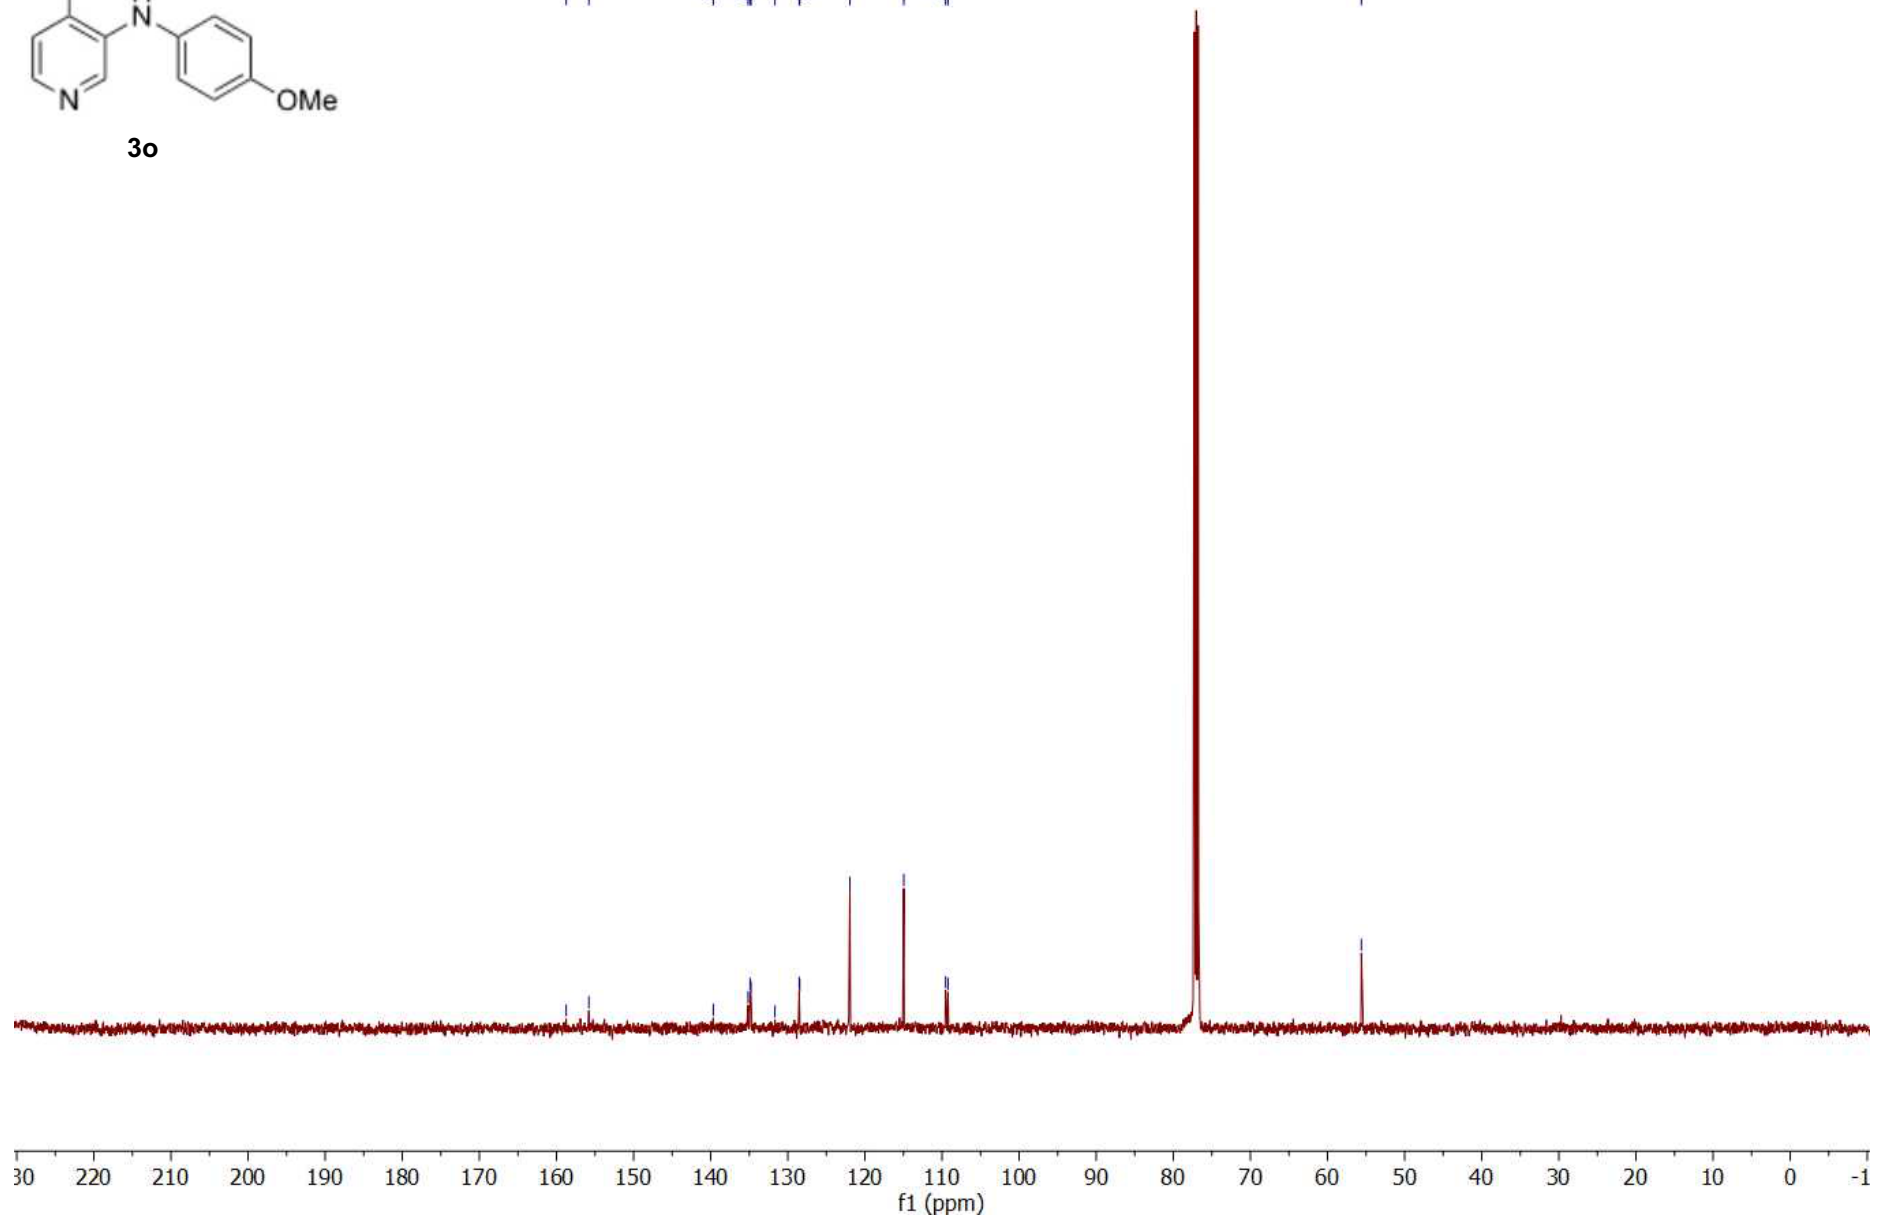



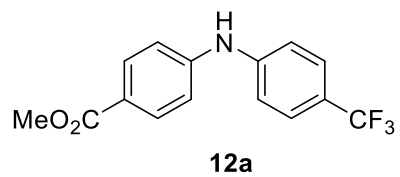

7.98  
7.97  
7.56  
7.54  
7.20  
7.18  
7.11  
7.09  
6.18  
3.90

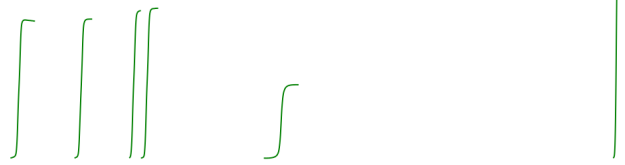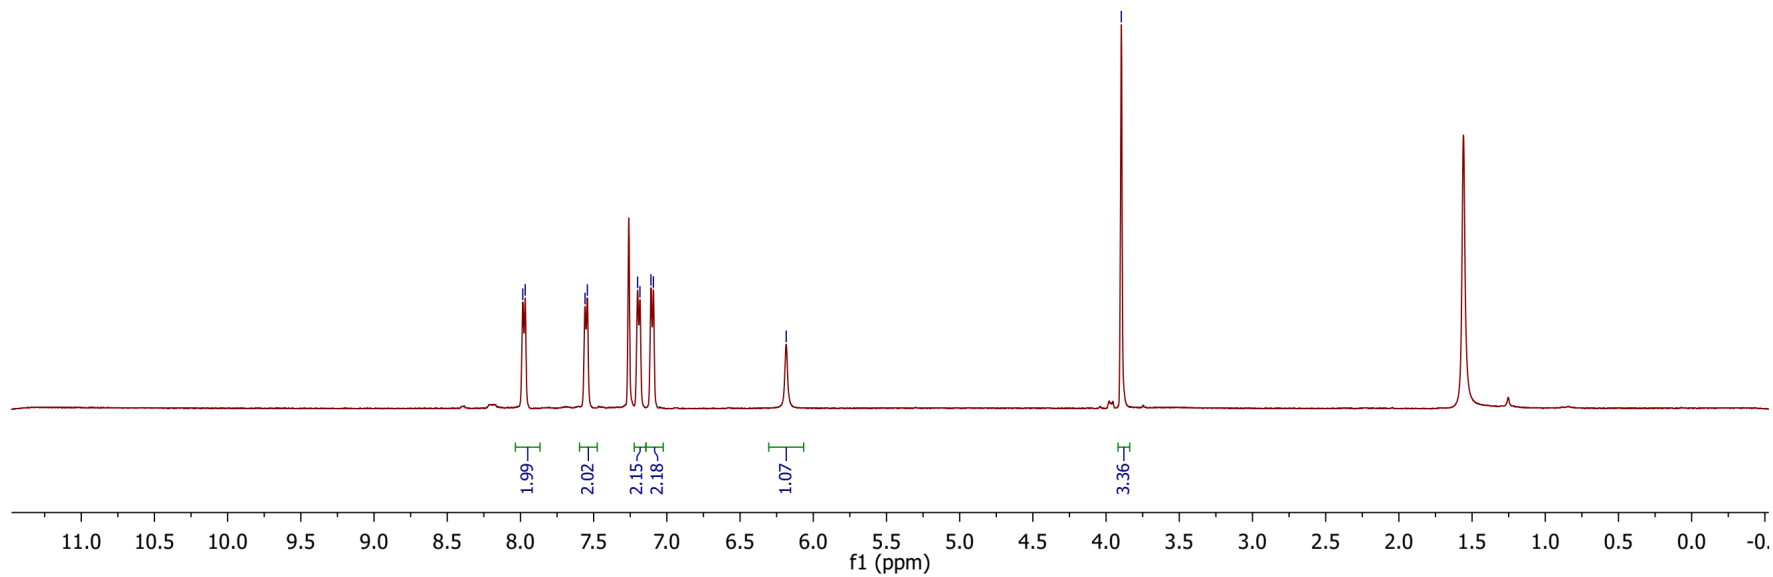

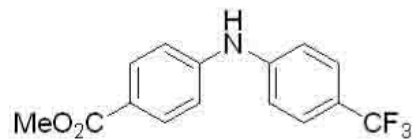

**12a**

—166.73

146.11  
144.54

131.53  
129.14  
126.83  
123.92  
122.99  
121.79  
117.90  
116.45

—51.91

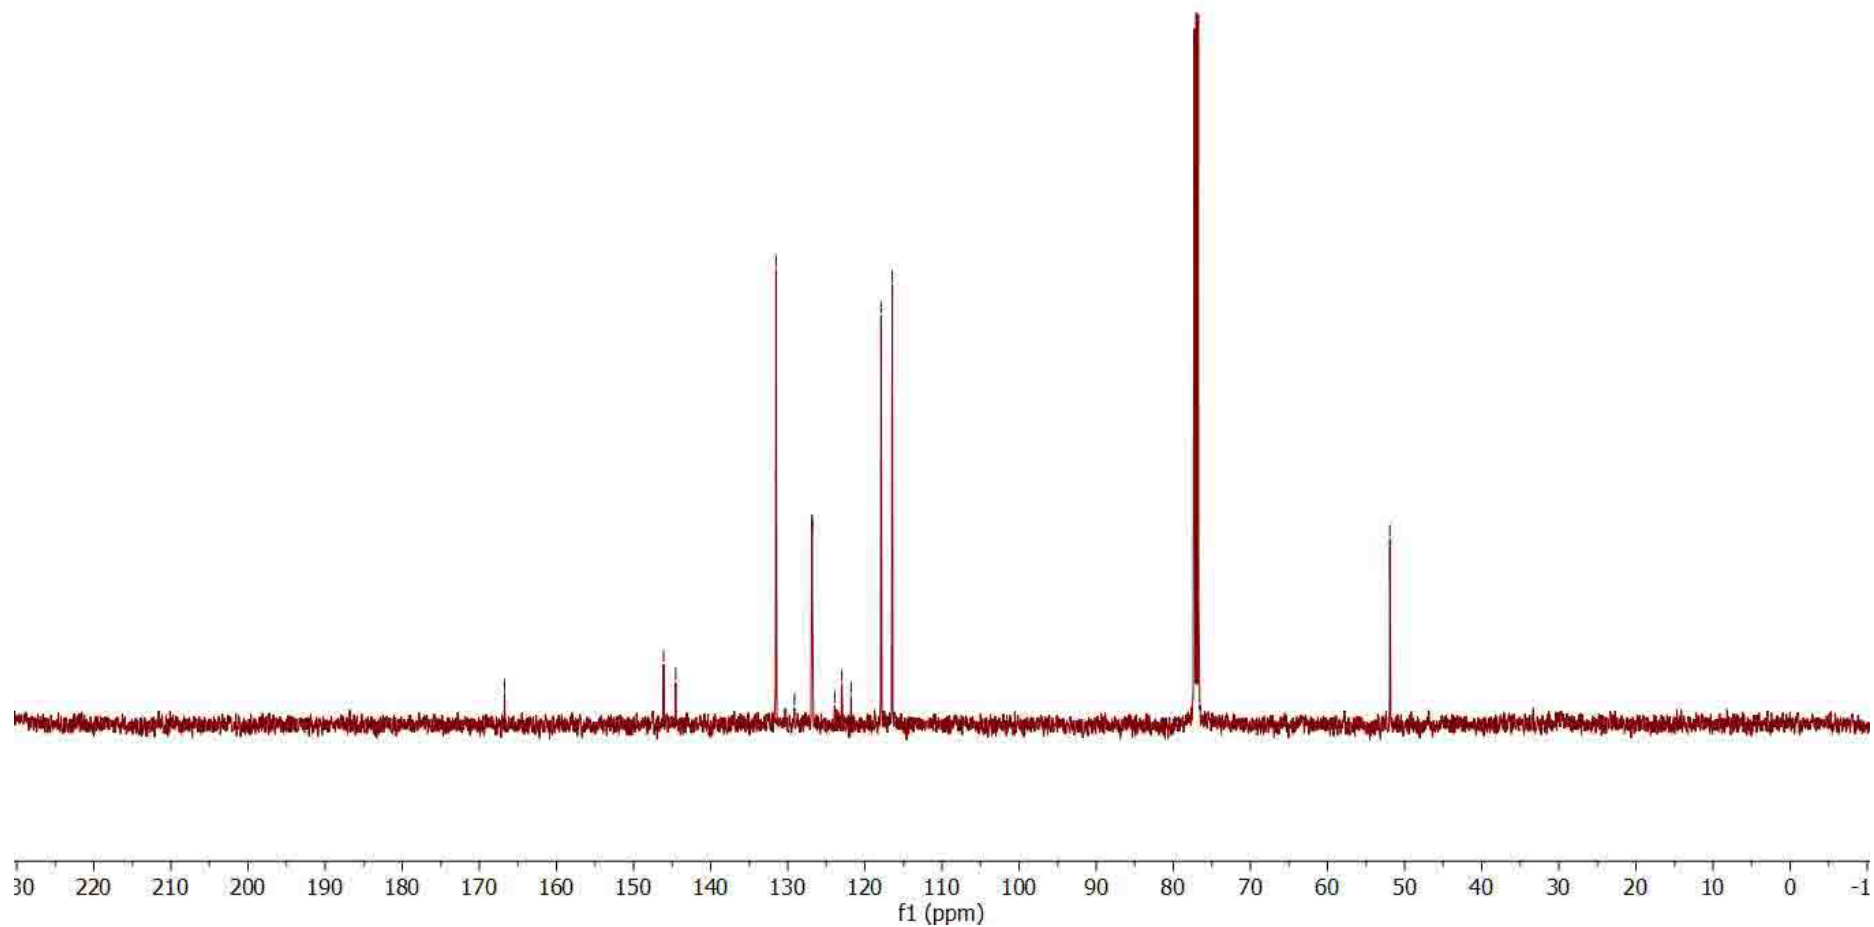

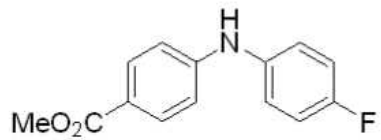

**12b**

7.91  
7.90  
7.89  
7.89  
7.16  
7.15  
7.14  
7.14  
7.13  
7.06  
7.06  
7.04  
7.03  
7.03  
6.88  
6.88  
6.87  
6.87  
6.86  
5.91  
3.87

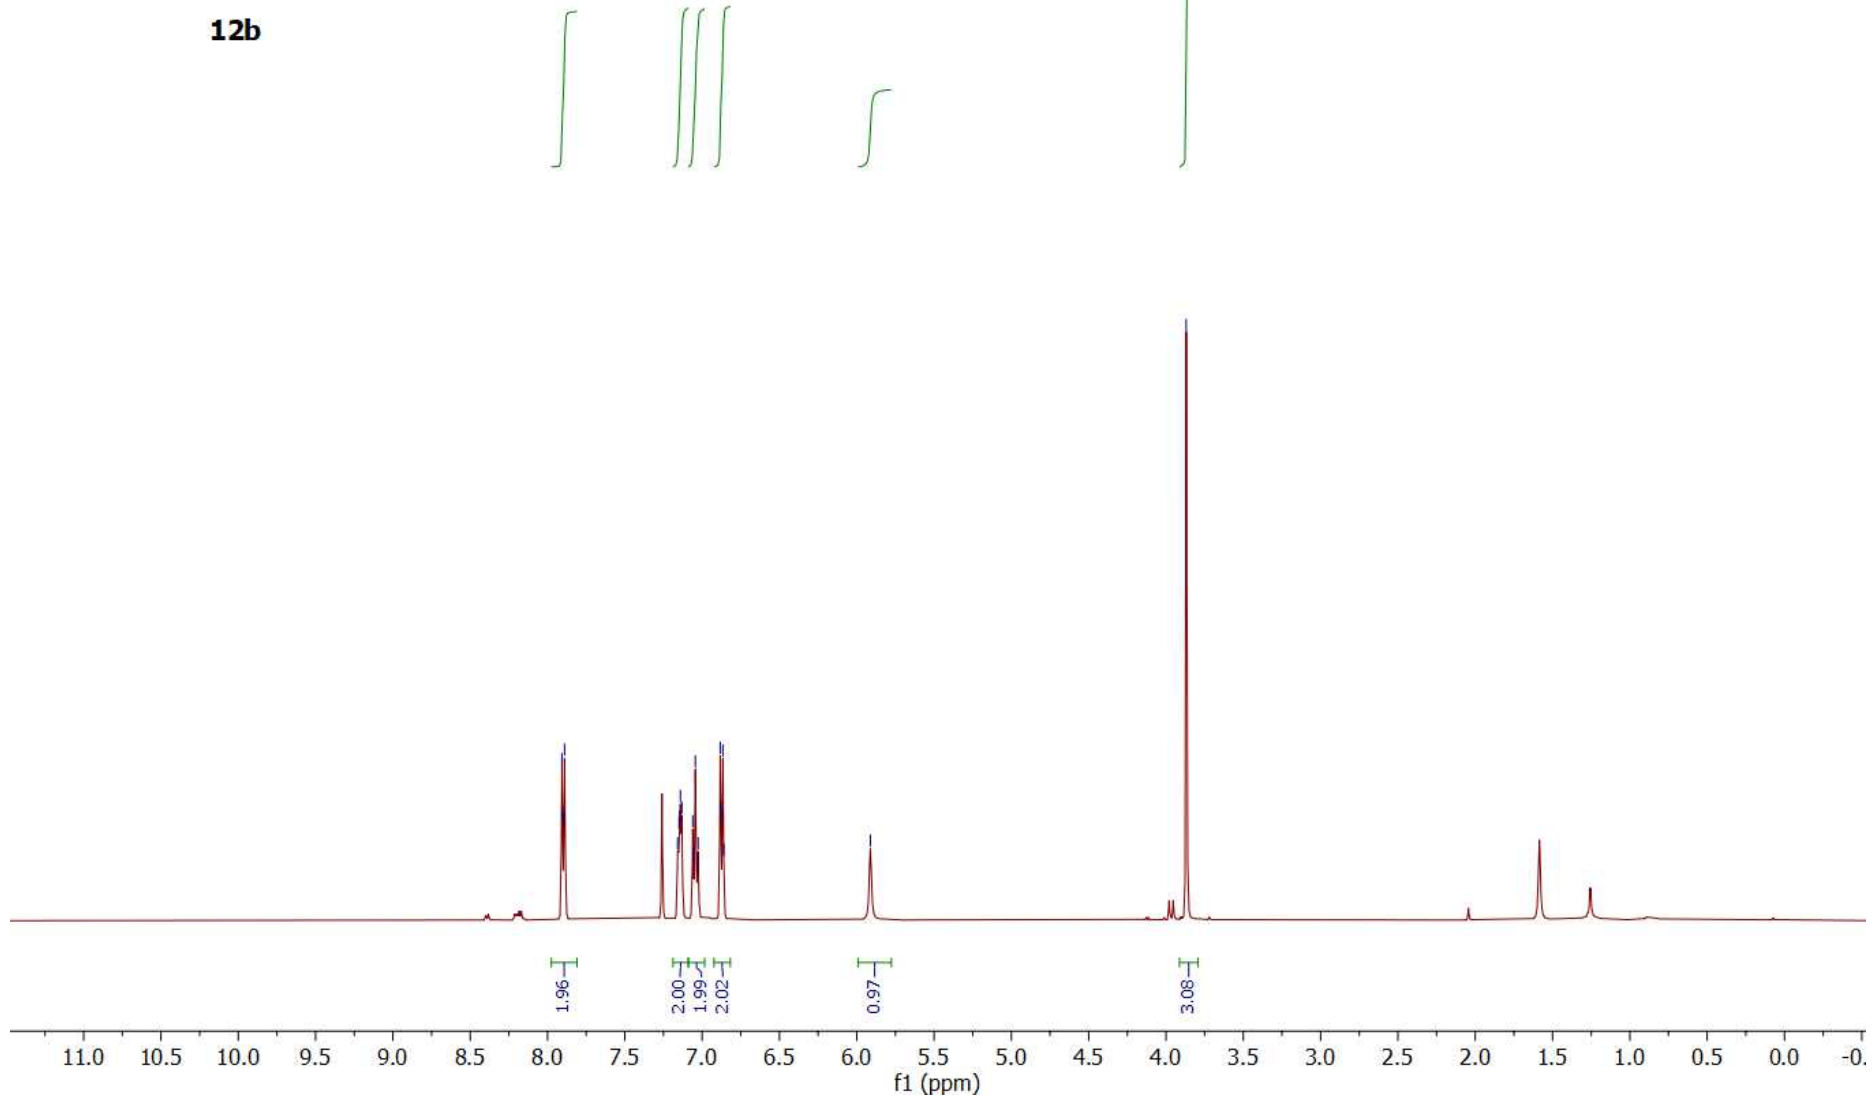



**12b**

—166.97  
—160.20  
—158.28  
—148.77  
—136.69  
—131.56  
123.44  
123.37  
120.94  
116.35  
116.18  
113.91  
—51.73

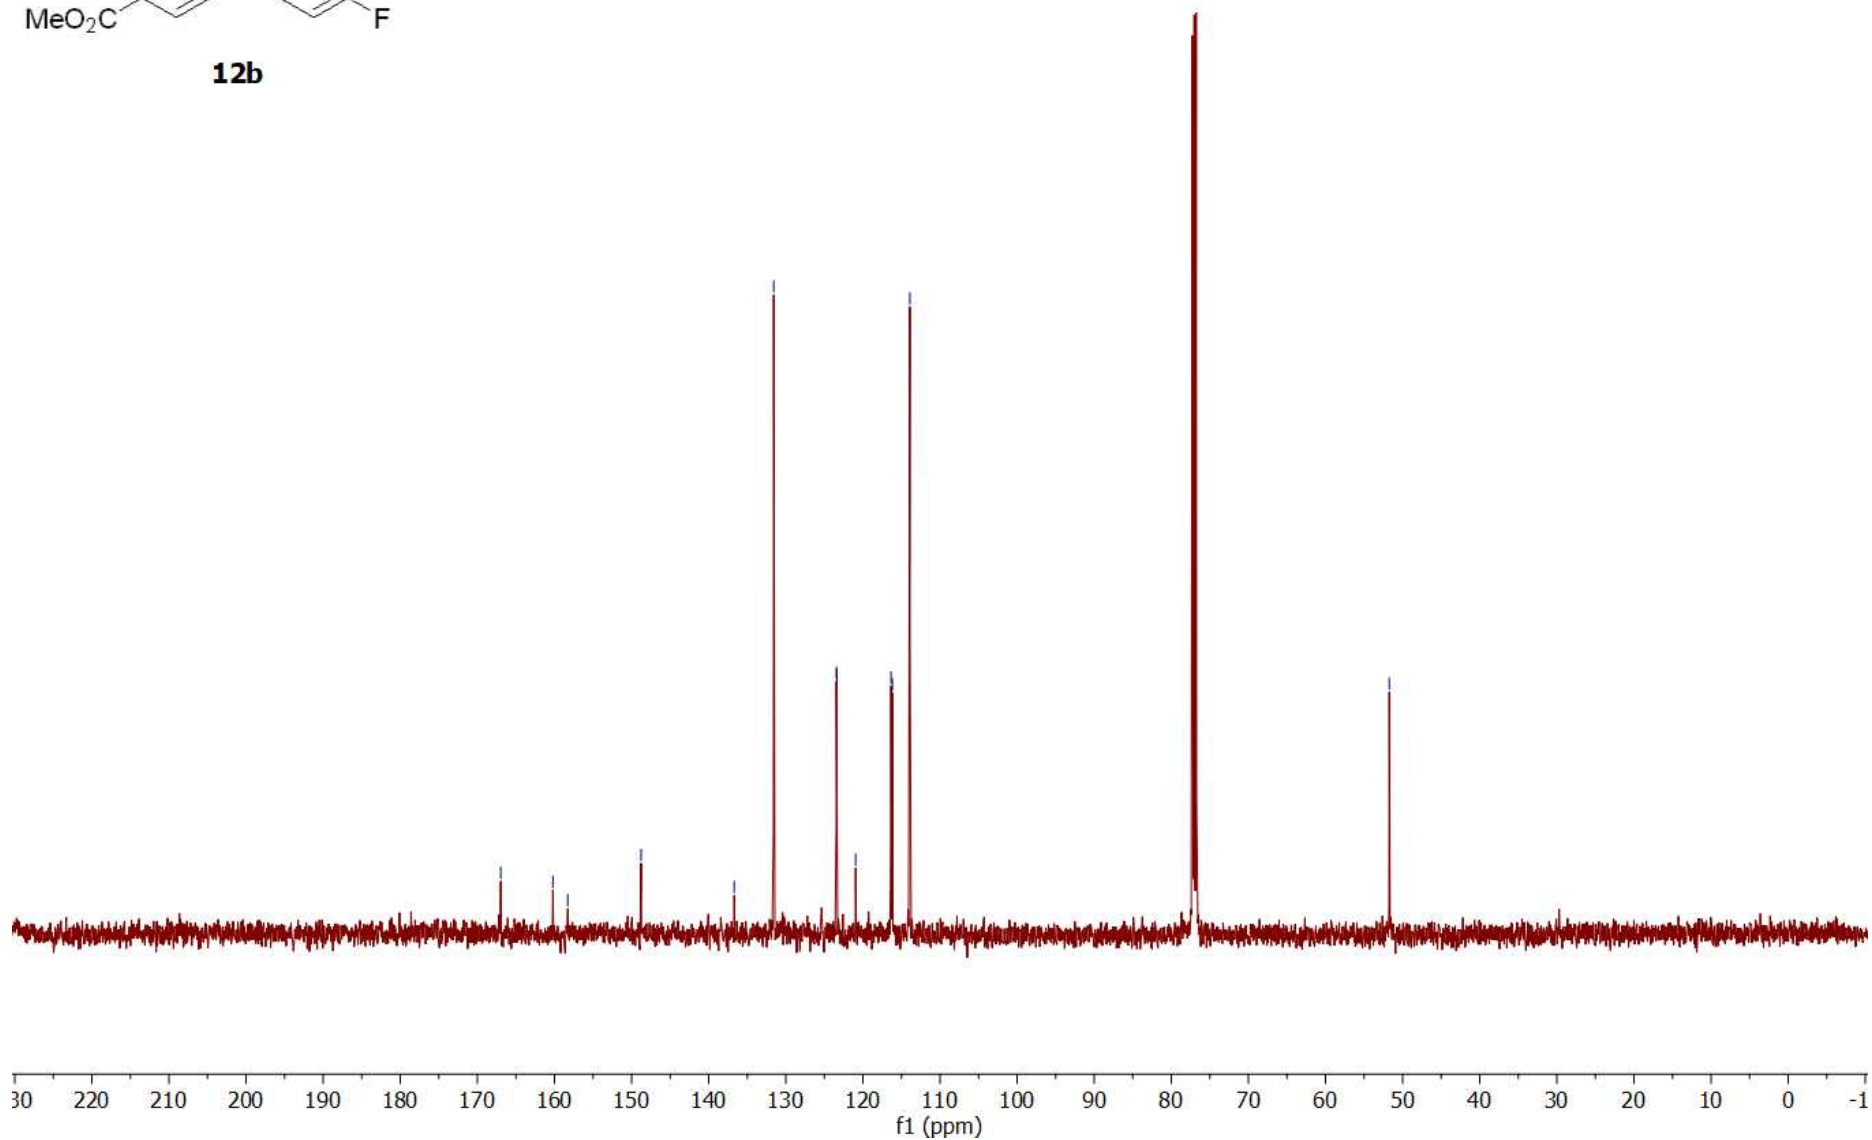

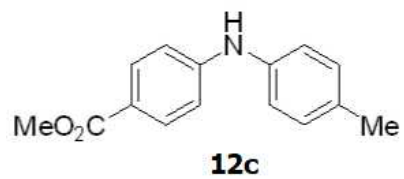

7.91  
7.90  
7.89  
7.89  
7.16  
7.14  
7.09  
7.09  
7.08  
7.08  
7.07  
6.93  
6.92  
6.91  
6.01

3.87

2.34

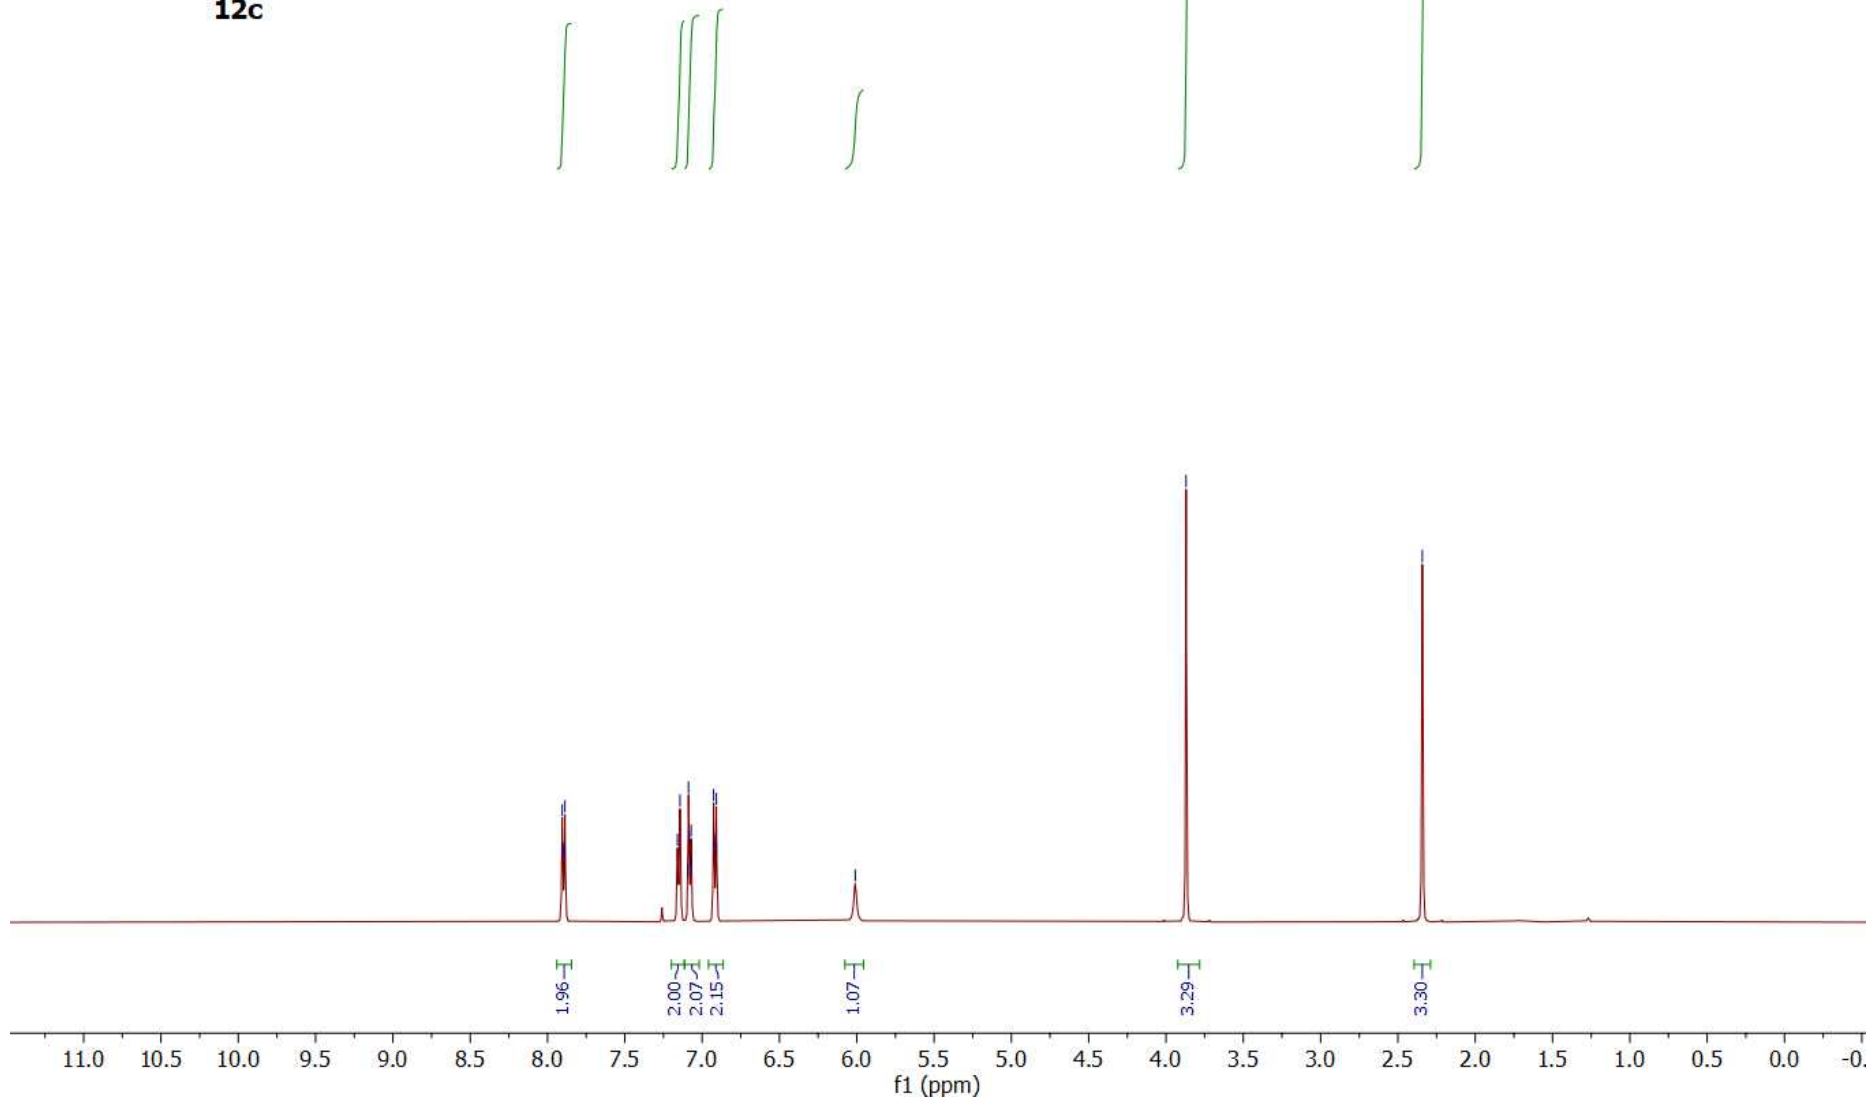



—167.09

—148.86

—138.08

—133.18

—131.51

—130.06

—121.39

—120.50

—113.98

—51.70

—20.85

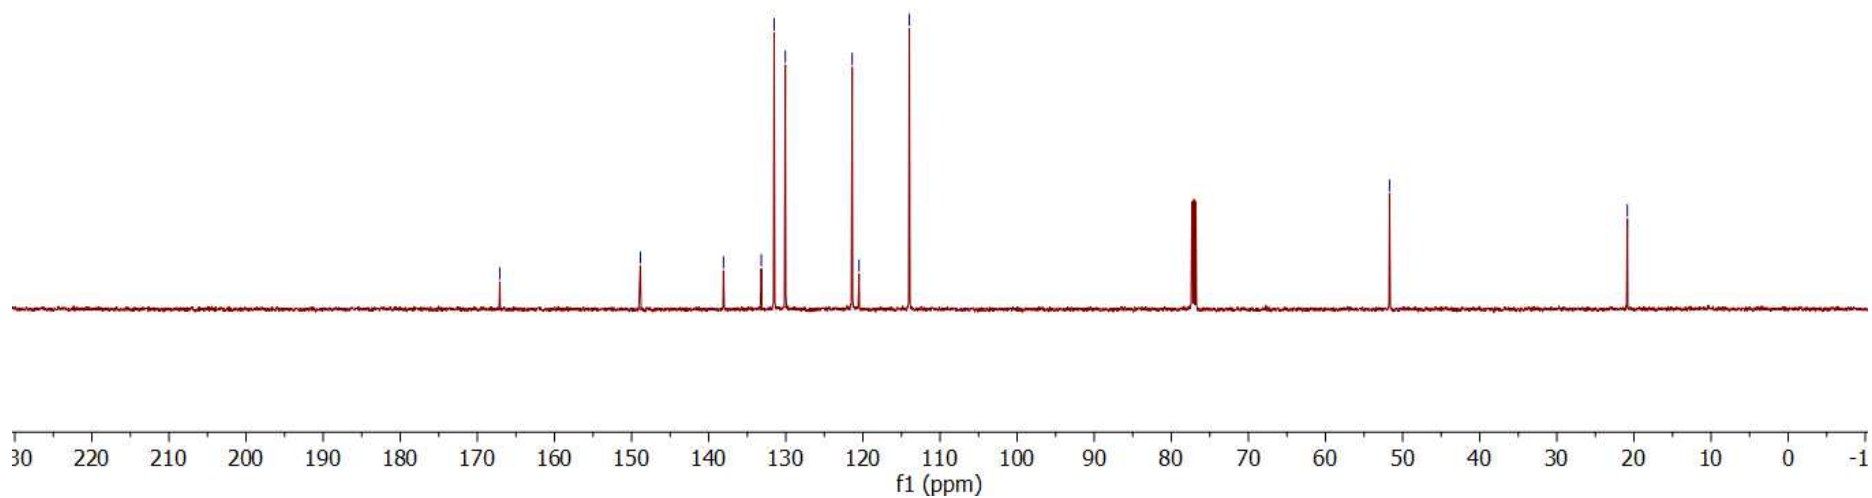

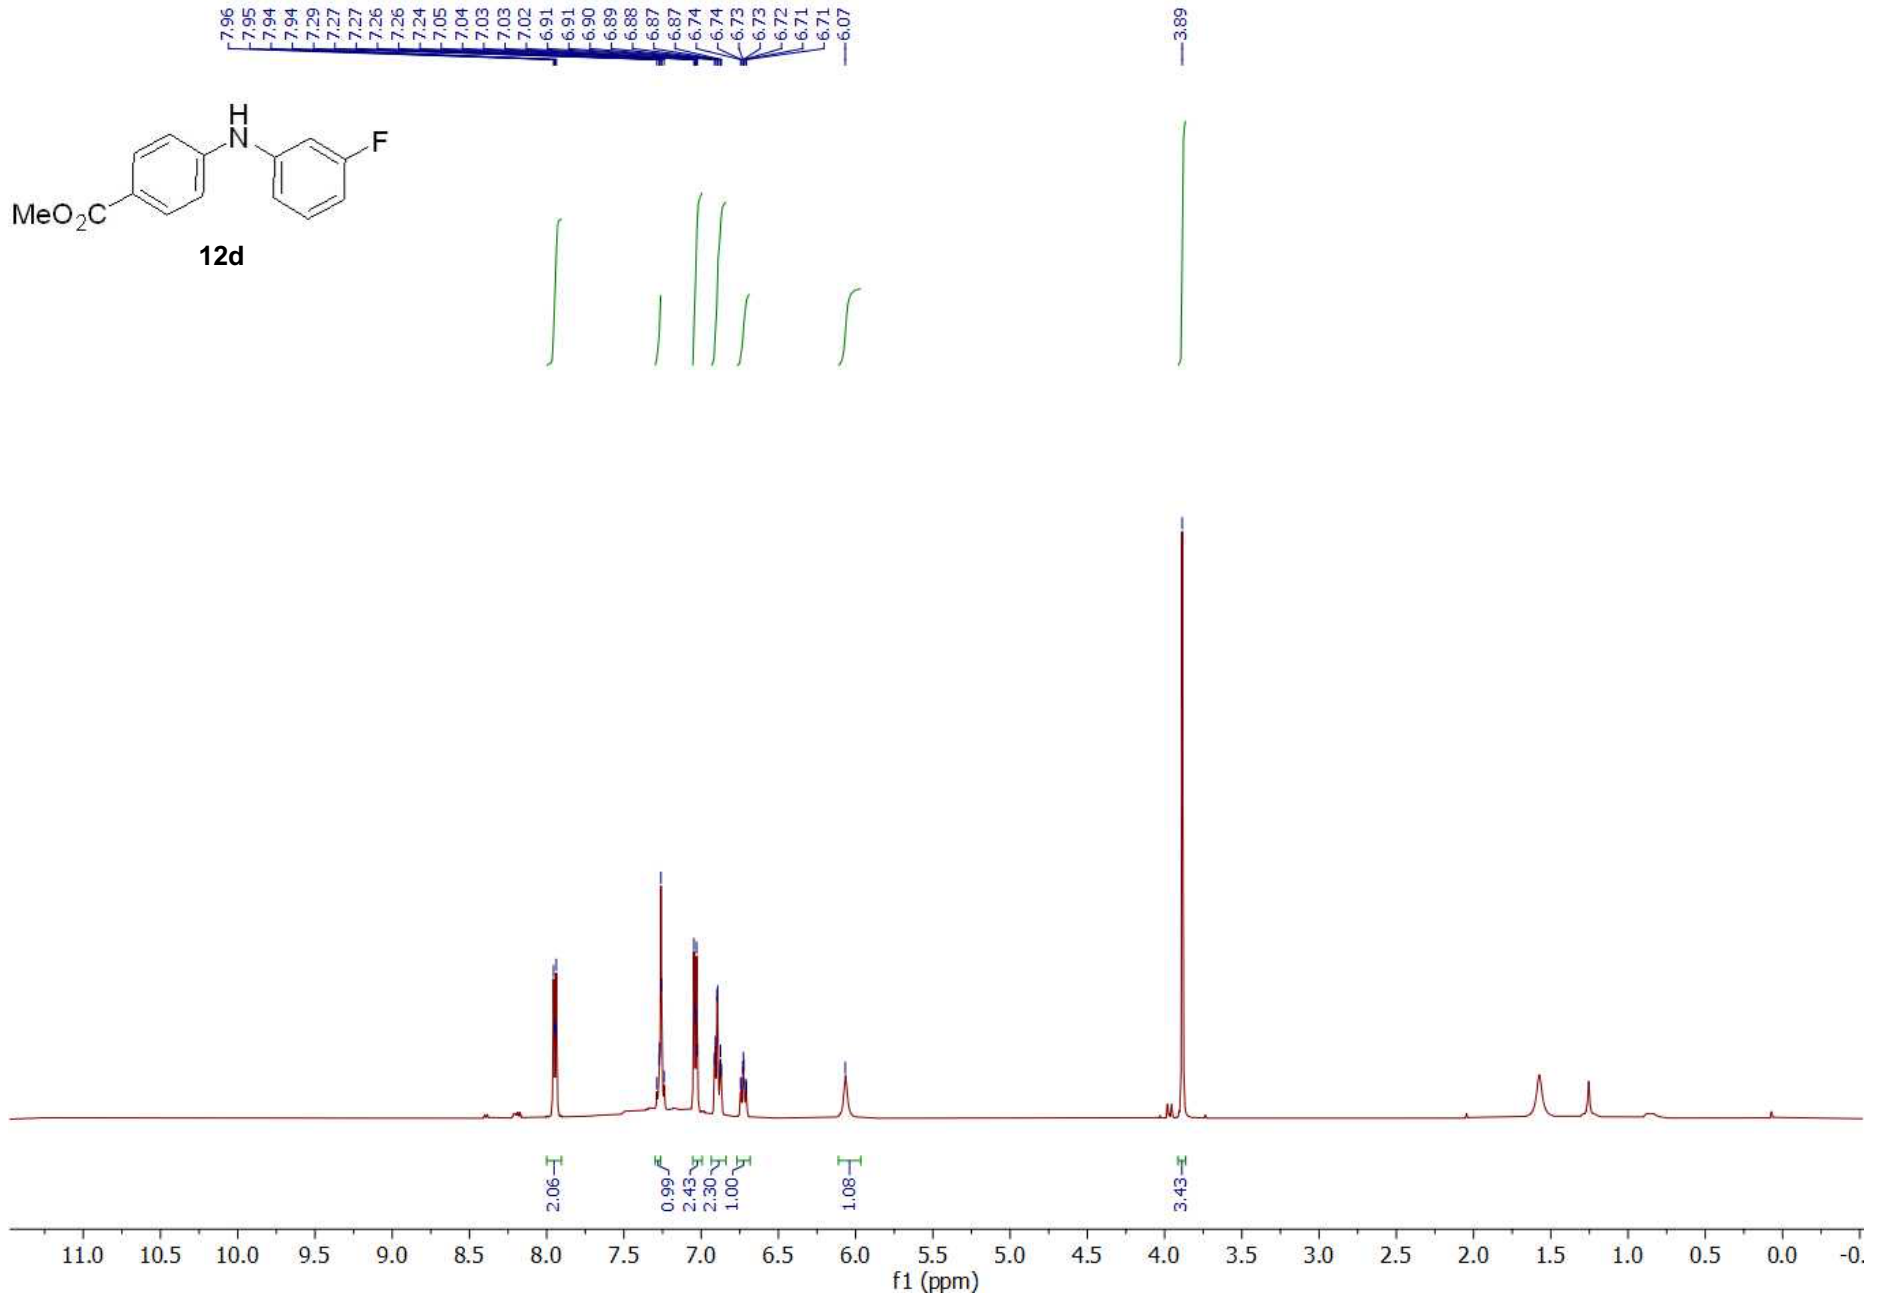

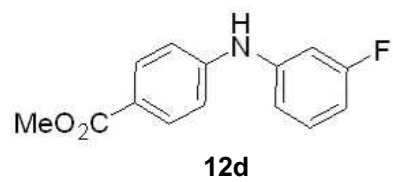

166.83  
164.59  
162.64  
146.93  
142.95  
131.52  
130.74  
130.66  
122.17  
115.55  
115.01  
109.42  
109.25  
106.47  
106.28  
51.84

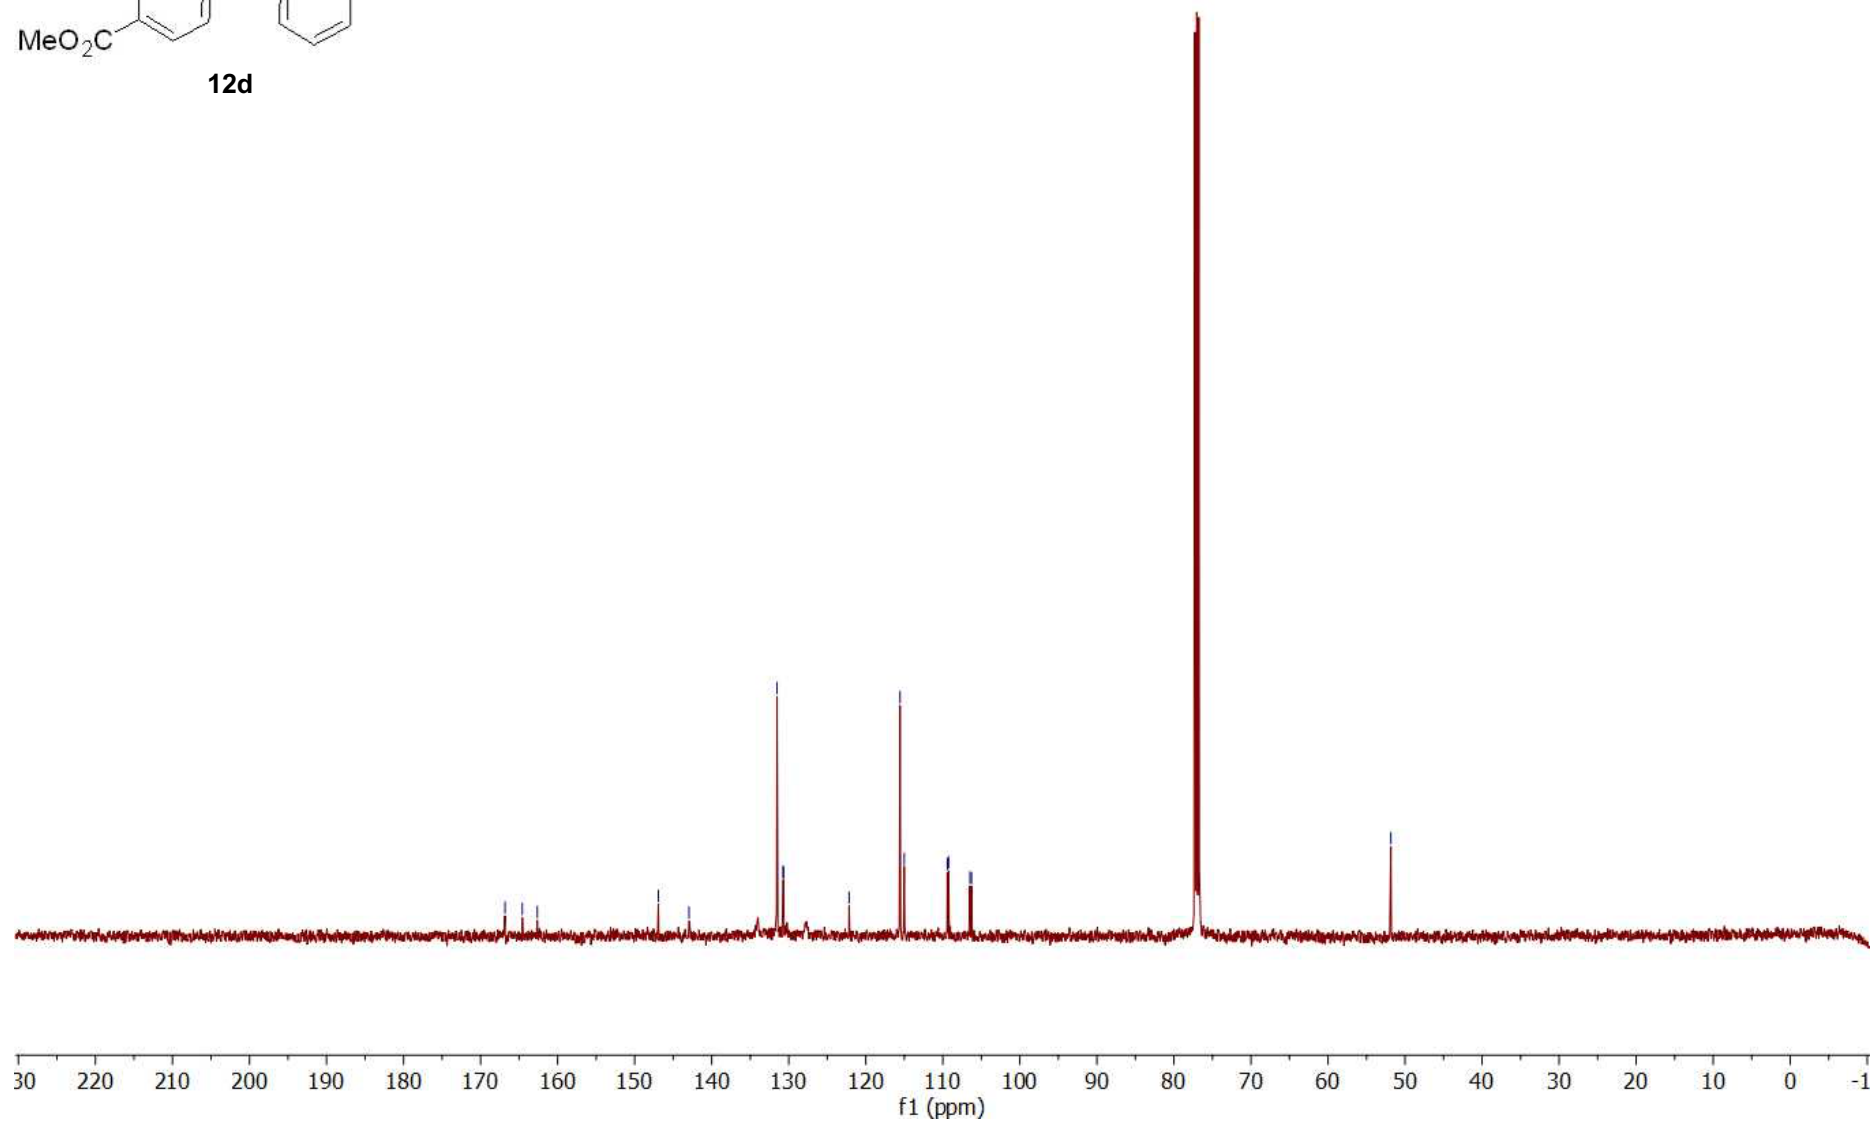



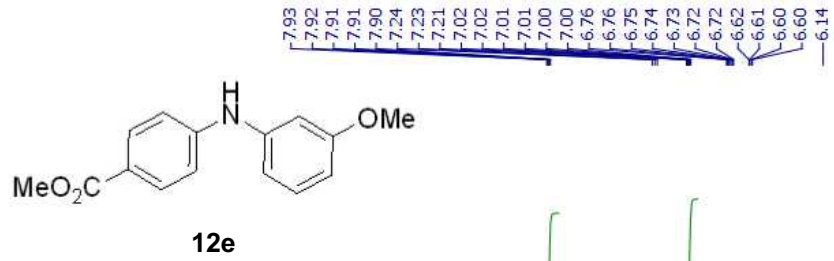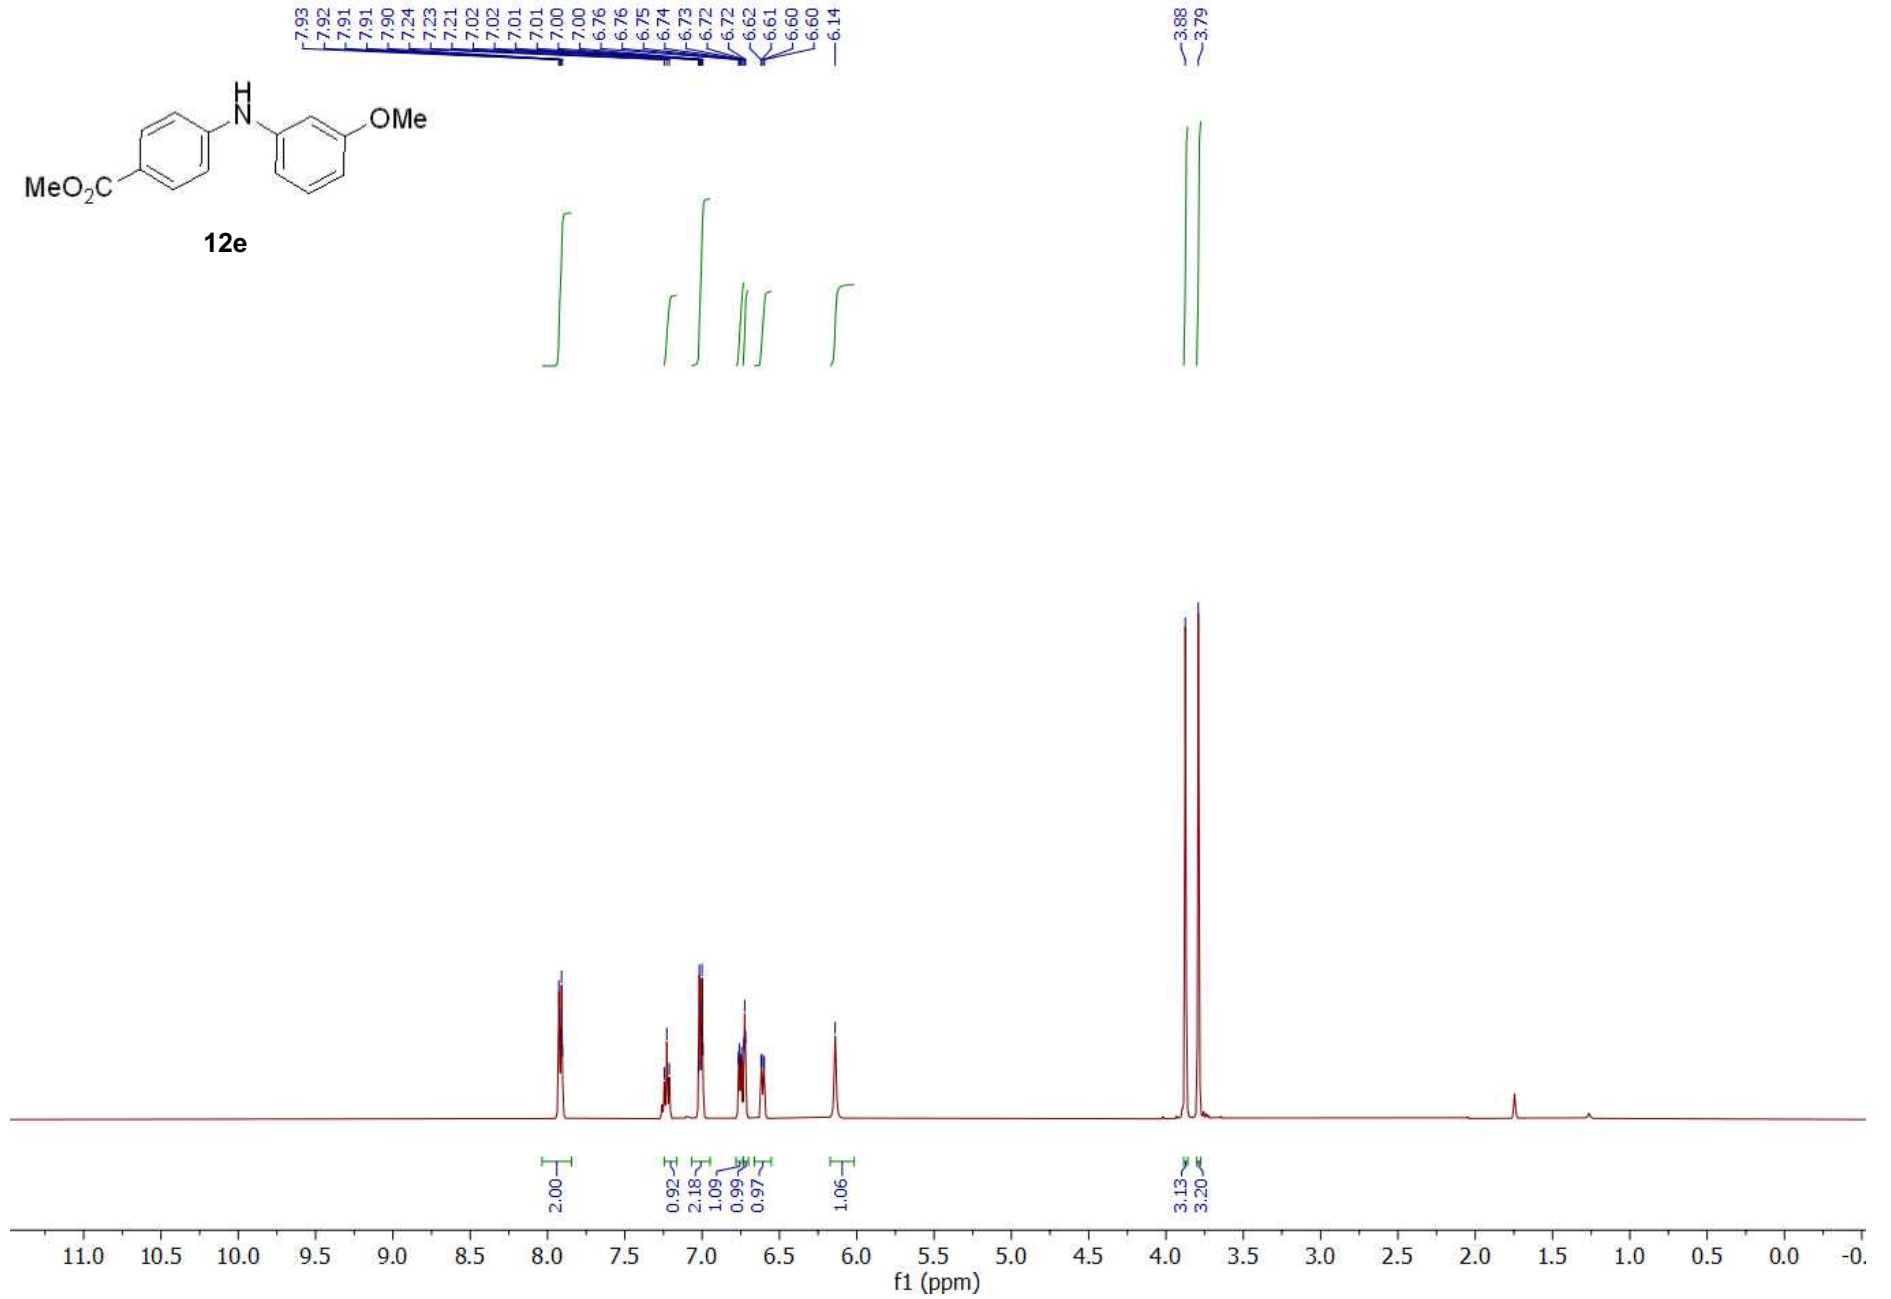

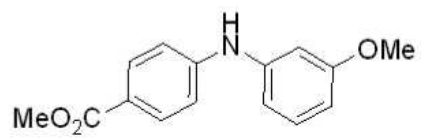

12e

167.02  
160.70  
147.88  
142.26  
131.48  
130.27  
121.23  
115.00  
112.60  
108.28  
106.00  
55.30  
51.77

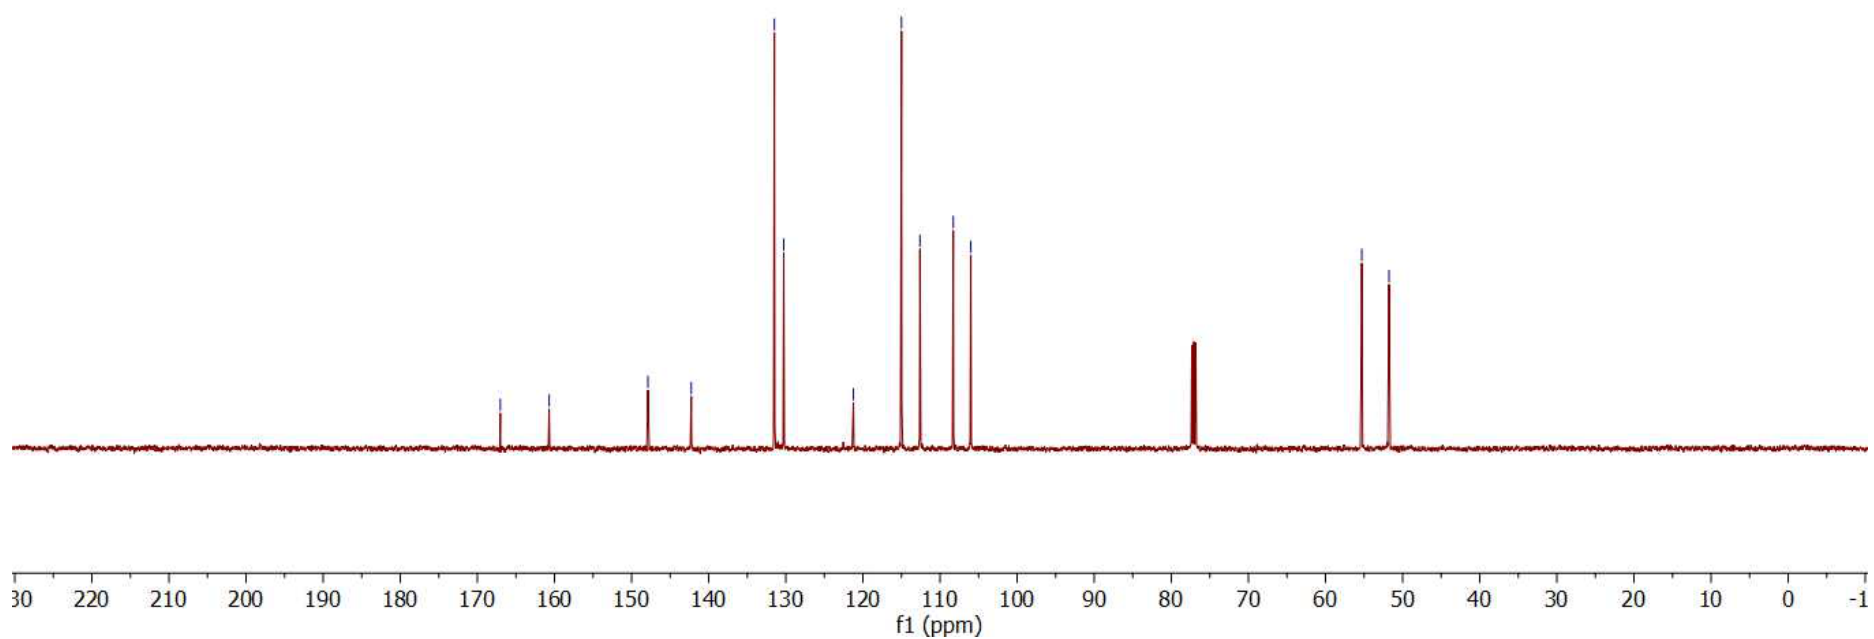

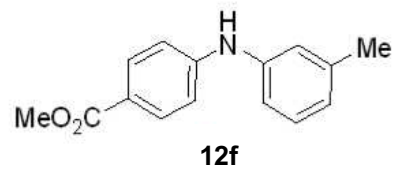

7.92  
7.92  
7.90  
7.24  
7.22  
7.21  
6.99  
6.98  
6.98  
6.97  
6.90  
6.88  
5.97

3.87

2.34

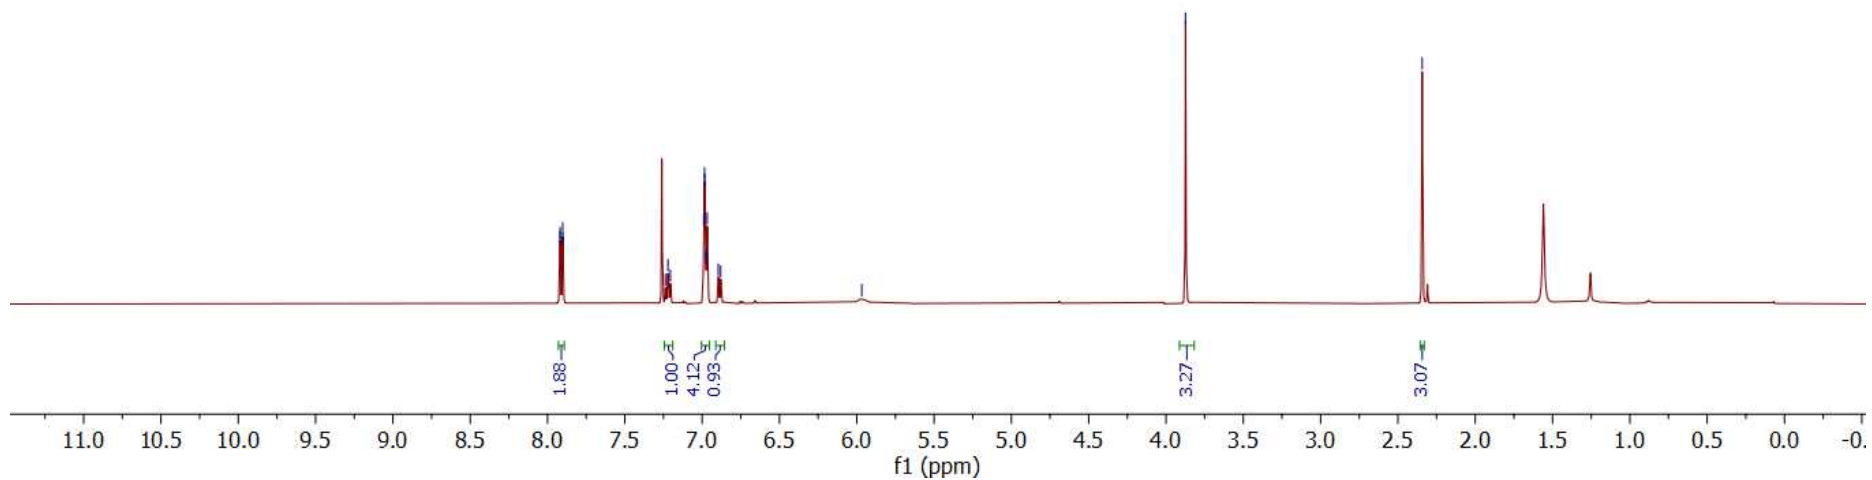

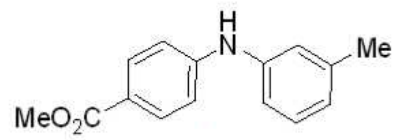

12f

—167.00

—148.20

—140.76

—139.49

—131.49

—129.34

—124.03

—121.17

—117.56

—114.59

—51.73

—21.49

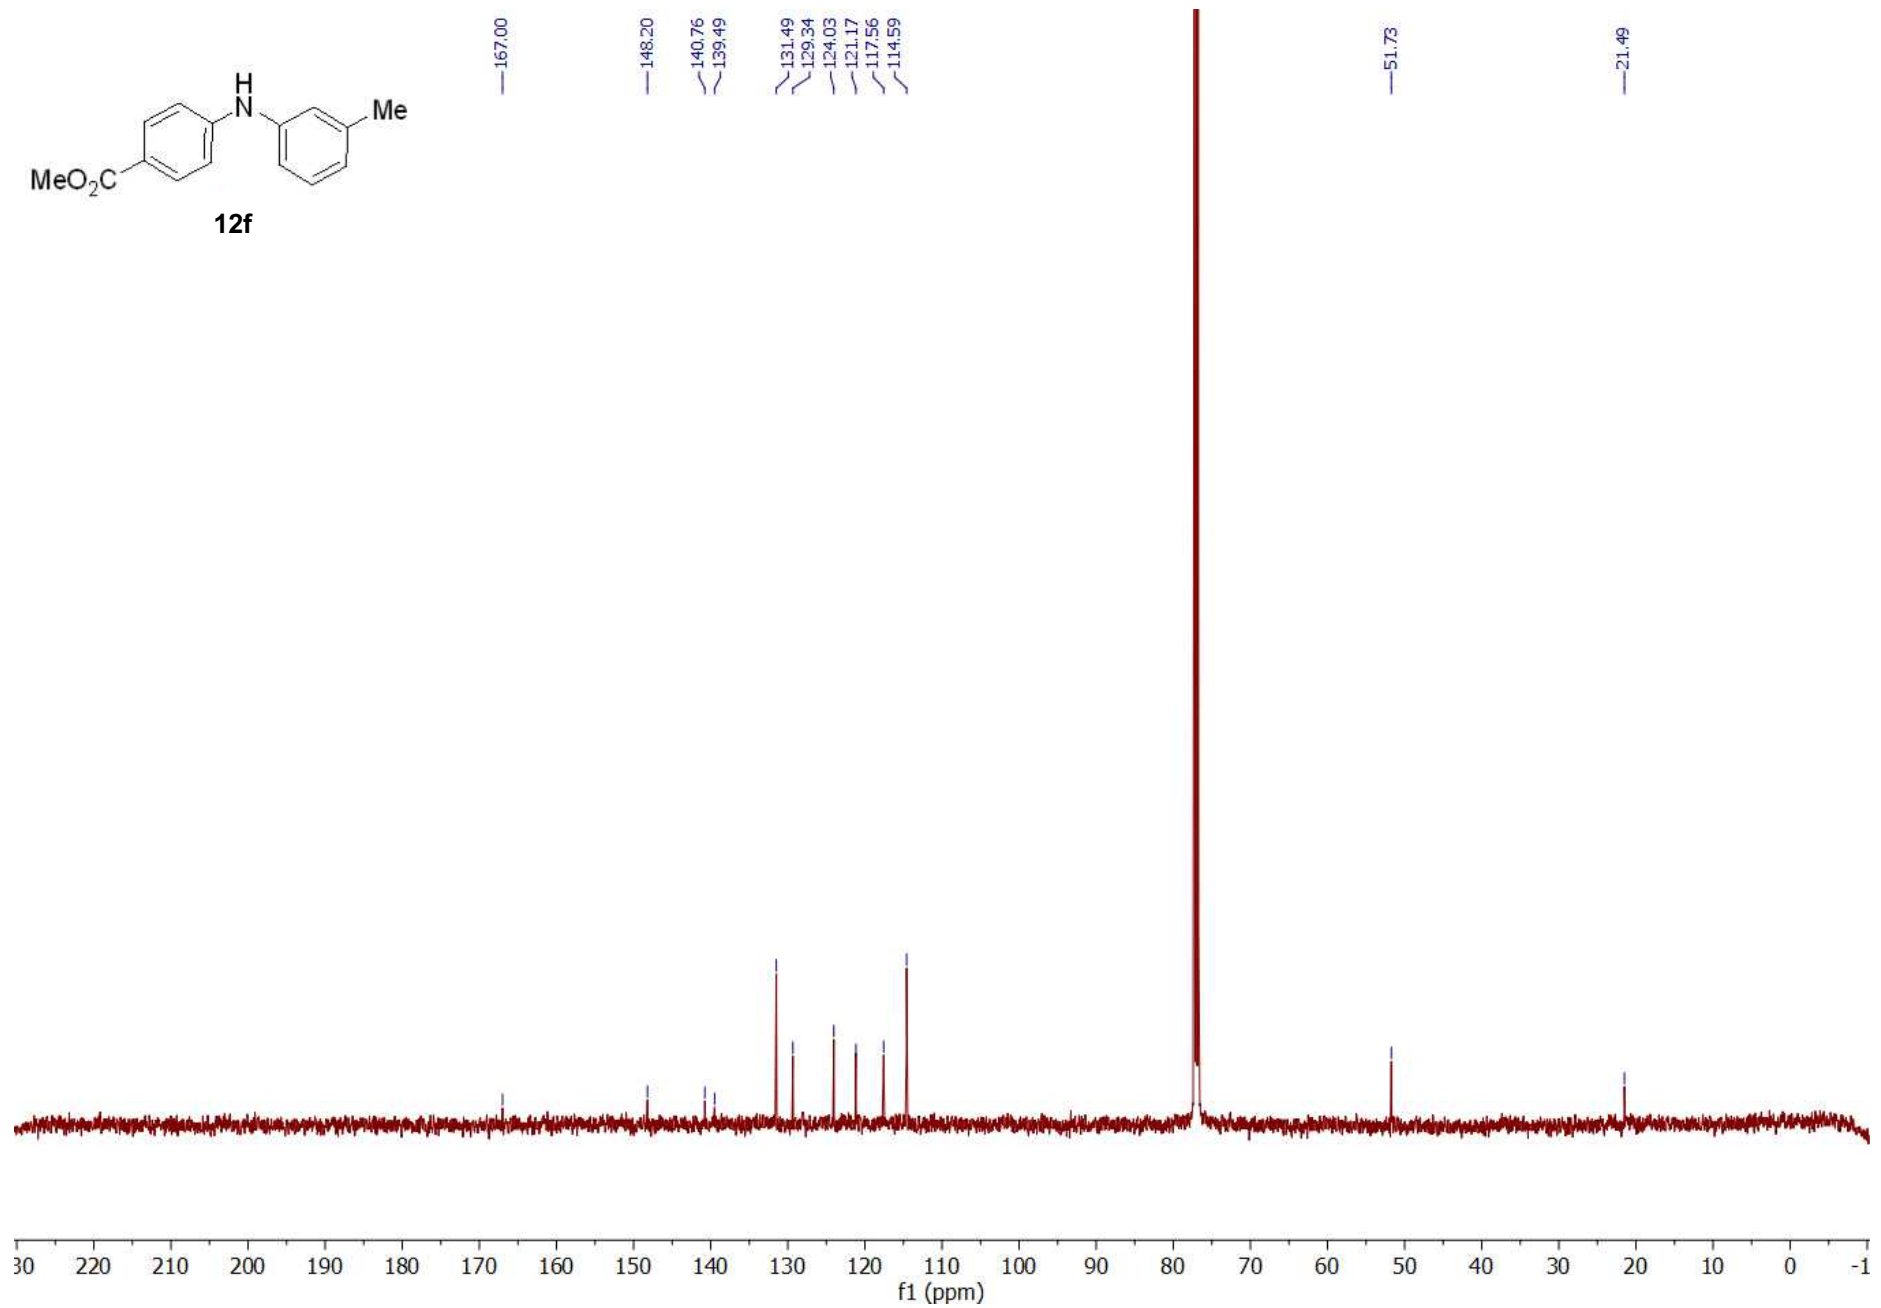

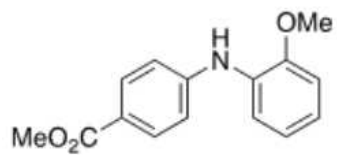

12g

7.94  
7.94  
7.93  
7.92  
7.91  
7.41  
7.41  
7.40  
7.40  
7.09  
7.08  
7.08  
7.07  
7.07  
6.99  
6.98  
6.97  
6.96  
6.95  
6.94  
6.94  
6.94  
6.93  
6.93  
6.92  
6.92  
6.37

3.89  
3.88

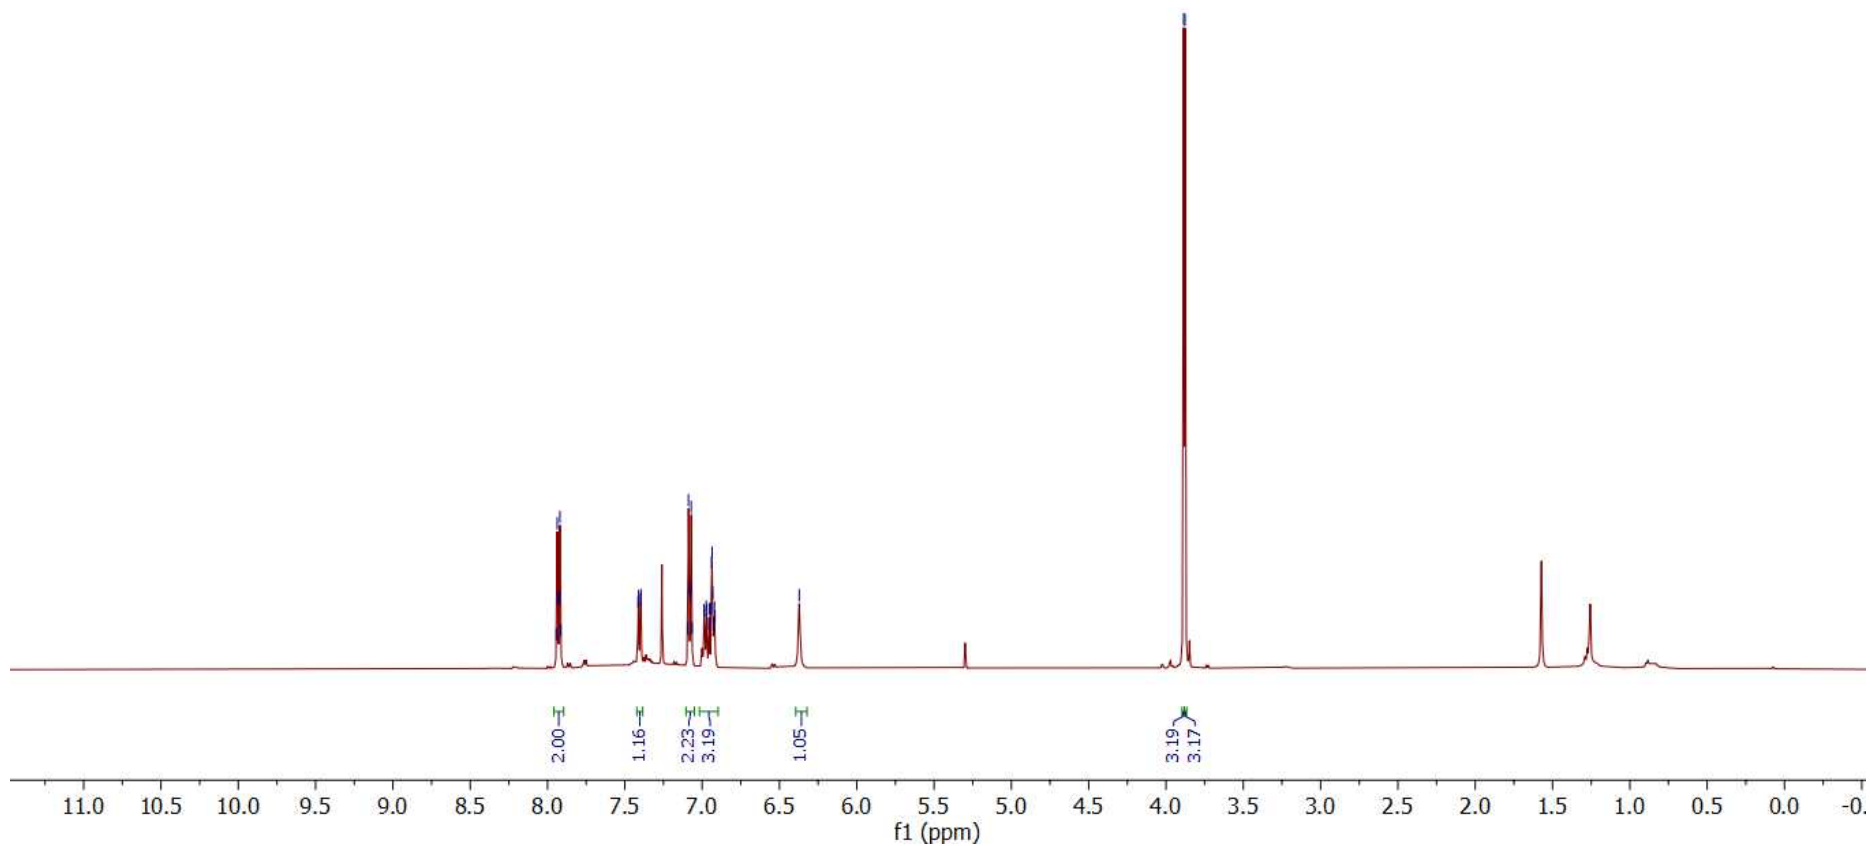



12g

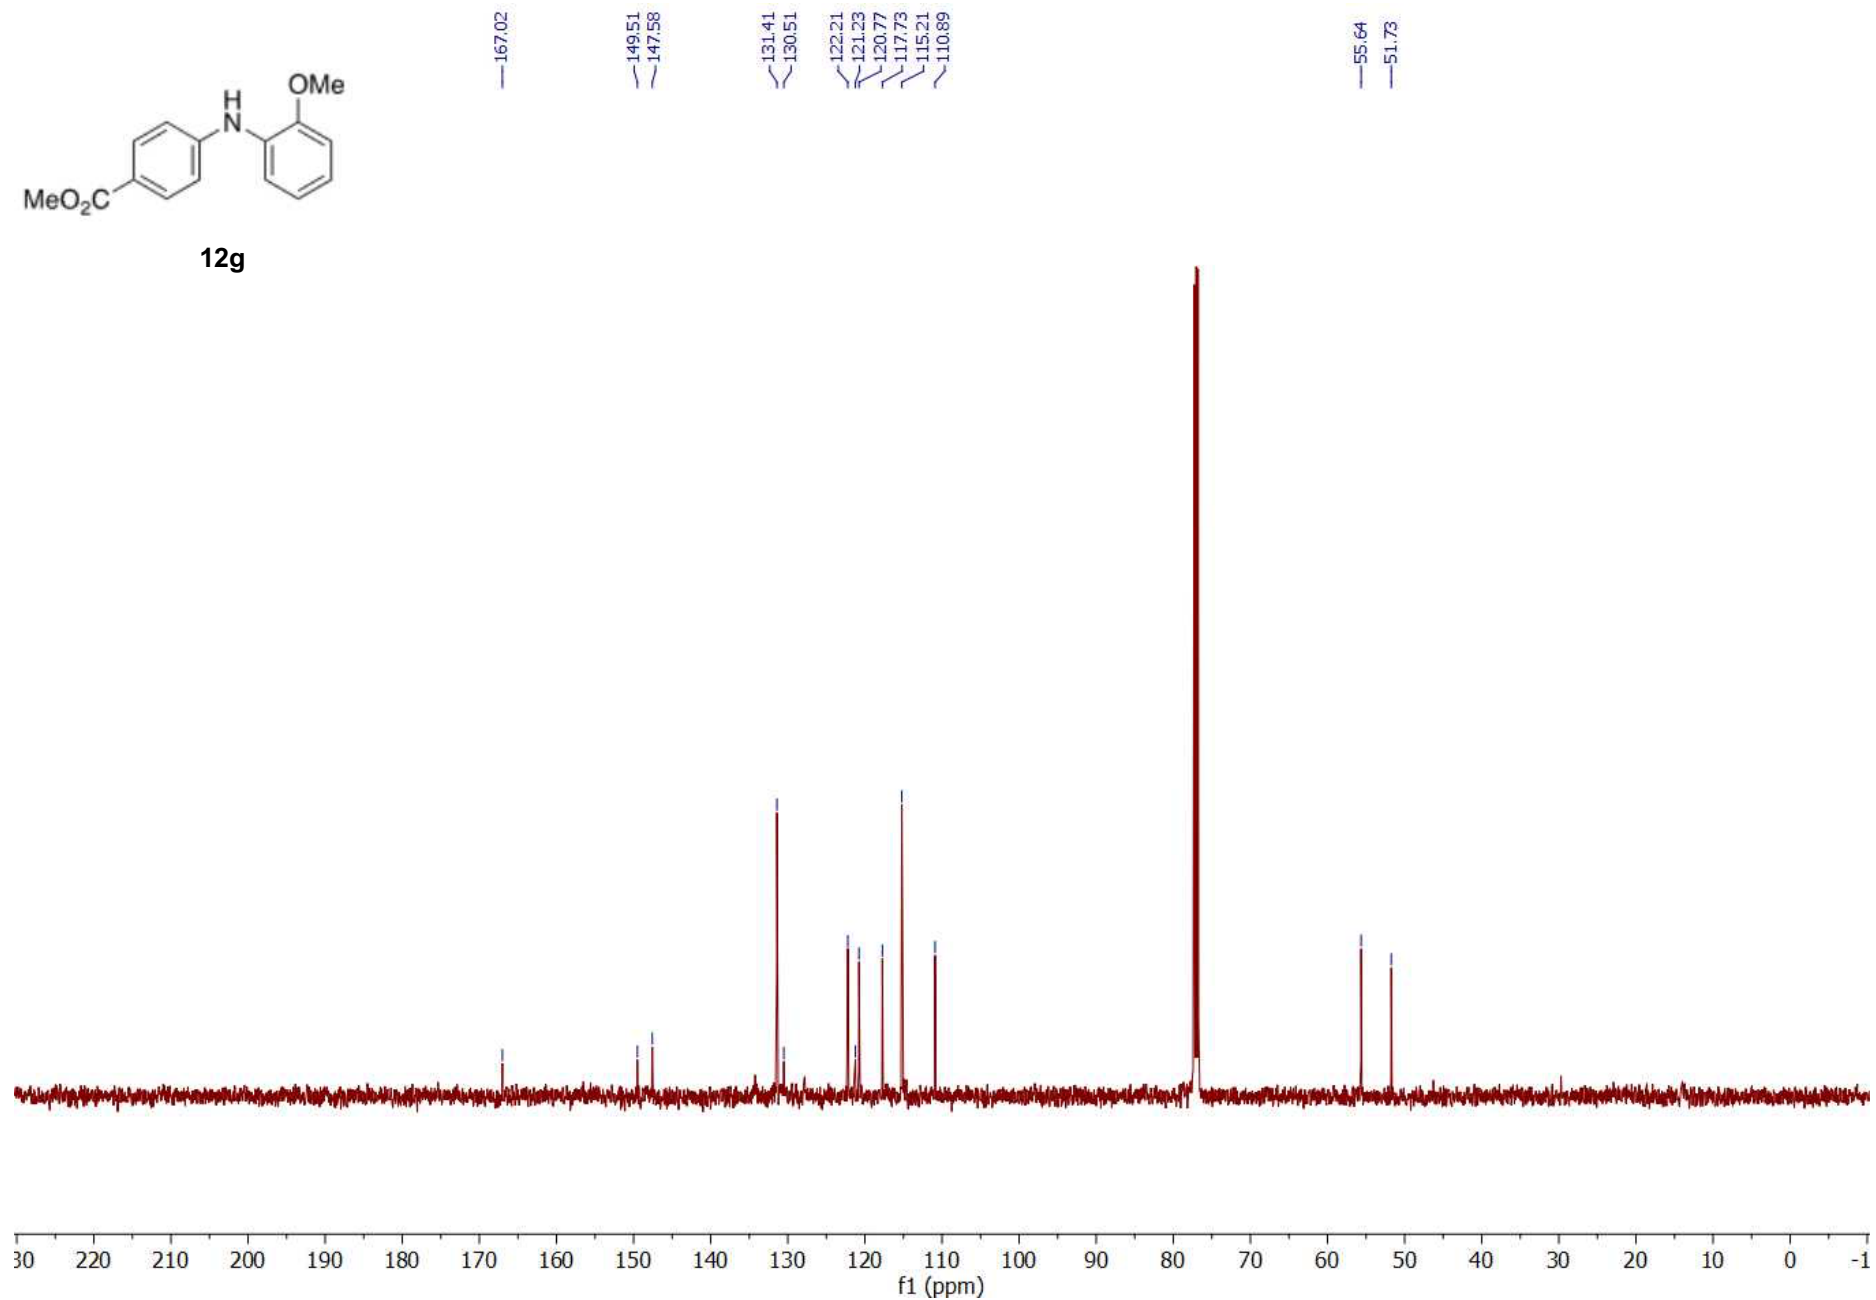

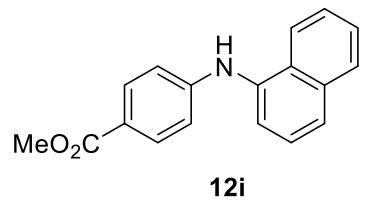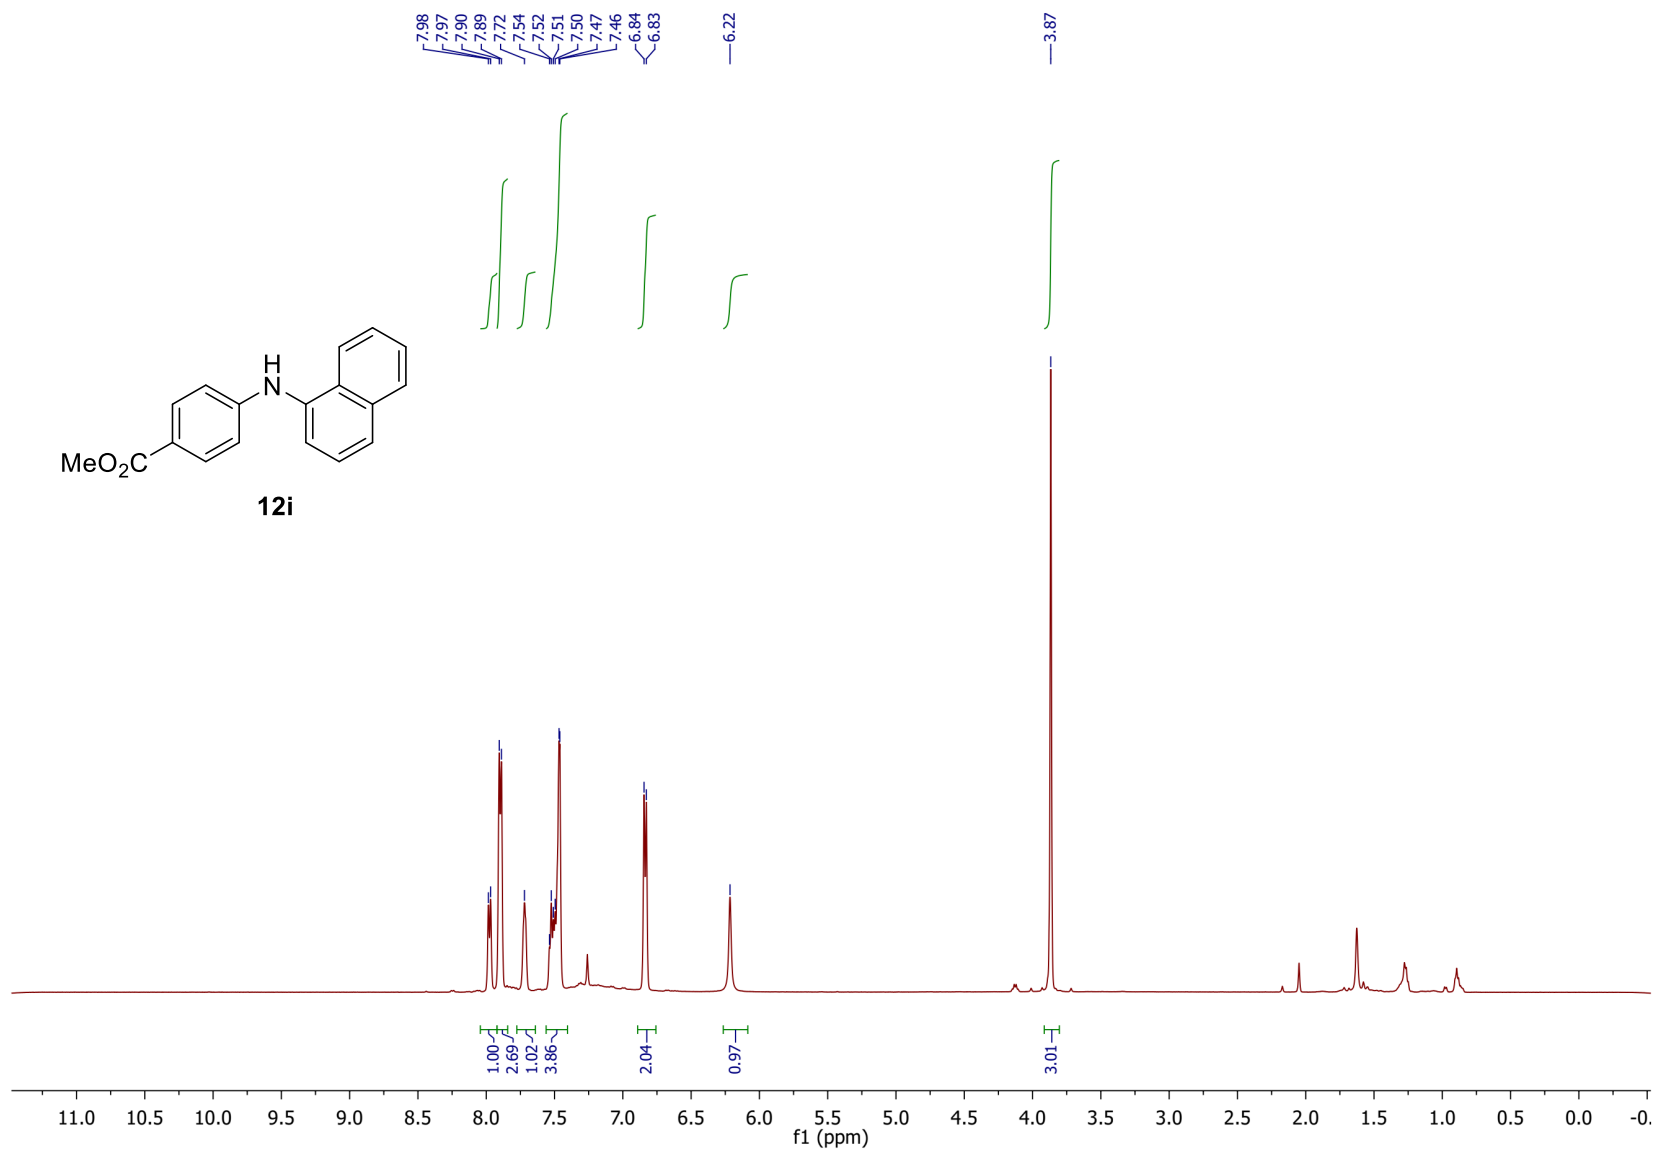

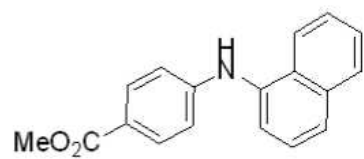

12i

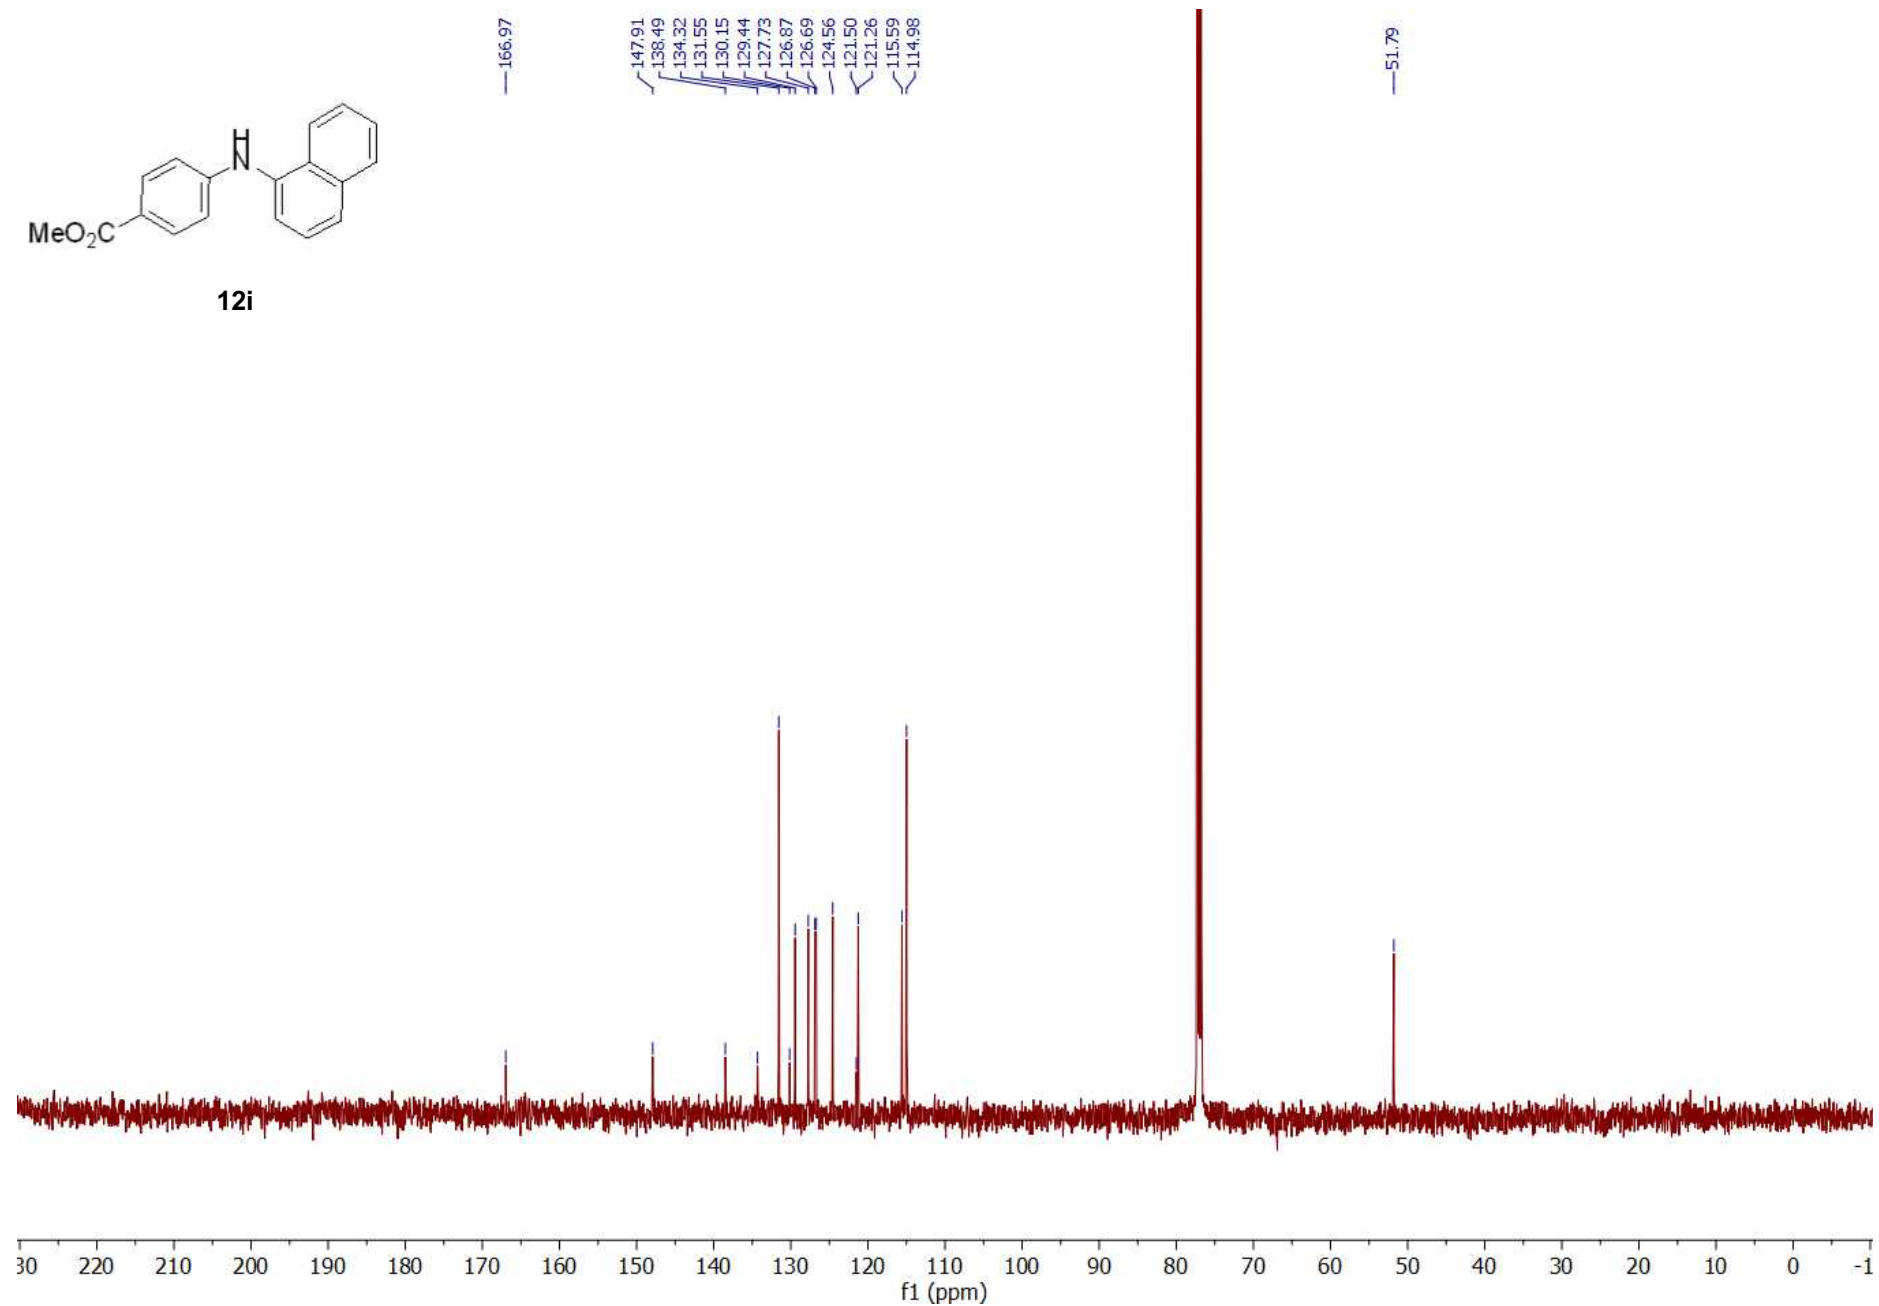



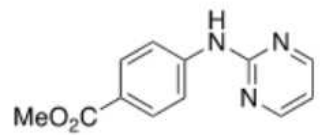

12j

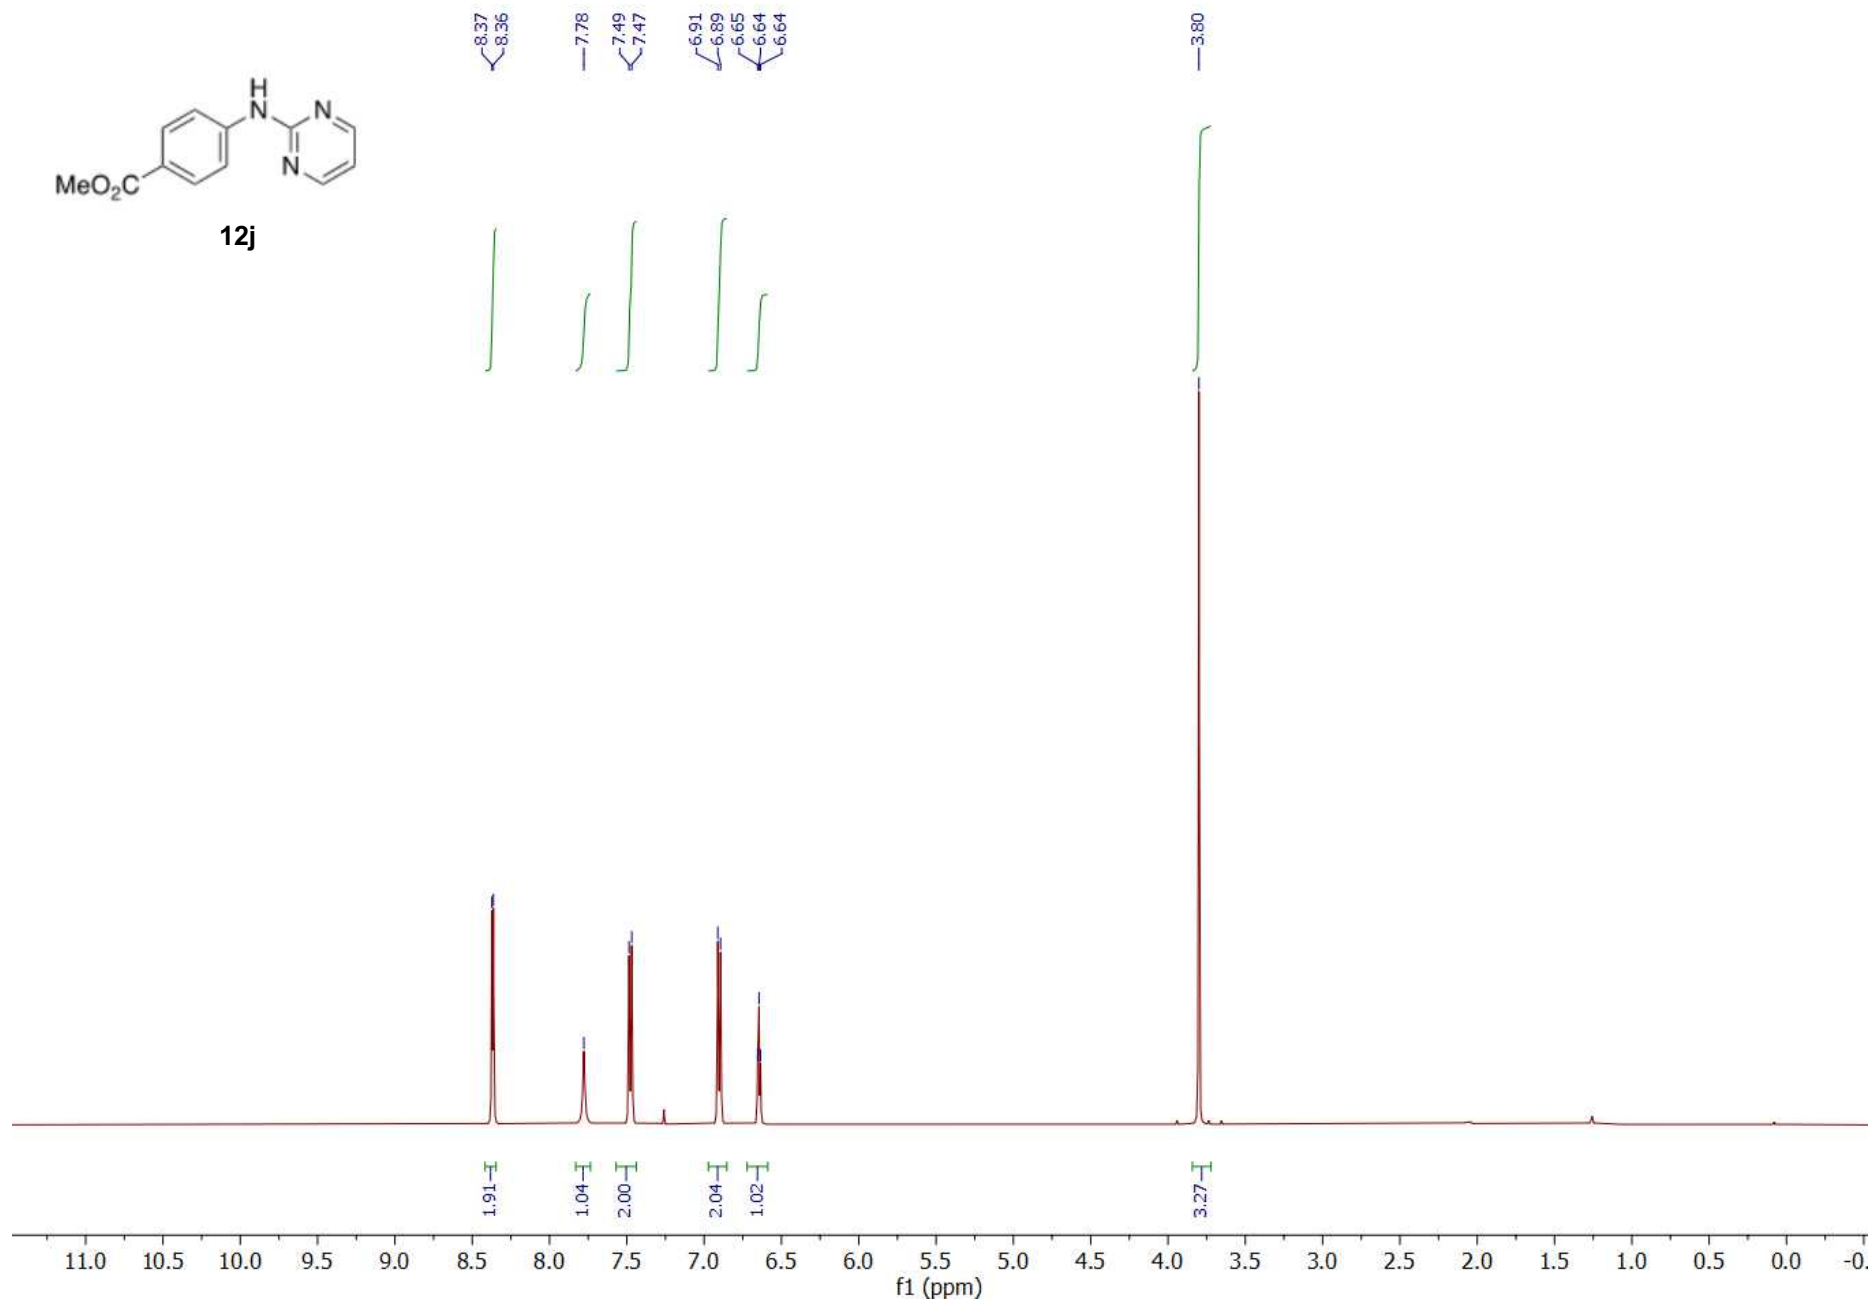

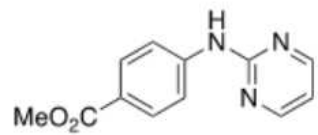

12j

160.76  
158.08  
155.82

132.45

122.37

114.27  
111.94

55.95

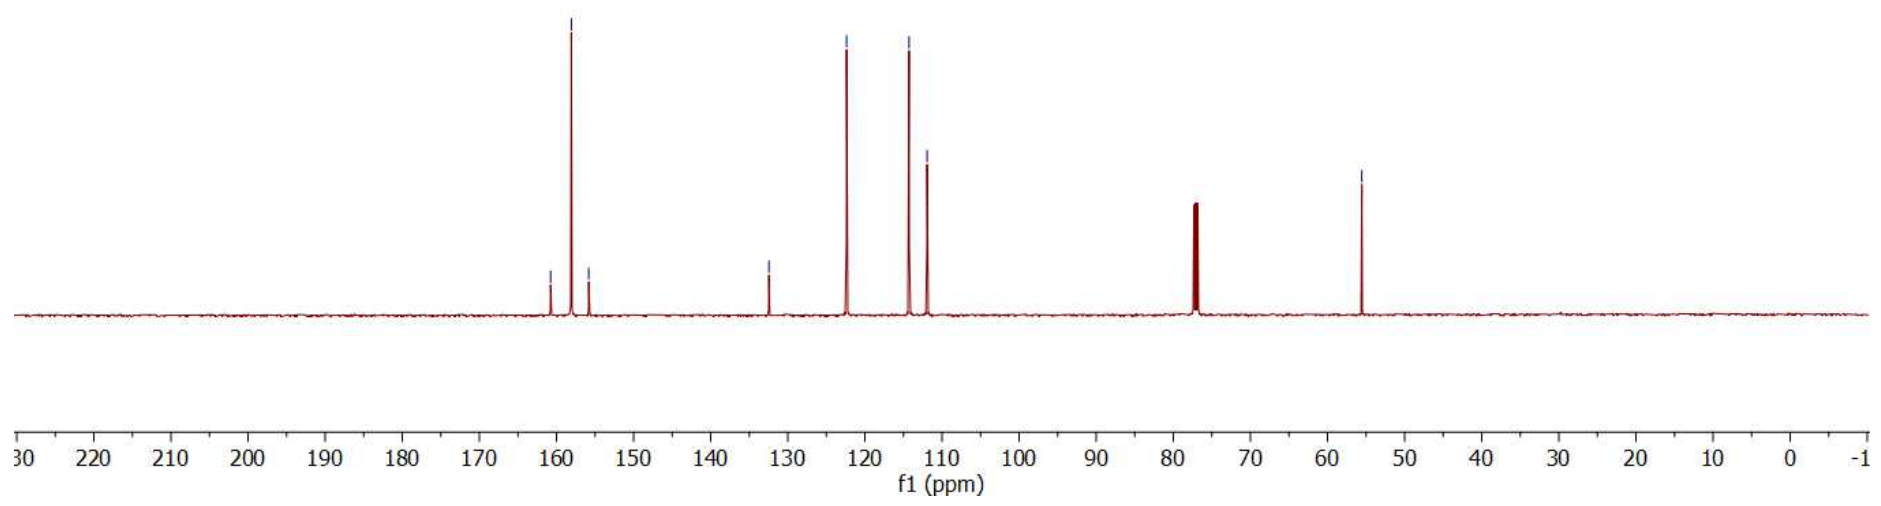

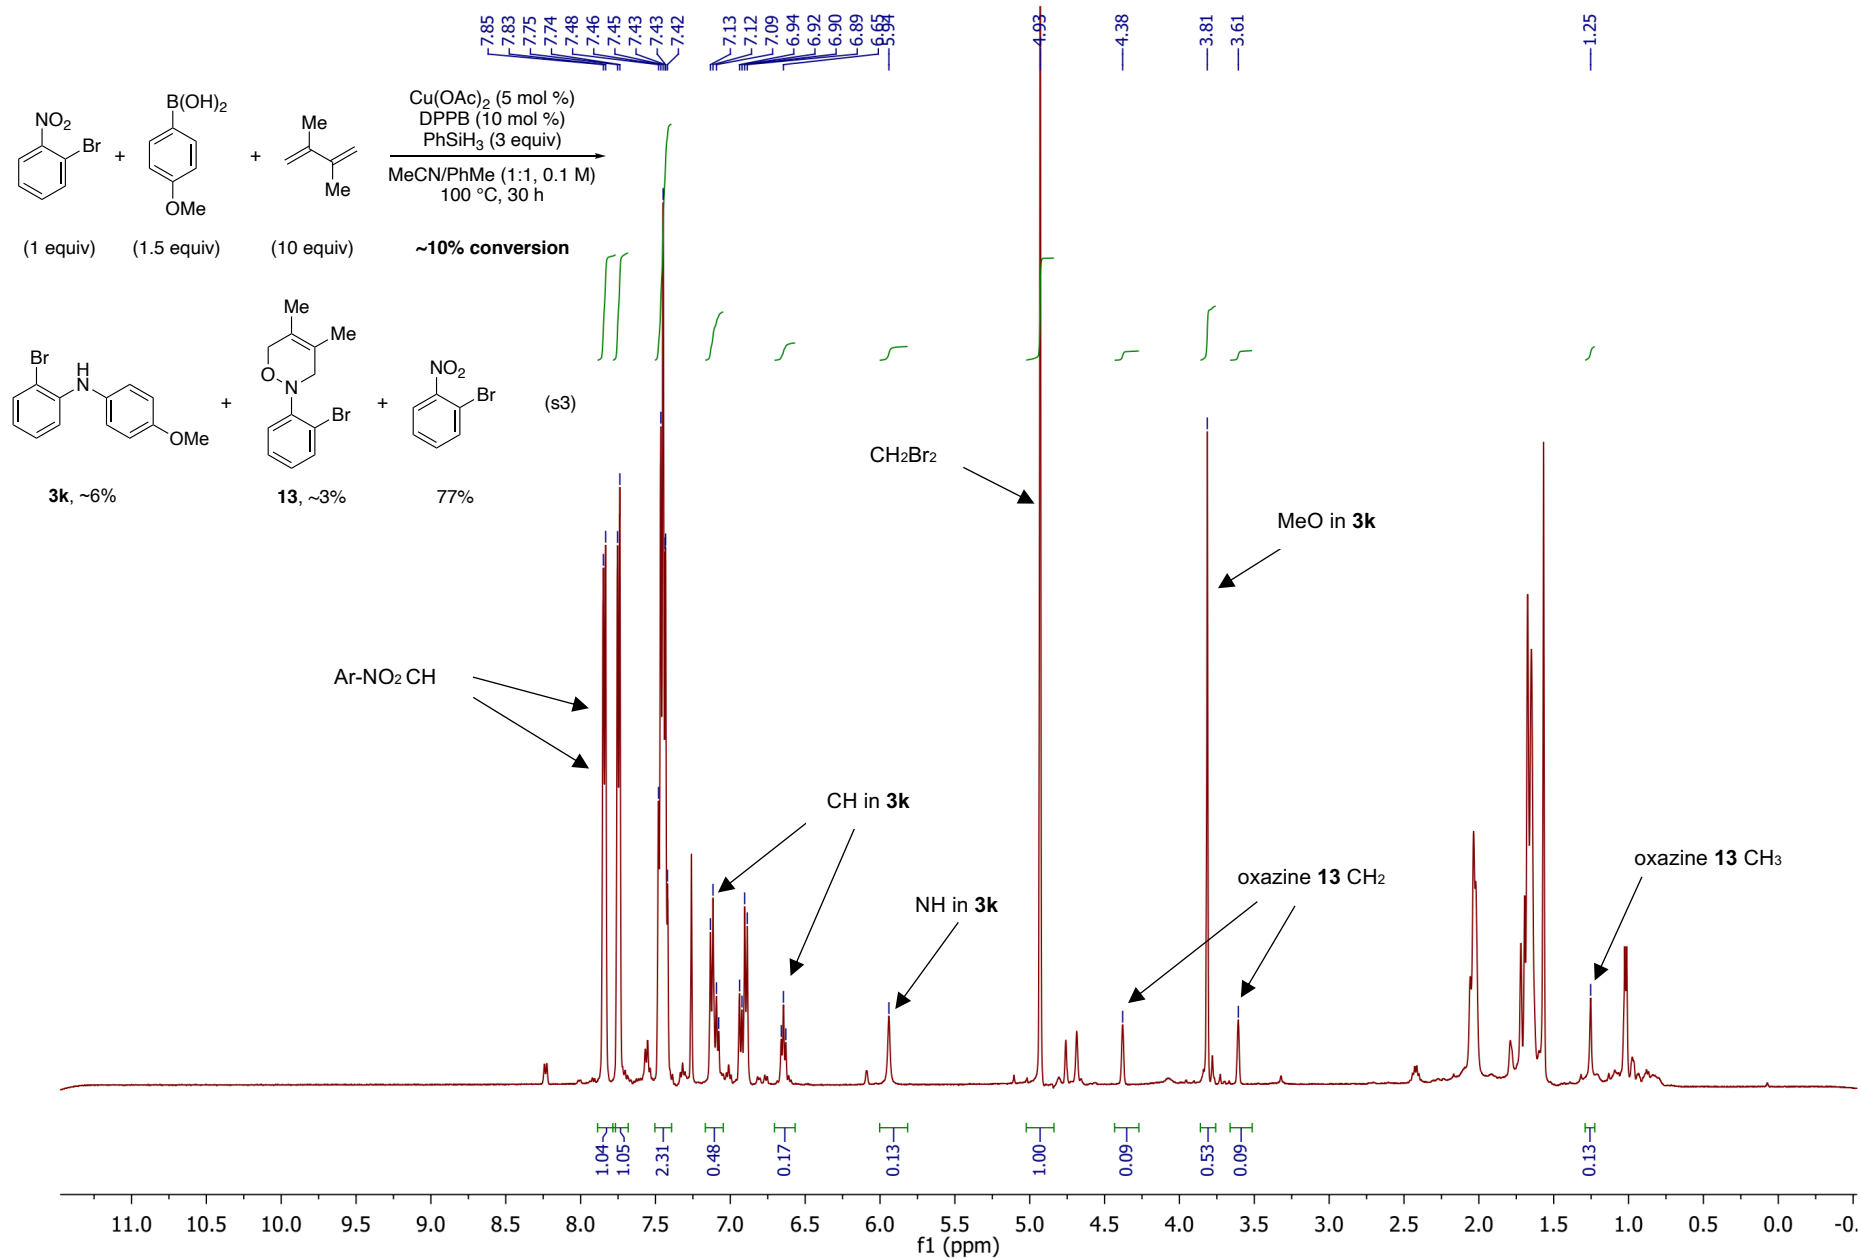

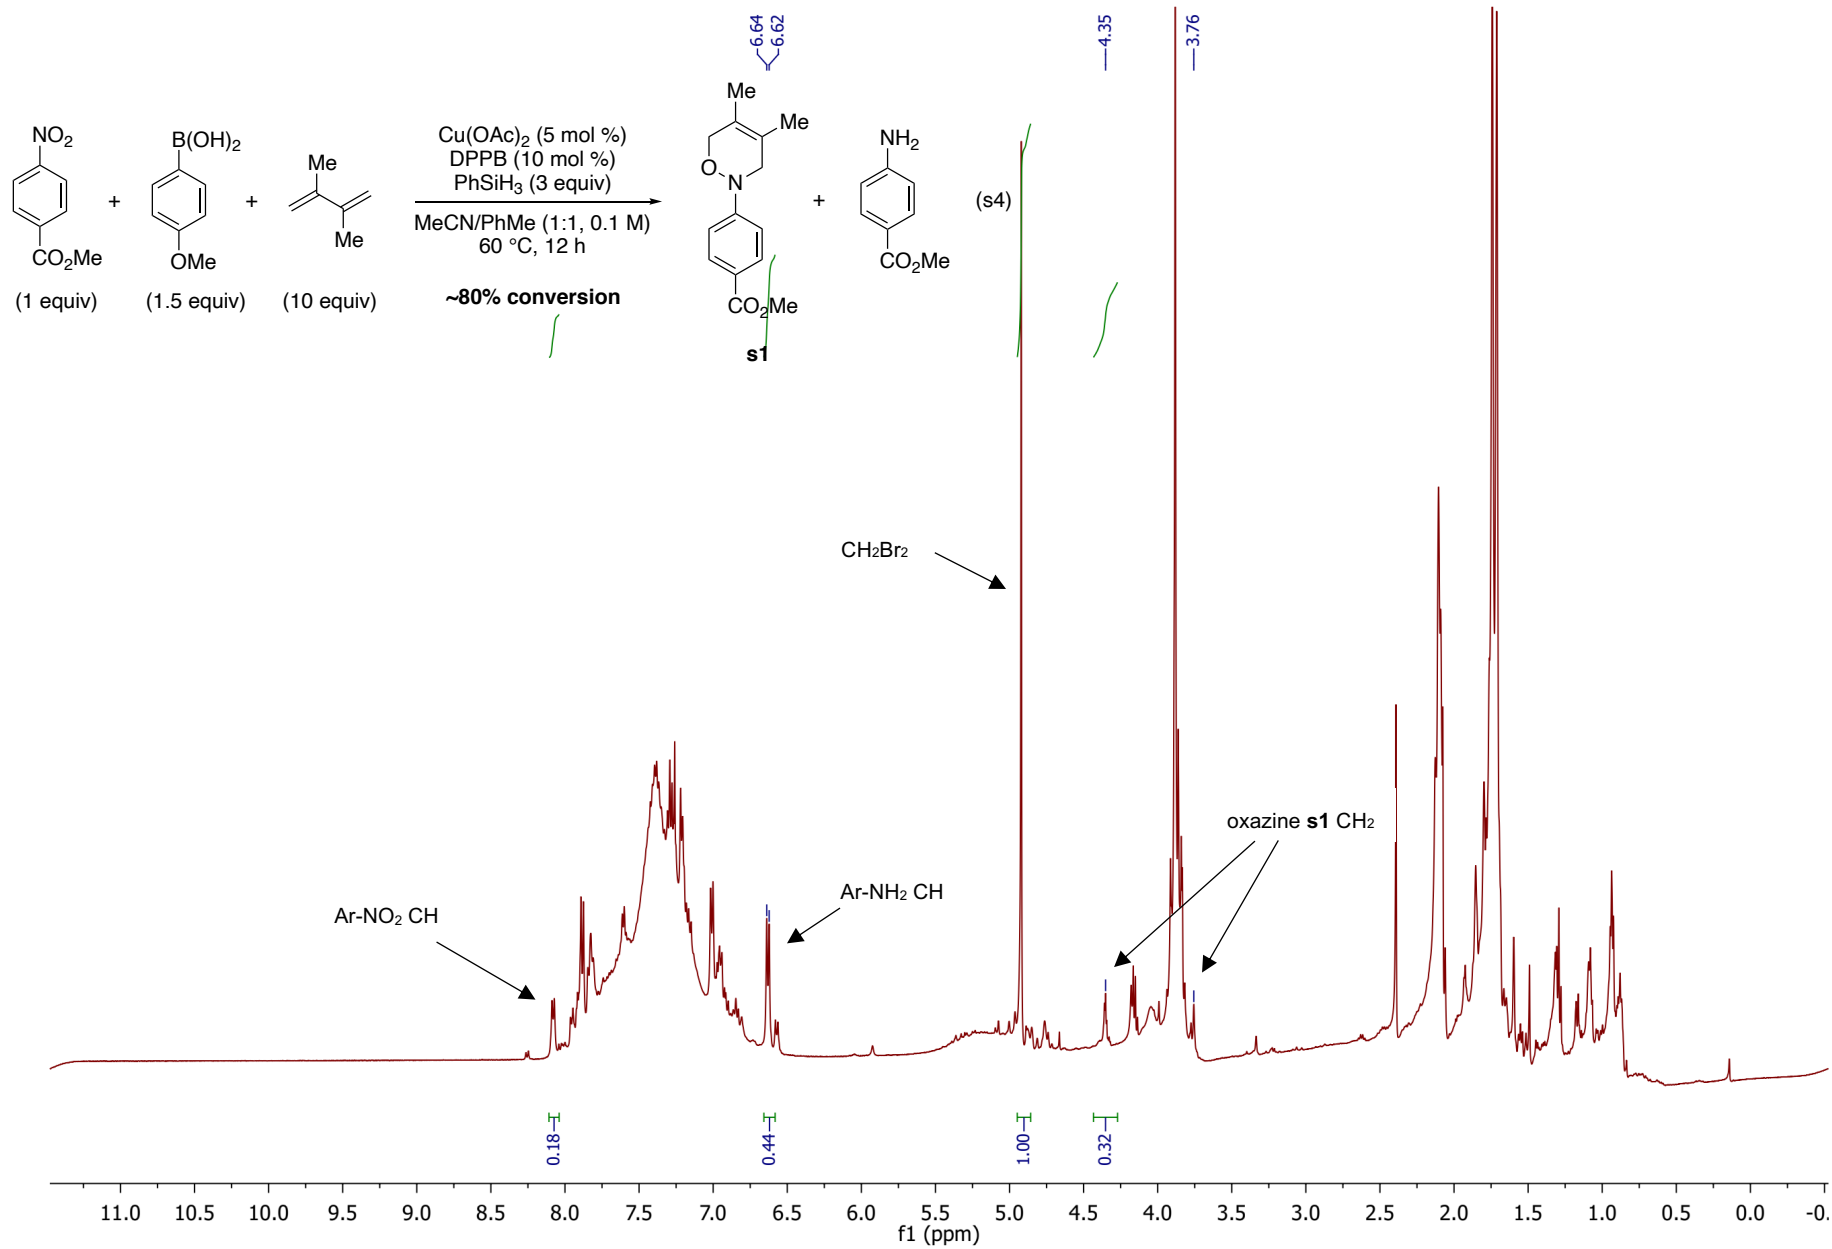

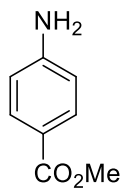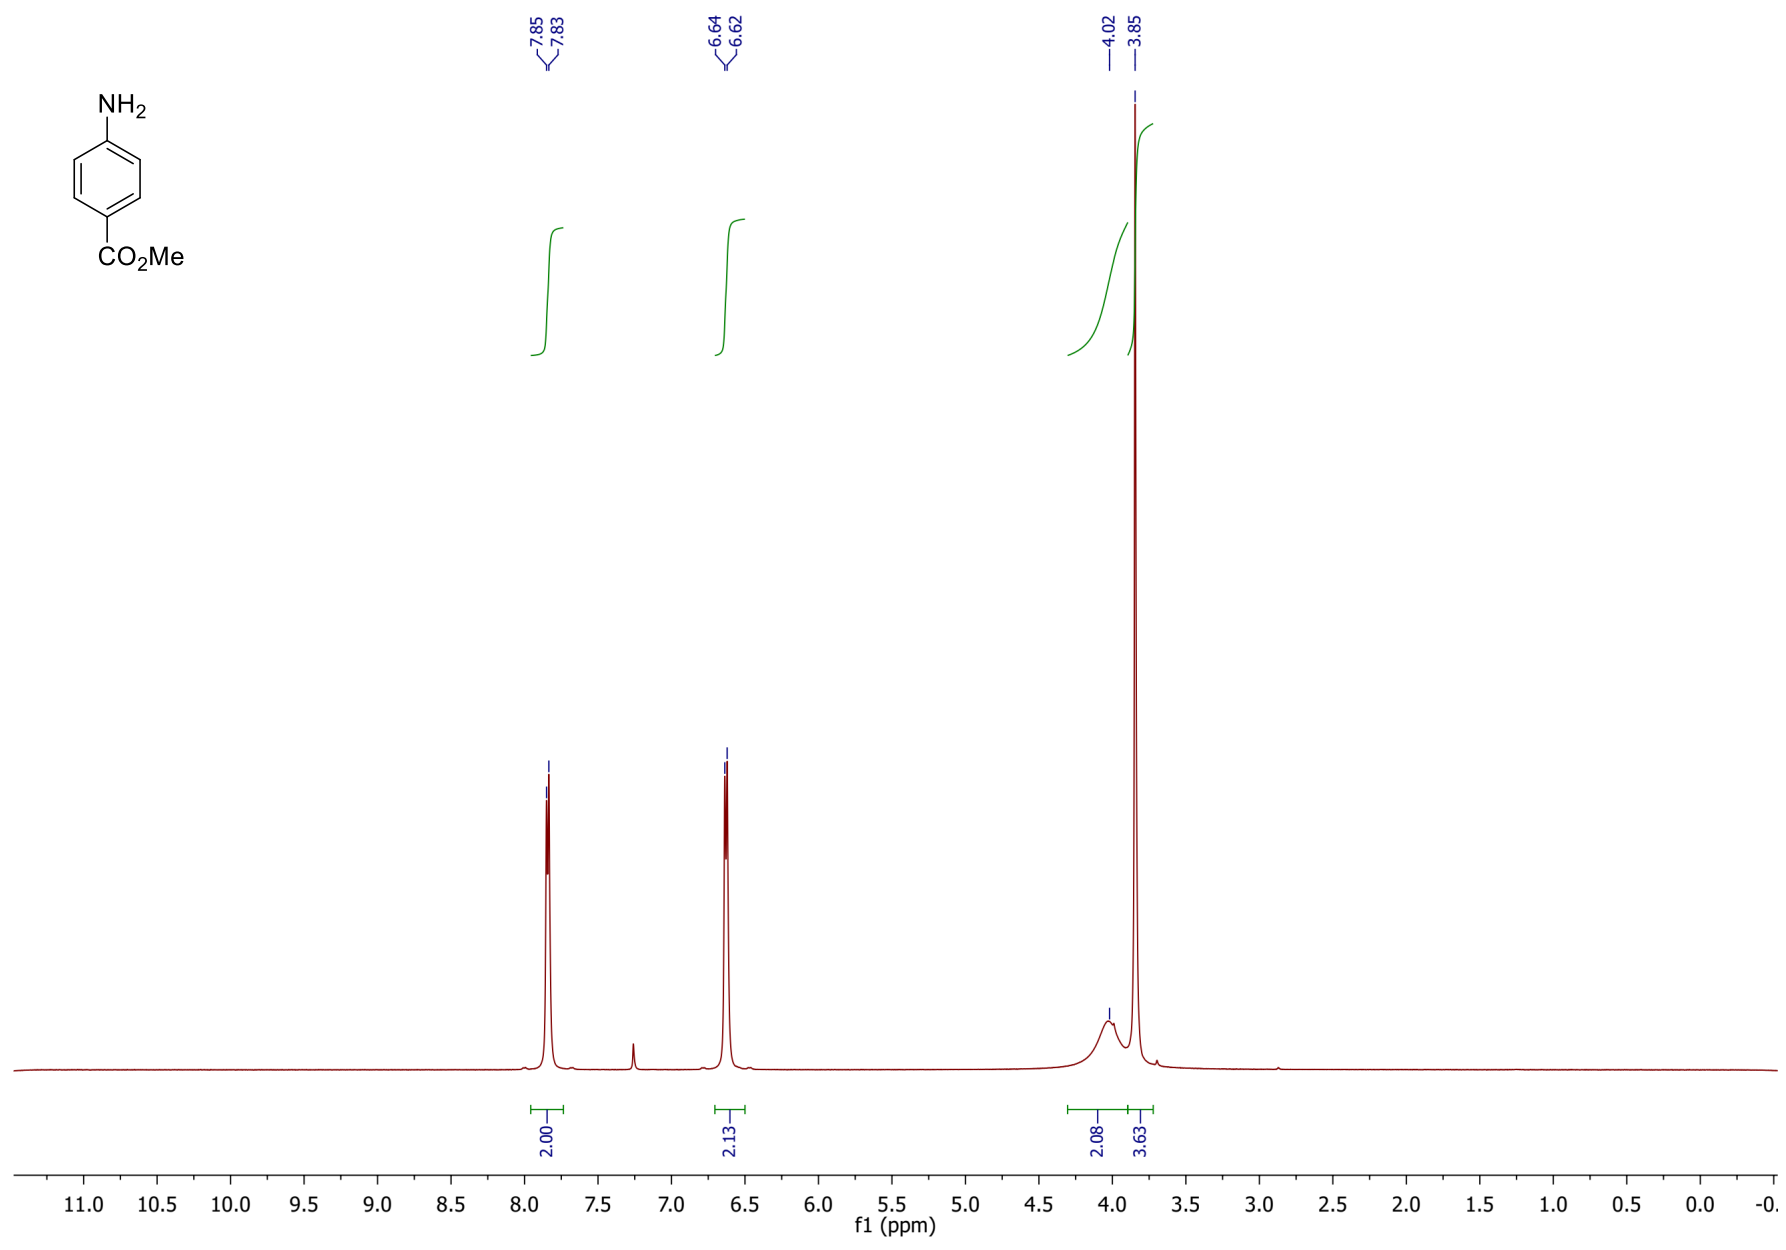

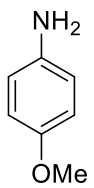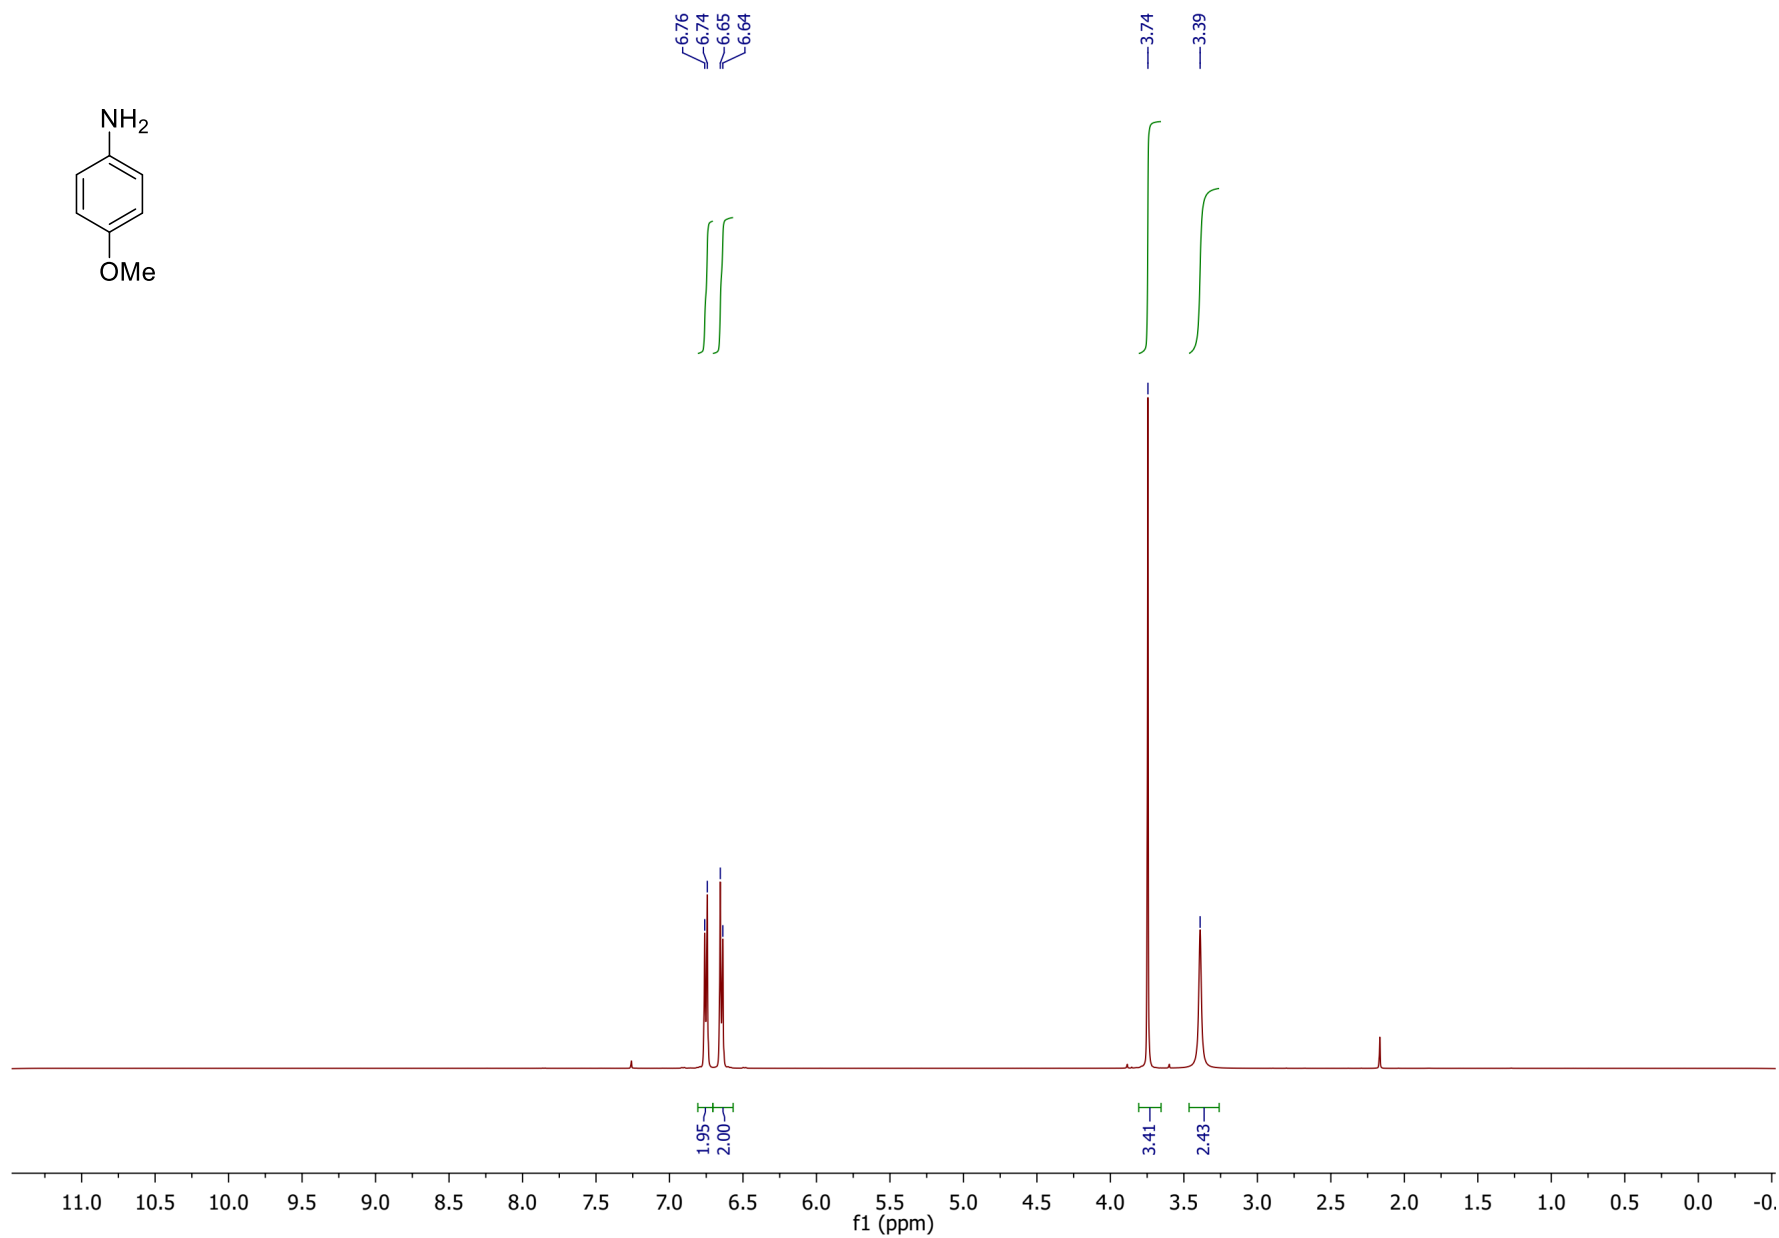



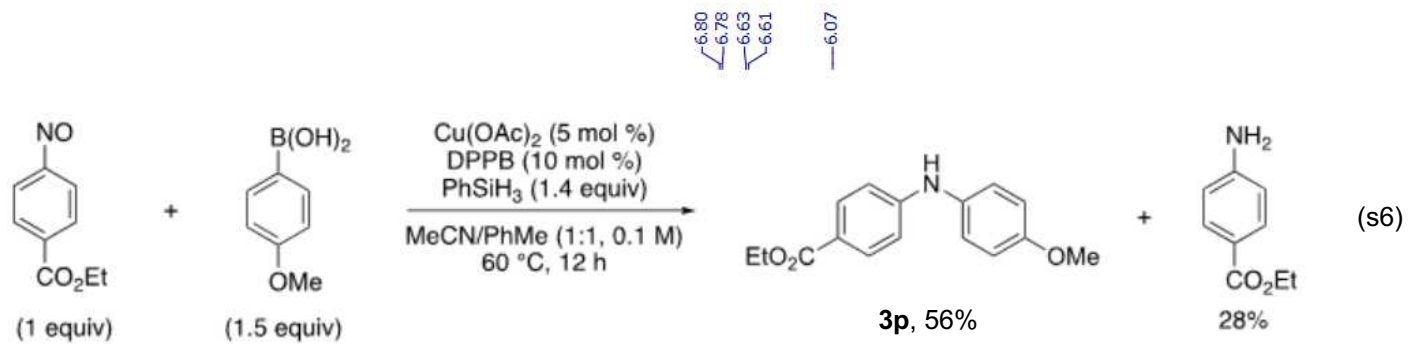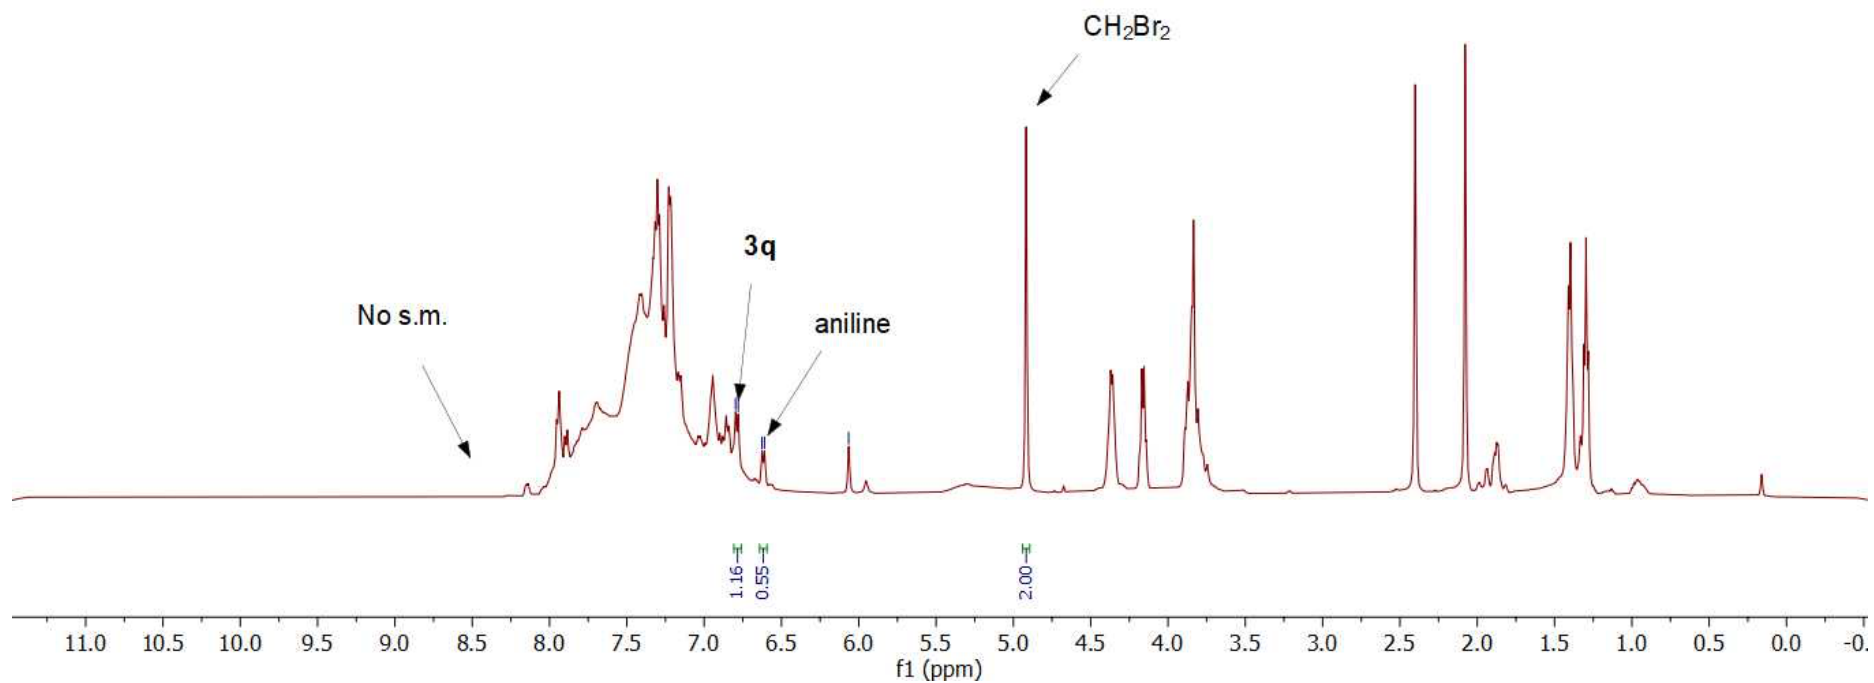



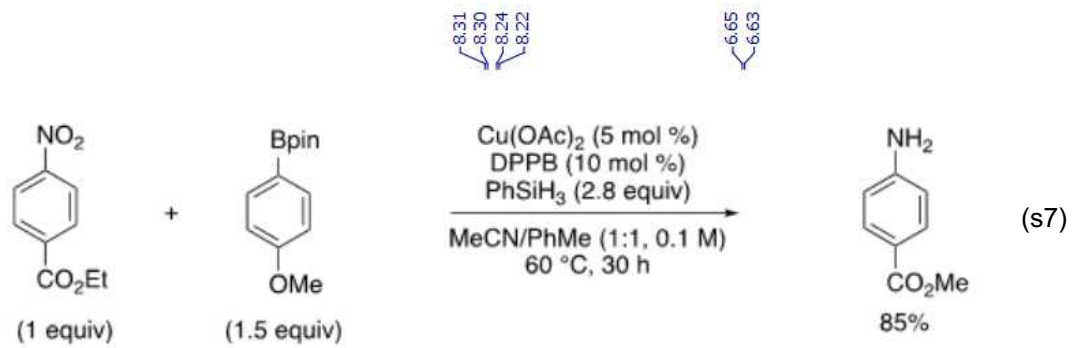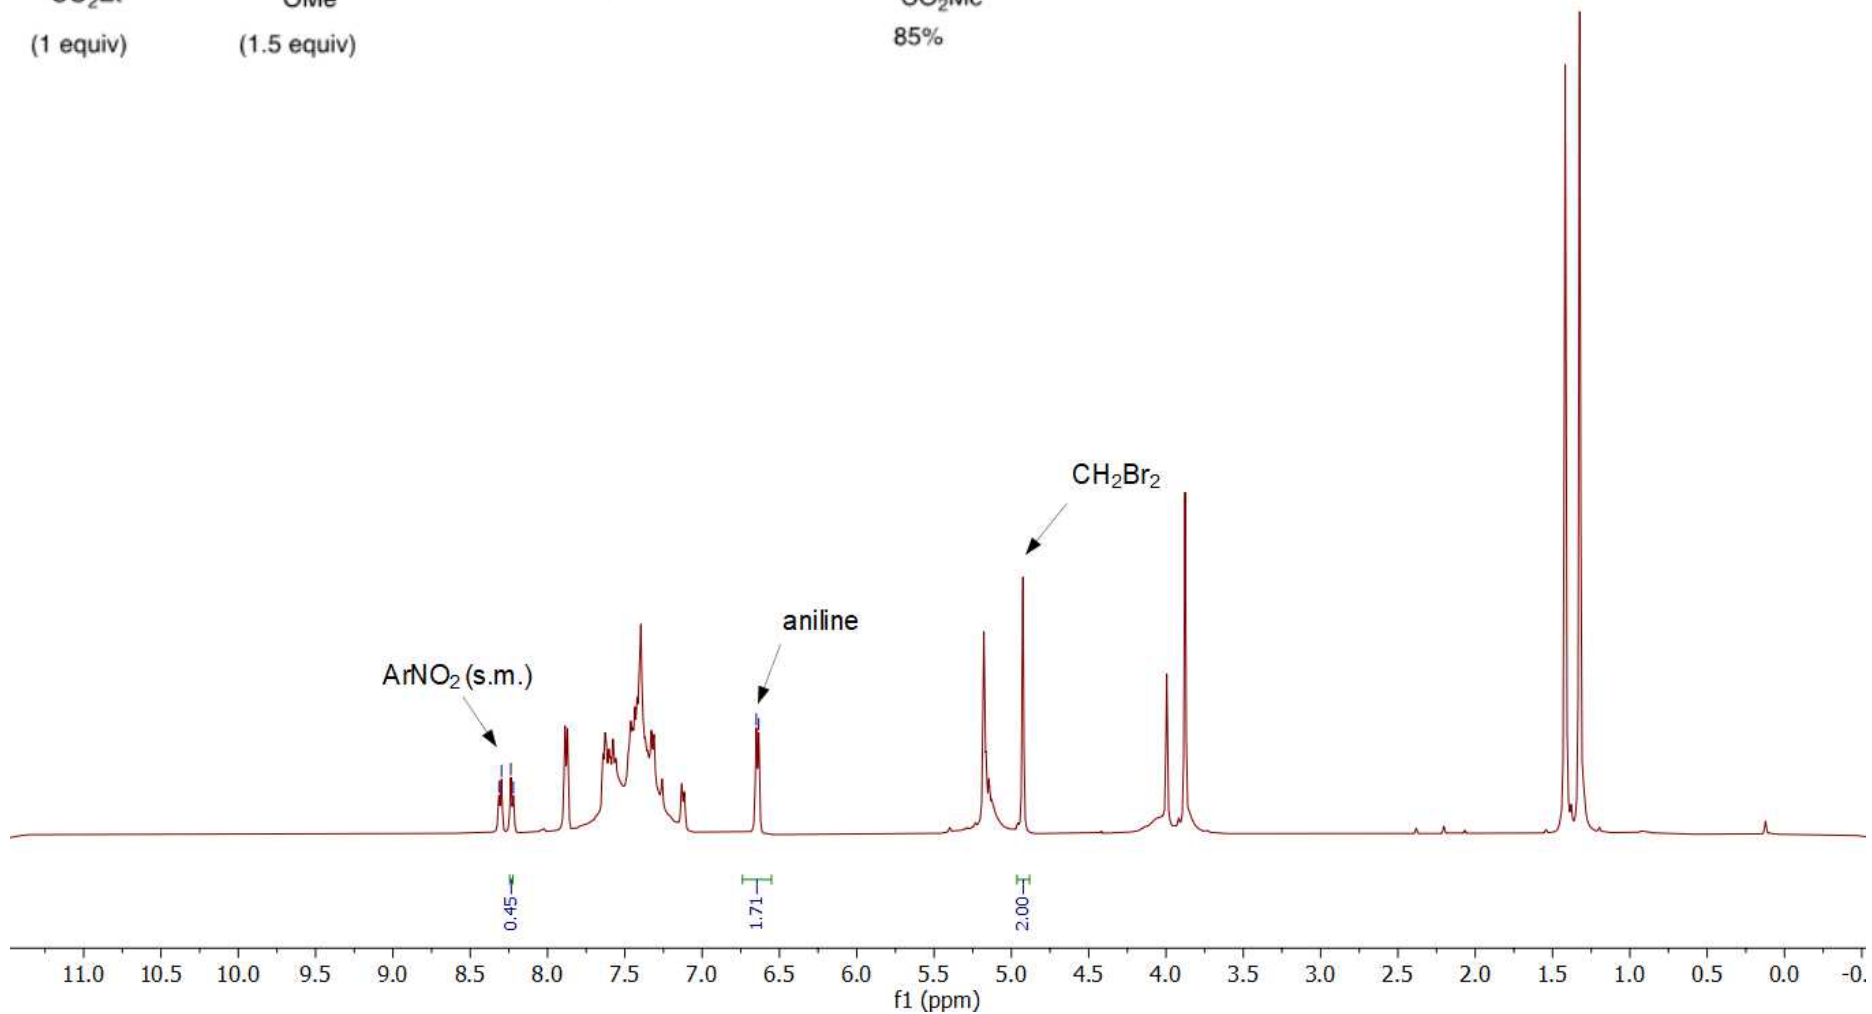

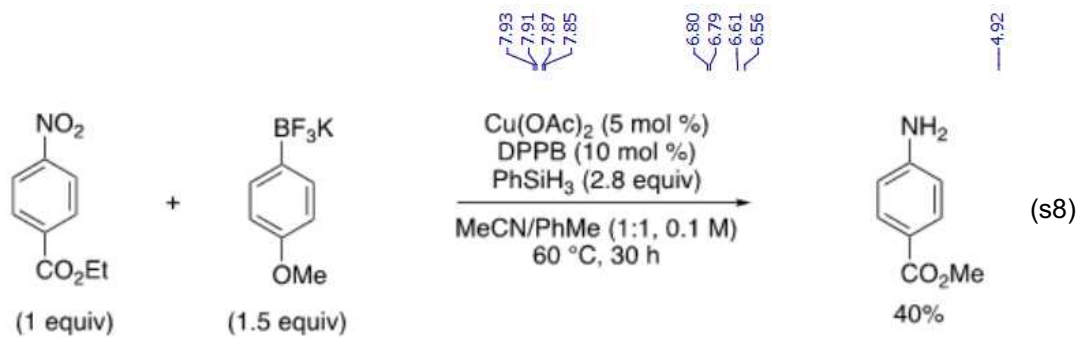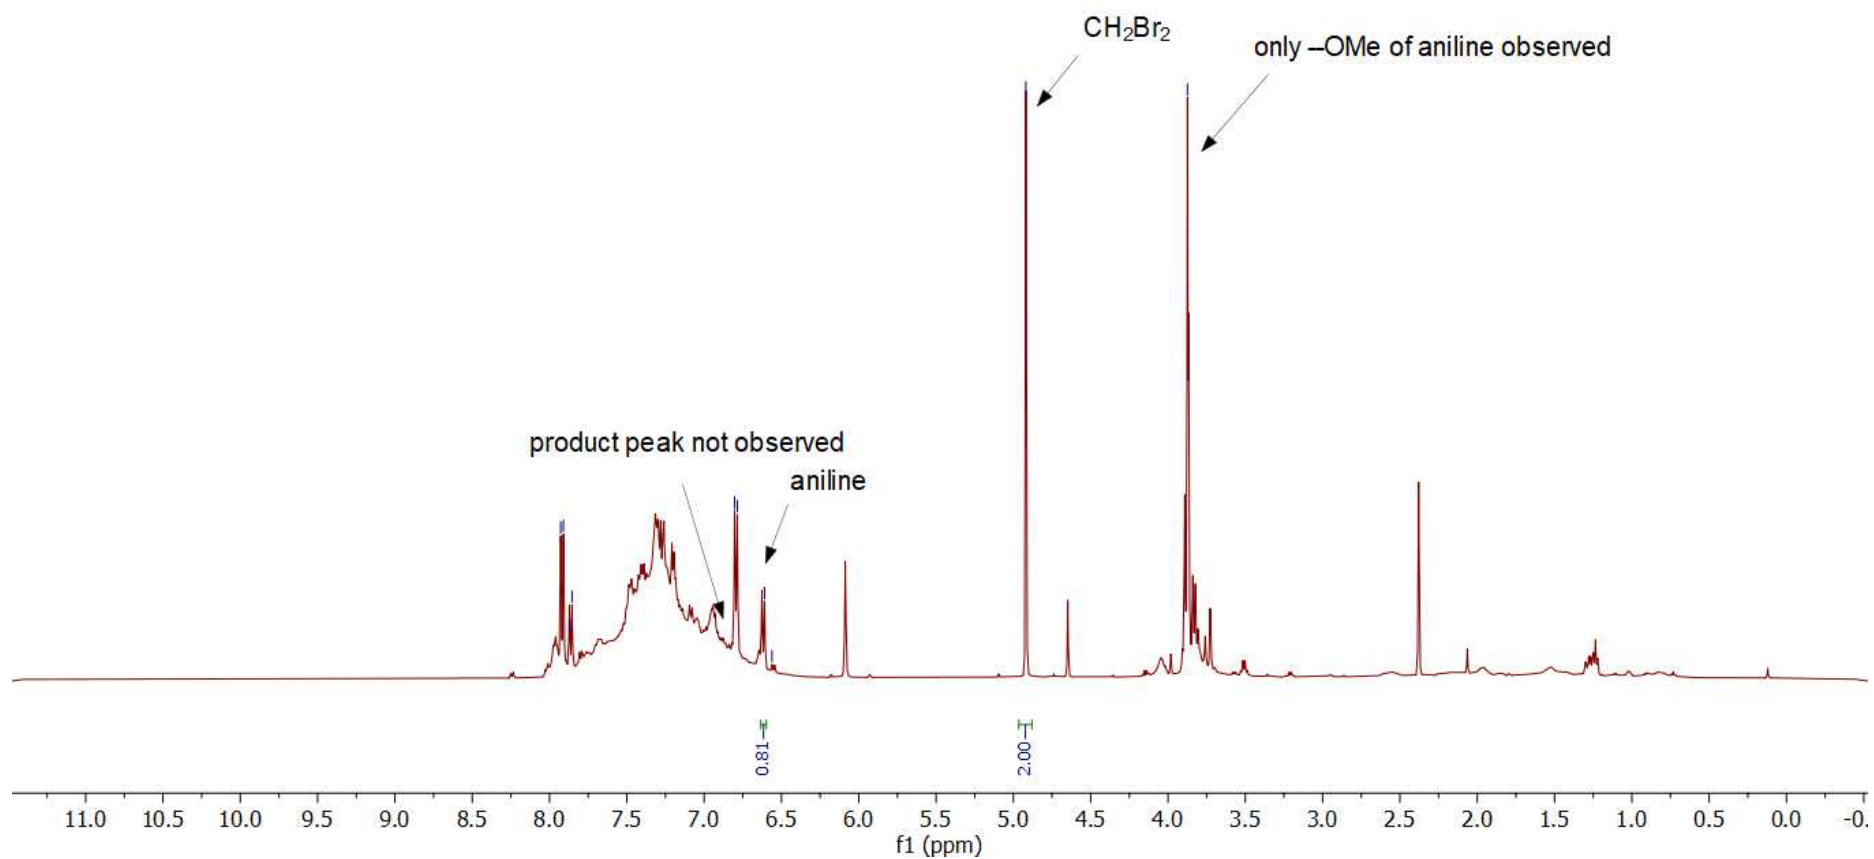

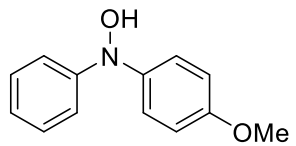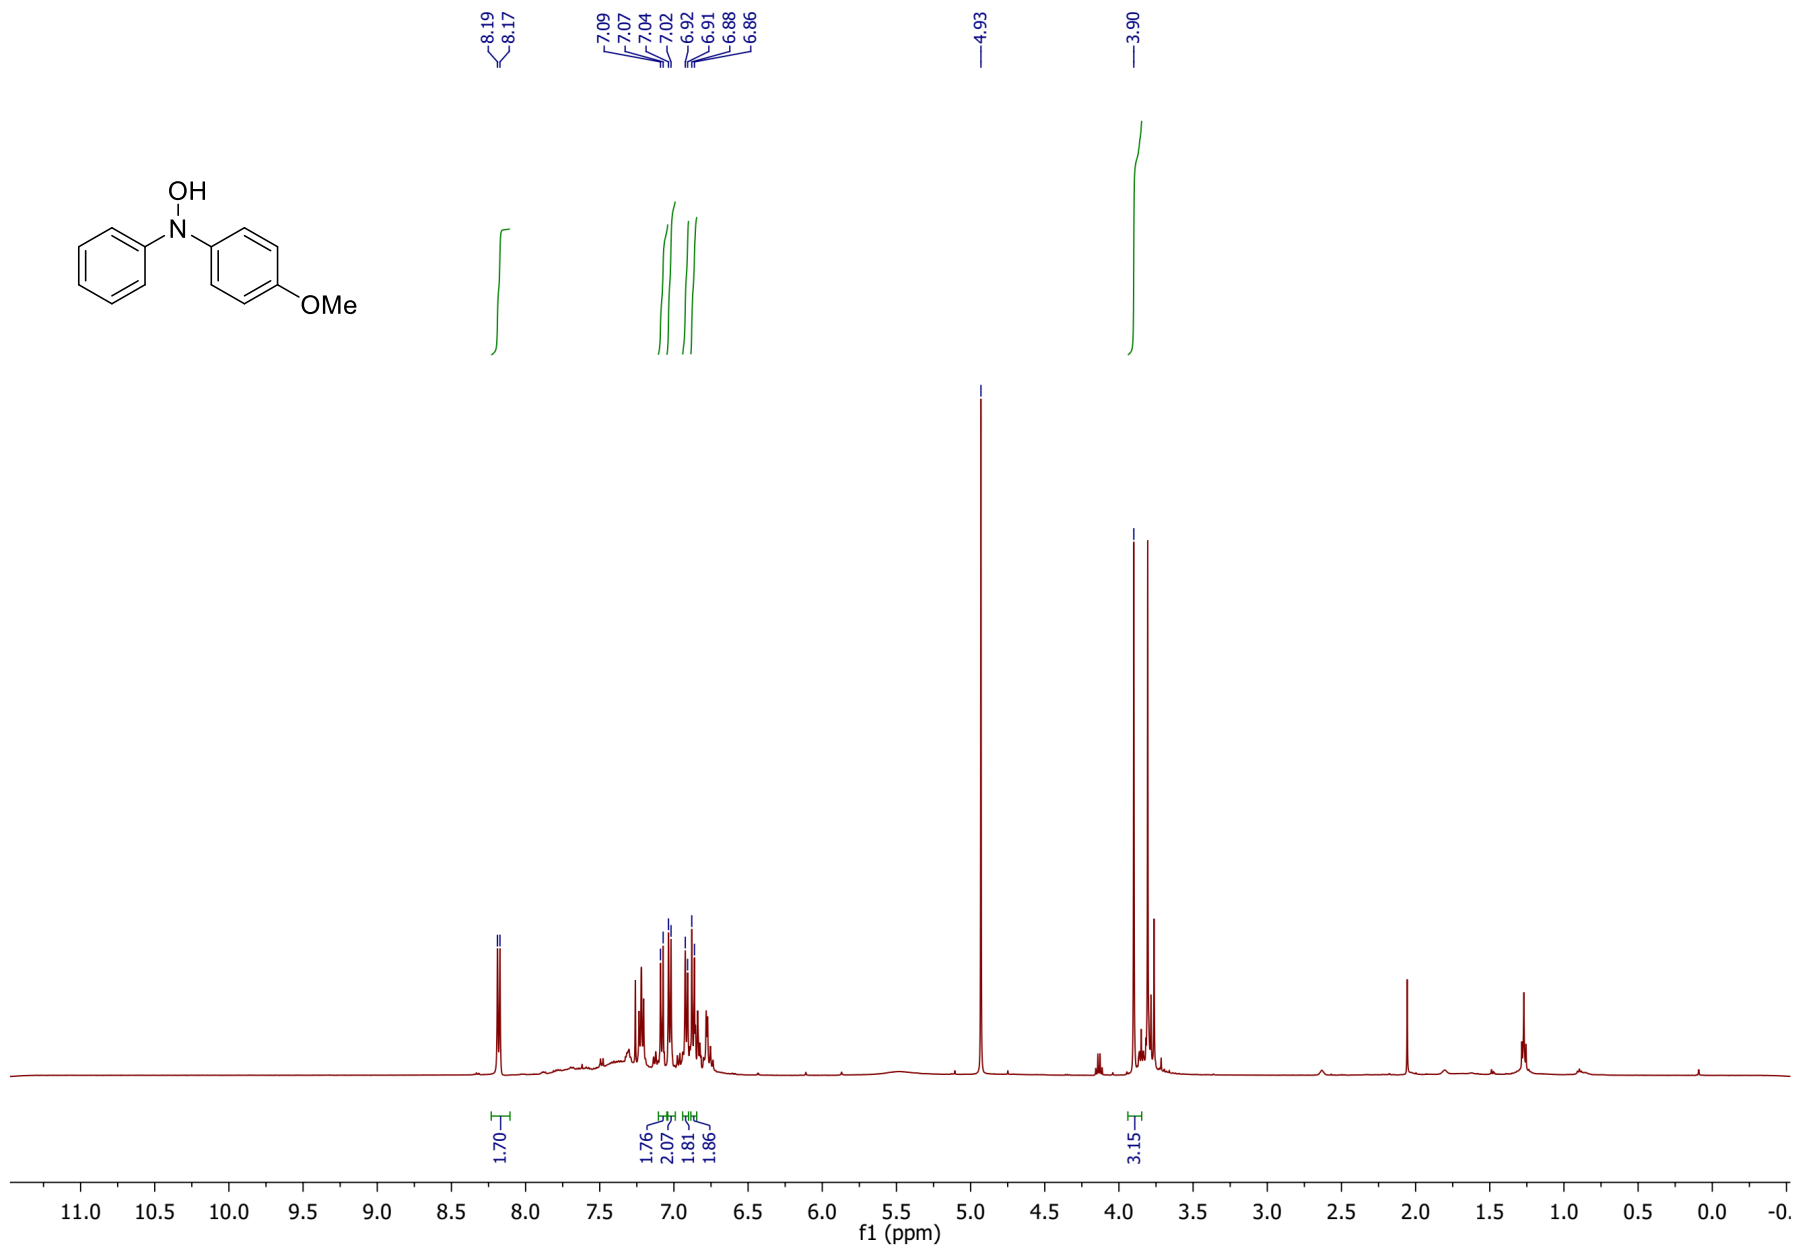

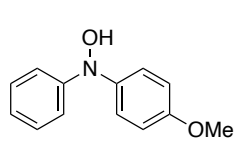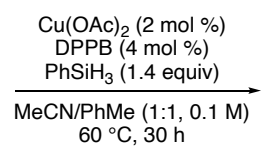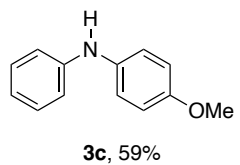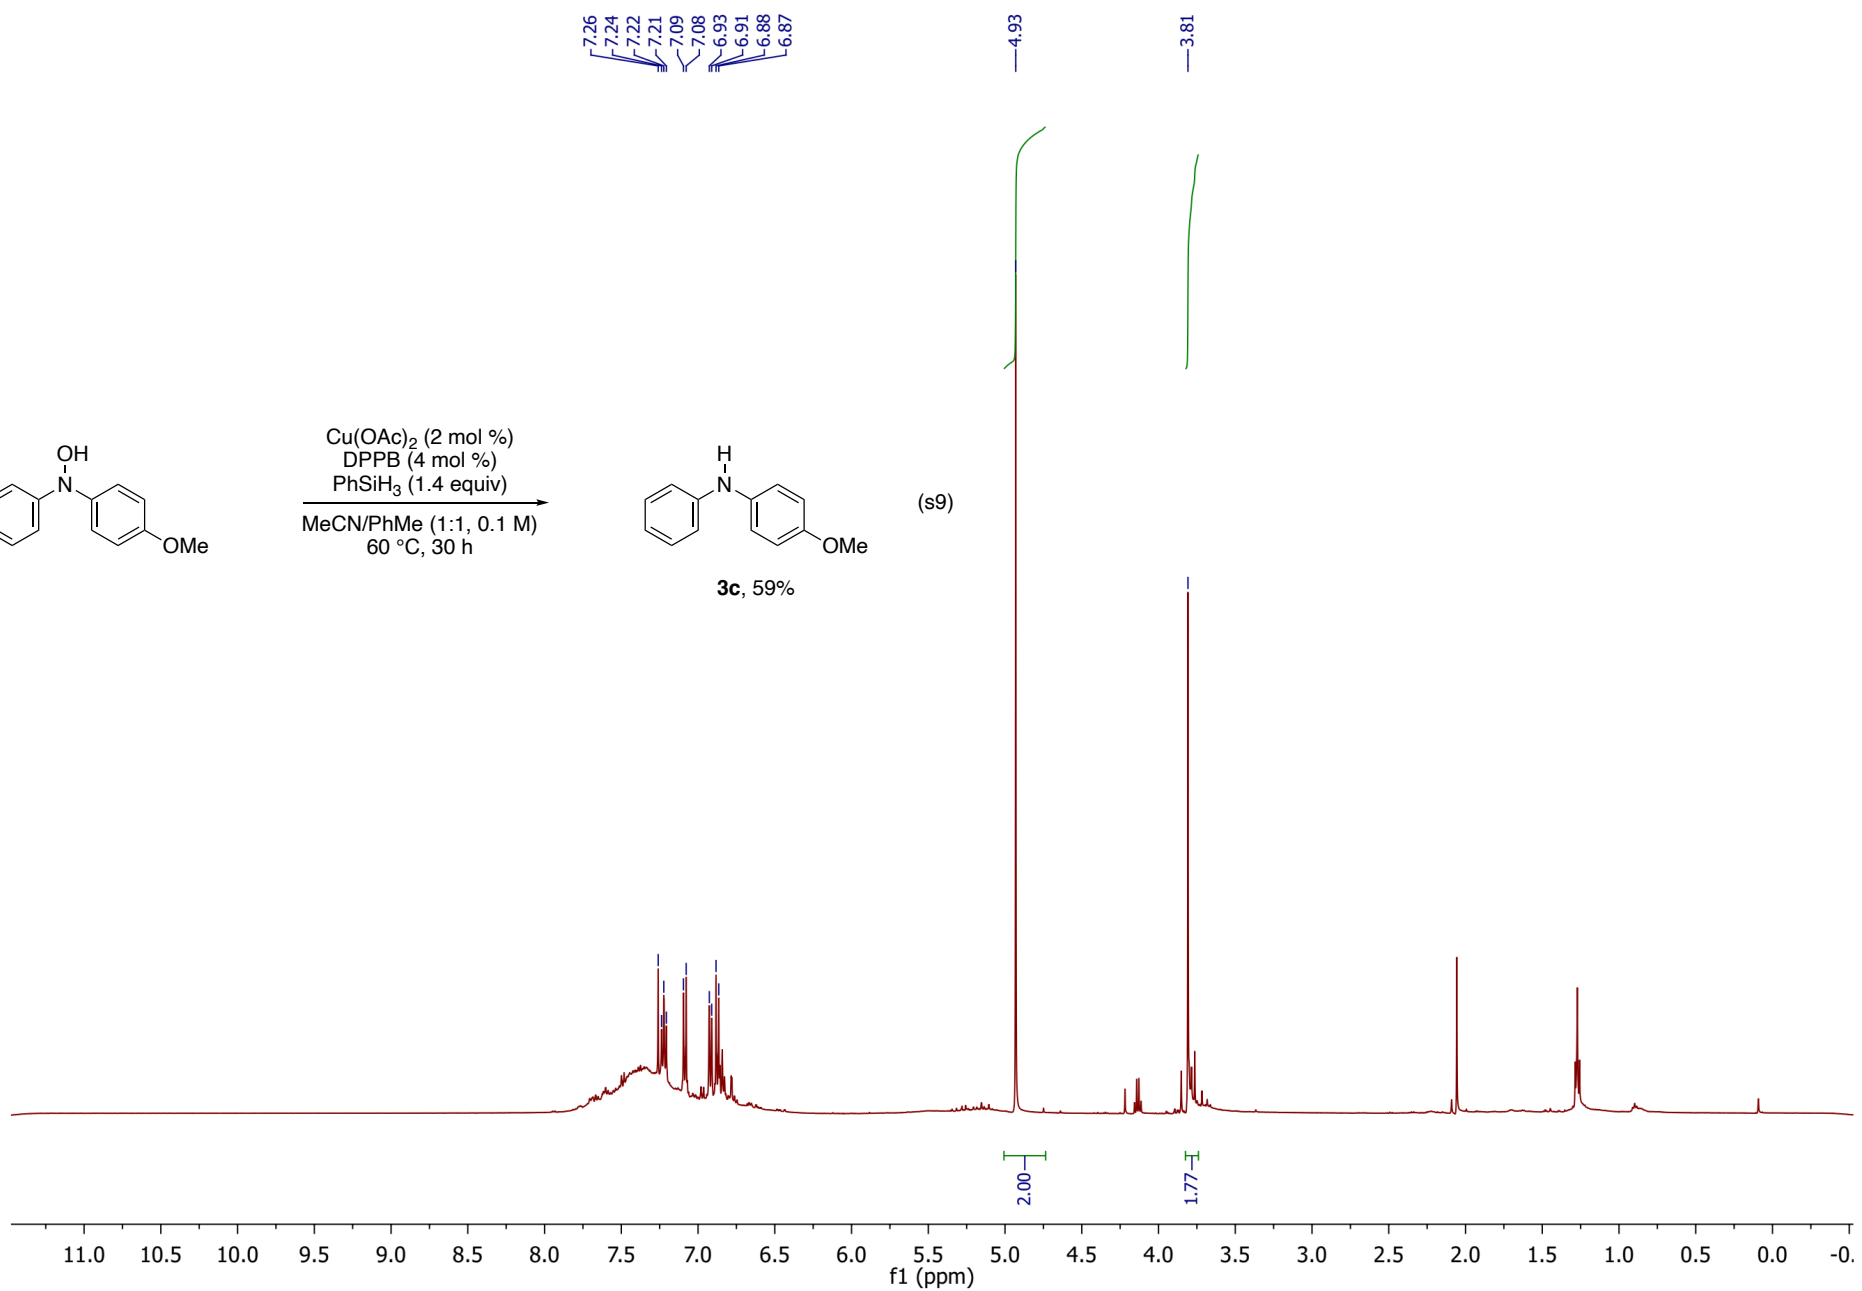

Supplement: NIHMS1792124-supplement-Supporting_Information.pdf [file NIHMS1792124-supplement-Supporting_Information.pdf]
